# Supplementary material for: Prevalence and risk factors associated with chronic kidney disease in Nepal: evidence from a nationally representative population-based cross-sectional study
Source: PubMed Central journal article supplement — BMJ Open. 2022 Mar 21;12(3):e057509. doi: 10.1136/bmjopen-2021-057509 (PMC8938697; doi:10.1136/bmjopen-2021-057509), 2022-03-21
Supplement: bmjopen-2021-057509.draft_revisions.pdf [file bmjopen-2021-057509.draft_revisions.pdf]

# BMJ Open

BMJ Open is committed to open peer review. As part of this commitment we make the peer review history of every article we publish publicly available.

When an article is published we post the peer reviewers' comments and the authors' responses online. We also post the versions of the paper that were used during peer review. These are the versions that the peer review comments apply to.

The versions of the paper that follow are the versions that were submitted during the peer review process. They are not the versions of record or the final published versions. They should not be cited or distributed as the published version of this manuscript.

BMJ Open is an open access journal and the full, final, typeset and author-corrected version of record of the manuscript is available on our site with no access controls, subscription charges or pay-per-view fees (<http://bmjopen.bmj.com>).

If you have any questions on BMJ Open's open peer review process please email [info.bmjopen@bmj.com](mailto:info.bmjopen@bmj.com)

# BMJ Open

## Prevalence and Risk Factors Associated with Chronic Kidney Disease in Nepal: Evidence from a Nationally Representative Population Based Study

|                               |                                                                                                                                                                                                                                                                                                                                                                                                                                                                                                                                                                                                                                                                                                                                                                                                                                                                                                                                                                                                                                                                                                                                                                                                                                                                                                                                                                                                                                                                                                                                                                                                 |
|-------------------------------|-------------------------------------------------------------------------------------------------------------------------------------------------------------------------------------------------------------------------------------------------------------------------------------------------------------------------------------------------------------------------------------------------------------------------------------------------------------------------------------------------------------------------------------------------------------------------------------------------------------------------------------------------------------------------------------------------------------------------------------------------------------------------------------------------------------------------------------------------------------------------------------------------------------------------------------------------------------------------------------------------------------------------------------------------------------------------------------------------------------------------------------------------------------------------------------------------------------------------------------------------------------------------------------------------------------------------------------------------------------------------------------------------------------------------------------------------------------------------------------------------------------------------------------------------------------------------------------------------|
| Journal:                      | <i>BMJ Open</i>                                                                                                                                                                                                                                                                                                                                                                                                                                                                                                                                                                                                                                                                                                                                                                                                                                                                                                                                                                                                                                                                                                                                                                                                                                                                                                                                                                                                                                                                                                                                                                                 |
| Manuscript ID                 | bmjopen-2021-057509                                                                                                                                                                                                                                                                                                                                                                                                                                                                                                                                                                                                                                                                                                                                                                                                                                                                                                                                                                                                                                                                                                                                                                                                                                                                                                                                                                                                                                                                                                                                                                             |
| Article Type:                 | Original research                                                                                                                                                                                                                                                                                                                                                                                                                                                                                                                                                                                                                                                                                                                                                                                                                                                                                                                                                                                                                                                                                                                                                                                                                                                                                                                                                                                                                                                                                                                                                                               |
| Date Submitted by the Author: | 17-Sep-2021                                                                                                                                                                                                                                                                                                                                                                                                                                                                                                                                                                                                                                                                                                                                                                                                                                                                                                                                                                                                                                                                                                                                                                                                                                                                                                                                                                                                                                                                                                                                                                                     |
| Complete List of Authors:     | <p>Poudyal, Anil; Nepal Health Research Council (NHRC) Karki, Khem; Department of Community Medicine, Maharajgunj Medical Campus, Kathmandu, Nepal ; Institute of Occupational, Social and Environmental Medicine, Goethe University, Frankfurt am Main, Germany Shrestha, Namuna; Public Health Promotion and Development Organization;</p> <p>Aryal , KK; MOMENTUM Country and Global Leadership, Save the Children Nepal, Kathmandu, Nepal, Research Section</p> <p>Mahato, Namra ; Nepal Health Research Council</p> <p>Bista, Bihungum; Nepal Health Research Council, Research</p> <p>Ghimire, Laxmi; Sanjeevani College of Medical Sciences</p> <p>K.C., Dirghayu; Public Health Promotion and Development Organization. Kathmandu, Nepal, Research</p> <p>Gyanwali, Pradip ; Nepal Health Research Council (NHRC), Ramshah Path, Kathmandu, Nepal</p> <p>Jha, Anjani; Nepal Health Research Council (NHRC), Ramshah Path, Kathmandu, Nepal</p> <p>Garcia Larsen, Vanessa; Johns Hopkins University Bloomberg School of Public Health, International Health</p> <p>Kuch, Ulrich; Institute of Occupational, Social and Environmental Medicine, Goethe University, Frankfurt am Main, Germany, Social and Environmental Medicine</p> <p>Groneberg, David; Goethe-Universität, Institut of Occupational Medicine, Social Medicine and Environmental Medicine</p> <p>Sharma, Sanjib Kumar; BP Koirala Institute of Health Sciences, Department of Internal Medicine</p> <p>Dhimal, Meghnath; Nepal Health Research Council (NHRC); Goethe University, Social and Environmental Medicine</p> |
| Keywords:                     | Chronic renal failure < NEPHROLOGY, Dialysis < NEPHROLOGY, Glomerulonephritis < NEPHROLOGY, Renal transplantation < NEPHROLOGY                                                                                                                                                                                                                                                                                                                                                                                                                                                                                                                                                                                                                                                                                                                                                                                                                                                                                                                                                                                                                                                                                                                                                                                                                                                                                                                                                                                                                                                                  |
|                               |                                                                                                                                                                                                                                                                                                                                                                                                                                                                                                                                                                                                                                                                                                                                                                                                                                                                                                                                                                                                                                                                                                                                                                                                                                                                                                                                                                                                                                                                                                                                                                                                 |

SCHOLARONE™  
Manuscripts

1  
2  
3  
4  
5  
6  
7  
8  
9  
10  
11  
12  
13  
14  
15  
16  
17  
18  
19  
20  
21  
22  
23  
24  
25  
26  
27  
28  
29  
30  
31  
32  
33  
34  
35  
36  
37  
38  
39  
40  
41  
42  
43  
44  
45  
46  
47  
48  
49  
50  
51  
52  
53  
54  
55  
56  
57  
58  
59  
60

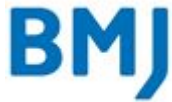

I, the Submitting Author has the right to grant and does grant on behalf of all authors of the Work (as defined in the below author licence), an exclusive licence and/or a non-exclusive licence for contributions from authors who are: i) UK Crown employees; ii) where BMJ has agreed a CC-BY licence shall apply, and/or iii) in accordance with the terms applicable for US Federal Government officers or employees acting as part of their official duties; on a worldwide, perpetual, irrevocable, royalty-free basis to BMJ Publishing Group Ltd ("BMJ") its licensees and where the relevant Journal is co-owned by BMJ to the co-owners of the Journal, to publish the Work in this journal and any other BMJ products and to exploit all rights, as set out in our [licence](#).

The Submitting Author accepts and understands that any supply made under these terms is made by BMJ to the Submitting Author unless you are acting as an employee on behalf of your employer or a postgraduate student of an affiliated institution which is paying any applicable article publishing charge ("APC") for Open Access articles. Where the Submitting Author wishes to make the Work available on an Open Access basis (and intends to pay the relevant APC), the terms of reuse of such Open Access shall be governed by a Creative Commons licence – details of these licences and which [Creative Commons](#) licence will apply to this Work are set out in our licence referred to above.

Other than as permitted in any relevant BMJ Author's Self Archiving Policies, I confirm this Work has not been accepted for publication elsewhere, is not being considered for publication elsewhere and does not duplicate material already published. I confirm all authors consent to publication of this Work and authorise the granting of this licence.

1  
2  
3  
4 1 **Prevalence and Risk Factors Associated with Chronic Kidney Disease in Nepal: Evidence**  
5  
6 2 **from a Nationally Representative Population Based Study**  
7

8  
9 3 Anil Poudyal<sup>1\*#</sup>, Khem Bahadur Karki<sup>1,2,3#</sup>, Namuna Shrestha<sup>4</sup>, Krishna Kumar Aryal<sup>5</sup>, Namra  
10  
11 4 Kumar Mahato<sup>1</sup>, Bihungum Bista<sup>1</sup>, Laxmi Ghimire<sup>6</sup>, Dirghayu KC<sup>4</sup>, Pradip Gyanwali<sup>1</sup>, Anjani  
12  
13 5 Kumar Jha<sup>1</sup>, Vanessa Garcia-Larsen<sup>7</sup>, Ulrich Kuch<sup>3</sup>, David A, Groneberg<sup>3</sup>, Sanjib Kumar  
14  
15 6 Sharma<sup>8</sup>, Meghnath Dhimal<sup>1,3\*</sup>  
16  
17

18  
19 7 **# Equal contributors**  
20  
21

22 8 <sup>1</sup> Nepal Health Research Council (NHRC), Ramshah Path, Kathmandu, Nepal  
23  
24

25 9 <sup>2</sup> Department of Community Medicine, Maharajgunj Medical Campus, Kathmandu, Nepal  
26  
27

28 10 <sup>3</sup> Institute of Occupational, Social and Environmental Medicine, Goethe University, Frankfurt am  
29  
30 11 Main, Germany  
31  
32

33 12 <sup>4</sup> Public Health Promotion and Development Organization, Kathmandu, Nepal  
34  
35

36 13 <sup>5</sup> MOMENTUM Country and Global Leadership, Save the Children Nepal, Kathmandu, Nepal  
37  
38

39 14 <sup>6</sup> Sanjeevani College of Medical Sciences, Rupandehi, Nepal  
40  
41  
42

43 15 <sup>7</sup> Department of International Health, The Johns Hopkins Bloomberg School of Public Health,  
44  
45 16 Baltimore, Maryland, USA  
46  
47

48 17 <sup>8</sup> Department of Internal Medicine, BP Koirala Institute of Health Sciences, Dharan, Nepal  
49  
50

51  
52 18 **\*Corresponding Author:** Anil poudyal( Email: [poudyalanil123@gmail.com](mailto:poudyalanil123@gmail.com))  
53  
54

55 19 **\*Co-corresponding Author:** Meghnath Dhimal (Email: [meghdhimal@gmail.com](mailto:meghdhimal@gmail.com))  
56  
57

1  
2  
3 **20 Abstract**  
4

5 **21 Objective:** This study aimed to determine population based prevalence of Chronic Kidney  
6  
7  
8 **22 Disease (CKD) and its associated factors in Nepal.**  
9

10  
11 **23 Study Design:** The study was a nationwide population-based cross sectional study  
12  
13

14 **24 Setting & Participants:** nationally representative sample of 12109 adults aged 20 years and  
15  
16 **25 above between 2016 and 2018 in Nepal.**  
17  
18

19 **26 Primary and secondary outcome measures:** Primary outcome in this study was population  
20  
21 based prevalence of CKD in Nepal. Presence of CKD defined by using Kidney Disease  
22  
23 Outcomes Quality Initiative (KDOQI) clinical practice guideline criteria. A participant was  
24  
25 considered to have CKD if the Urine Albumin-to-Creatinine Ratio (uACR) was greater than or equal to  
26  
27 30 mg/g and/or estimated Glomerular Filtration Rate (e-GFR) is less than 60 mL/min/1.73 m<sup>2</sup> at baseline  
28  
29 and in follow up. The secondary outcome measure was factors associated with CKD in Nepal. The  
30  
31 co-variate adjusted association of risk factors and CKD was calculated using weighted  
32  
33 multivariable binary logistic regression.  
34  
35  
36  
37

38 **34 Results:** The overall weighted prevalence of CKD was 6.0%. (95% CI: 5.5-6.6), and was similar  
39  
40 across provinces. The prevalence of CKD was higher among male, participants with no formal  
41  
42 education, urban residents and religious minority group. Other factors independently associated  
43  
44 with CKD included older age, hypertension, diabetes, raised total cholesterol and increased  
45  
46 waist-to-hip ratio.  
47  
48  
49

50  
51 **39 Conclusion:** This nationally representative study shows that the prevalence of CKD in the adult  
52  
53 population of Nepal is substantial, and it is independently associated with several  
54  
55  
56  
57

1  
2  
3 41 cardiometabolic traits. These findings warrant longitudinal studies to identify the causes of CKD  
4  
5 42 in Nepal and effective strategies to prevent it.  
6  
7

8  
9 43 **Keywords:** Chronic Kidney Disease, Nepal, adults, prevalence, eGFR, serum creatinine  
10

#### 11 **Strengths and limitations of this study**

12

- 13 • This is the first large scale nationwide population-based prevalence of CKD in Nepal.
  - 14 • Strict training processes and vigorous quality assurance programs were used to ensure the  
15 quality of data collection
  - 16 • The use of standardized definitions of CKD as per Kidney Disease Outcomes Quality  
17 Initiative (KDOQI) clinical practice guideline facilitates international comparisons of  
18 CKD prevalence and risk factors.
  - 19 • High overall response rate
  - 20 • Causal inference is unknown
- 21  
22  
23  
24  
25  
26  
27  
28  
29  
30  
31  
32  
33  
34  
35  
36

37 44  
38  
39  
40  
41  
42  
43  
44  
45  
46  
47  
48  
49  
50  
51  
52  
53  
54  
55  
56  
57  
58  
59  
60

## 45 **Background**

46 Chronic Kidney Disease (CKD) is one of the most rapidly growing non-communicable diseases  
47 (NCDs) worldwide <sup>1</sup>. According to the Global Burden of Disease (GBD) study, CKD was the  
48 11<sup>th</sup> leading cause of death in 2019, up from 19<sup>th</sup> in 1990 accounting for 2.53% of total deaths<sup>2</sup>.  
49 CKD is also associated with substantial morbidity, mortality, and healthcare costs. Although it is  
50 largely preventable, over 9% of the population worldwide is estimated to be affected by the  
51 condition, particularly developing countries <sup>3,4</sup>, and it is associated with diabetes type II,  
52 hypertension and obesity, which are also growing at an alarming rate. The rapid increase of  
53 CKD is likely to impose a great socioeconomic and public health burden in resource-poor  
54 setting<sup>5</sup>.

55 The evidence on the prevalence of CKD in South East Asia is relatively limited, but it  
56 consistently shows a high prevalence of CKD<sup>6-8</sup>, however data remain poorly characterized due  
57 to inconsistent assessment of kidney function and nonstandard approaches which might distort  
58 the true estimates of CKD prevalence. There are few studies in Nepal already warned the higher  
59 prevalence of CKD<sup>9-11</sup> and reported data largely depends on the population studied (rural/  
60 urban/or general/at high risk group) methods and the lack of representativeness from the  
61 general population. Nepal has overcome many of the critical health challenges to survive the  
62 first five years of life, and that NCDs and burden of potential underlying risk factors such as  
63 obesity, hypertension, and diabetes and unhealthy lifestyle habits including poor diets are highly  
64 prevalent<sup>12</sup>.

65 Understanding the burden and risk factors associated with CKD is important for making health  
66 care planning, designing screening strategies, and prevention of these diseases in this resource



1  
2  
3 67 constrains setting, where access to renal replacement therapy is costly. Therefore, this study  
4  
5 68 aimed to determine the population based prevalence of CKD and its associated factors in Nepal.  
6  
7

## 8 9 **Methods**

### 10 11 **Study design and subjects**

12  
13 71 The Nepal Health Research Council designed and implemented the “National Population based  
14  
15 72 Prevalence Survey of Selected NCDs in Nepal”. This was a population-based survey to  
16  
17 73 investigate the prevalence of NCDs including CKD, chronic obstructive pulmonary disease  
18  
19 74 carried out between 2016 and 2018 in adult's  $\geq 20$  years old from seven provinces of the country.  
20  
21 75 Full details of the design and protocols of the survey are available elsewhere<sup>13</sup>.  
22  
23  
24

25  
26 76 The sample size for the survey was calculated taking as reference the prevalence of raised blood  
27  
28 77 glucose ( $p=4\%$ ) from NCD risk factors: STEPwise approach to Surveillance(STEPS) survey  
29  
30 78 2013<sup>14</sup>, Z value of 1.96 at 95% confidence level and margin of error (d) of 20%, design effect of  
31  
32 79 2, adjusting the sample across three domains of the Terai, hills and mountains and adding a non-  
33  
34 80 response rate of 20% yielded a sample size of 12,965. With a plan to enroll 33 participants in  
35  
36 81 each cluster (400), the final sample size was 13,200. A ward (lowest administrative unit of the -  
37  
38 82 then Village Development Committees (VDCs) and Municipalities) was considered as a cluster-  
39  
40 83 Primary Sampling Unit (PSU) of the study design. With the support from Central Bureau of  
41  
42 84 Statistics, a total of 400 clusters were sampled. The survey team members in the field used  
43  
44 85 official or socially mapped household list to select 33 households (Secondary Sampling Units –  
45  
46 86 SSUs) from each cluster using systematic random sampling. One participant out of the eligible  
47  
48 87 candidates ( $\geq 20$  years and above, resident in the study area at least 6 months and able to provide  
49  
50 88 informed consent) was selected to take part in the survey using the KISH method. Of 13,200  
51  
52 89 participants who were approached for interview, 12,557 responded to the invitation in Day 1,  
53  
54  
55  
56  
57  
58  
59  
60

1  
2  
3 90 Among 12,557 who accepted the invitation, only 12,148 participants responded in day 2 of  
4  
5 91 clinical setting. For the present study, data from 12,109 subjects were available for analyses, as  
6  
7 92 39 (0.32%) were excluded, because they refused providing blood and urine samples to evaluate  
8  
9 93 renal function in day 2.

#### 13 94 **Data collection and measurements**

15 95 Data collection was performed in 400 clusters within 72 districts of Nepal. Data collection teams  
16  
17 96 at each site consisted of five member having academic background of nursing, general medicine,  
18  
19 97 Bachelor in medical laboratory technology or public health.

23 98 Participants' appointment for face to face personal interview at convenient and accessible site or  
24  
25 99 at home on two occasions (Day 1 and Day 2): Following written informed consent, from the  
26  
27 100 participants in Day 1, a structured questionnaire was administered to collect information about  
28  
29 101 participants' general health and socio-demographic characteristics. Participants self-reported  
30  
31 102 their health and socio-demographic status, personal and family medical histories and history of  
32  
33 103 medicine used. Information concerning their lifestyle factors (cigarette smoking, alcohol intake)  
34  
35 104 was collected, and then physical and clinical measurements were performed. The clinical  
36  
37 105 examination included measurements of height, weight, waist hip ratio and blood pressure (BP)  
38  
39 106 following standard protocols. Height was measured in centimeters with a portable Bioplus®  
40  
41 107 stature meter and weight with a portable digital seca® 874 weighing scale (Seca, Germany) and  
42  
43 108 recorded in kilograms ensuring that the participant was wearing light clothes and was without  
44  
45 109 footwear. Waist circumference was measured using Seca tape in cm at the level midway between  
46  
47 110 the twelfth rib and the uppermost lateral border of the iliac crest during normal expiration. Blood  
48  
49 111 pressure was measured at least three times with a minimum 3 min, and then averaged to be  
50  
51 112 recorded by using an Omron digital automatic blood pressure monitor model HEM-8712 (Omron  
52  
53  
54  
55  
56  
57  
58  
59  
60

1  
2  
3 113 Health Care Co., Ltd, Japan) with appropriate sized cuffs <sup>15</sup>. Participants were classified as  
4  
5 114 hypertensive when the Raised BP is defined as having systolic BP  $\geq 140$  mm of Hg and/or  
6  
7 115 diastolic BP  $\geq 90$  mm of Hg during the study, or being previously diagnosed as having  
8  
9 116 hypertension.

10  
11  
12  
13 117 We used fasting, at least an 8-hour fast, and two hour post prandial (PP) blood sample to test  
14  
15 118 various biochemical parameters. Following aseptic technique, blood samples were drawn by a  
16  
17 119 trained enumerators using vacutainers to test laboratory parameters such as fasting blood glucose  
18  
19 120 level, PP blood glucose level, serum creatinine, total cholesterol (TC), triglyceride (TG), high  
20  
21 121 density lipoprotein (HDL) cholesterol, and serum creatinine. The well trained enumerators  
22  
23 122 collected around 10 ml of blood sample at the fasting state and provided 82 grams of glucose  
24  
25 123 monohydrate (equivalent to 75 grams of anhydrous glucose) in 250 ml water to drink. Second  
26  
27 124 blood sample was collected at 2 hours of glucose intake. Fasting blood glucose, TC, TG, HDL  
28  
29 125 cholesterol and serum creatinine were measured with the fasting sample and two hours PP  
30  
31 126 sample was used for measuring PP blood glucose only. We carried out biochemical analysis with  
32  
33 127 Biolyzer® 100 Clinical Chemistry Analyzer (Semi-automatic biochemistry analyzer, Analyticon,  
34  
35 128 Germany) and used glucose oxidase-peroxidase (GOD-POD) method for blood glucose,  
36  
37 129 cholesterol oxidase/phenol aminophenazone (CHOD-PAP) for TC, glycerol-3-phosphate  
38  
39 130 oxidase/phenol aminophenazone (GPO-PAP) for TG, HDL cholesterol by poly ethylene glycol/  
40  
41 131 cholesterol oxidase/ phenol aminophenazone (PEG/CHOD-PAP) and serum creatinine measured  
42  
43 132 by Jaffe Reaction method. The laboratory supervisors calculated the low-density lipoprotein  
44  
45 133 (LDL) cholesterol by Freidewald's Formula using TC, TG, and HDL cholesterol.  
46  
47  
48  
49  
50  
51  
52  
53  
54  
55  
56  
57  
58  
59  
60

## 134 **Outcome measurements**

135 A spot urine sample was collected from single voided specimen to measure urine albumin and  
136 creatinine using the same semi-automatic biochemistry analyzer (AnalyticonBiolyzer® 100  
137 Clinical Chemistry Analyzer, Germany). Laboratory supervisors measured urine albumin  
138 concentration by Turbidimetric tests and urine creatinine concentration by Jaffe Reaction method  
139 and finally albumin-creatinine ration (ACR) was calculated and expressed in mg/g. Renal  
140 function was evaluated by using estimated GFR (eGFR), based on the widely used 4-variable  
141 Modification of Diet in Renal Disease Study (MDRD) equation. To confirm CKD, we carried  
142 out a follow up test after three months of initial data collection of the participants with albumin  
143 creatinine ratio  $\geq 30$  mg/g. Initially the enumerators took written informed consent from the  
144 participants. Then they collected 5 ml blood and random urine samples from the participants  
145 using similar procedures as mentioned above.

146 A participant was considered to have CKD if the Urine Albumin-to-Creatinine Ratio (uACR)  
147 was greater than or equal to 30 mg/g and/or estimated Glomerular Filtration Rate (e-GFR) is less  
148 than 60 mL/min/1.73 m<sup>2</sup> at baseline and in follow up<sup>16</sup>. The secondary outcome measure was  
149 factors associated with CKD in Nepal

## 150 **Data management and analysis**

151 We used android mobile phones inbuilt with data collection software (REMO) to collect data  
152 digitally. Data cleaning including correction of inconsistencies was performed in SPSS version  
153 20.0. We then exported the dataset to STATA version 13 for analysis. To adjust for unequal  
154 distribution of selection and to produce estimates that are representative of the general  
155 (national) population, all the estimation was based on sampling weight. Results are expressed as  
156 a percentage and odds ratio with 95% CI. Bivariate analysis was conducted to analyze the

1  
2  
3 157 unconditional association between each explanatory variable and CKD status. To be included in  
4  
5 158 multivariable modeling, the level of significance  $\alpha=0.25$  was used during bivariate analysis (i.e.,  
6  
7 159 P-value 0.25 was not statistically significant). Independent variables included demographics  
8  
9  
10 160 (age, gender, ethnicity, education, province and place of residence), existing comorbidities  
11  
12 161 (hypertension, diabetes, raised total cholesterol, increased waist hip ratio), any hypertension, any  
13  
14 162 diabetes (self-reported or physician diagnosed [fasting blood glucose  $\geq 126$  mg/dl]), lifestyles  
15  
16 163 (smoking and alcohol consumption), overweight or obesity (Body Mass Index [BMI]  $\geq 25$   
17  
18 164 kg/m<sup>2</sup>).

19  
20  
21  
22 165 Multicollinearity, the variance inflation factor (VIF) was assessed for all the independent  
23  
24 166 variables found to be statistically significant from the bivariate analysis. Multivariable logistic  
25  
26 167 regression modeling was conducted with CKD as a dependent variable using the independent  
27  
28 168 variables identified as being statistically significant from the bivariate analysis.  
29  
30  
31

32 169

## 33 34 35 170 **Results**

36  
37  
38 171 A total of 12,109 subjects aged 20-60 years were included in the analyses. Among them 61.1%  
39  
40 172 were female, two fifth were adults in the age group 20-59 years (41.6%), one third was from  
41  
42 173 upper caste ethnic group (34.2%), and just above half of them were either illiterate or had no  
43  
44 174 formal schooling (54.6%). Detailed demographic characteristics of the study population  
45  
46 175 weighted to be representative of the Nepalese adult population are presented in Table 1.  
47  
48  
49

50 176 **Table 1: Socio-demographic characteristics of the study participants (N=12,109)**

| Characteristics | n | % |
|-----------------|---|---|
|-----------------|---|---|

|                                     |      |      |
|-------------------------------------|------|------|
| <b>Age</b>                          |      |      |
| 20-39 years                         | 4336 | 35.8 |
| 40-59 years                         | 5034 | 41.6 |
| 60 years and above                  | 2739 | 22.6 |
| <b>Sex</b>                          |      |      |
| Male                                | 4708 | 38.9 |
| Female                              | 7401 | 61.1 |
| <b>Ethnicity</b>                    |      |      |
| Upper caste group                   | 4144 | 34.2 |
| Disadvantaged janajati              | 2546 | 21.0 |
| Relatively advantaged janajati      | 2018 | 16.7 |
| Disadvantaged non-dalit terai caste | 1836 | 15.2 |
| Dalit                               | 1225 | 10.1 |
| Religious minorities                | 340  | 2.8  |
| <b>Education</b>                    |      |      |
| Illiterate/No formal schooling      | 6607 | 54.6 |

|                                        |      |      |
|----------------------------------------|------|------|
| Below secondary (<10 years)            | 2742 | 22.6 |
| Secondary and above ( $\geq 10$ years) | 2760 | 22.8 |
| <b>Province</b>                        |      |      |
| Province 1                             | 2049 | 16.9 |
| Province 2                             | 2003 | 16.5 |
| Bagmati Province                       | 3096 | 25.6 |
| Gandaki Province                       | 1315 | 10.9 |
| Lumbini Province                       | 2030 | 16.8 |
| Karnali Province                       | 588  | 4.9  |
| Sudurpashchim Province                 | 1028 | 8.5  |
| <b>Place of residence</b>              |      |      |
| Rural                                  | 6107 | 50.4 |
| Urban                                  | 6002 | 49.6 |

177

178

180 **Table 2: Bivariate and multivariable analysis of sociodemographic risk factors for CKD**  
 181 **among the study participants (N=12,109)**

| Characteristics         | Chronic Kidney Disease |            |                  |                 |             |
|-------------------------|------------------------|------------|------------------|-----------------|-------------|
|                         | N                      | n (%)      | COR<br>(95% CI)  | AOR<br>(95% CI) | p-<br>value |
| <b>Age</b>              |                        |            |                  |                 |             |
| 20-39 years             | 4336                   | 118 (2.6)  | 1( ref)          | 1               |             |
| 40-59 years             | 5034                   | 294 (5.8)  | 2.3(1.8-3.0)***  | 1.4(1.0-1.8)**  | 0.021       |
| 60 years and above      | 2739                   | 316 (11.5) | 4.9 (3.8-6.3)*** | 2.6(1.9-3.6)*** | 0.001       |
| <b>Sex</b>              |                        |            |                  |                 |             |
| Female                  | 7401                   | 415 (5.7)  | 1(ref)           |                 |             |
| Male                    | 4708                   | 313 (6.5)  | 1.2(1.0-1.4)     | 1.2 (0.8-1.6)   | 0.425       |
| <b>Ethnicity</b>        |                        |            |                  |                 |             |
| Upper caste             | 4144                   | 212 (5.1)  | 1(ref)           |                 |             |
| Disadvantaged Janajati  | 2546                   | 138 (5.4)  | 1.1(0.8-1.4)     | 1.1(0.9-1.5)    | 0.339       |
| Dalit                   | 1225                   | 84 (7.1)   | 1.4 (1.0-1.9)*   | 1.6 (1.1-2.3)   | 0.011       |
| Disadvantaged non-Dalit | 1836                   | 116 (6.4)  | 1.3(0.9-1.7)     | 1.4 ( 0.9-2.1)  | 0.114       |



|                                 |      |           |                  |                 |       |  |
|---------------------------------|------|-----------|------------------|-----------------|-------|--|
| terai caste                     |      |           |                  |                 |       |  |
| Religious minorities            | 340  | 25 (8.0)  | 1.6 (1.0-2.7)    | 1.7(1.0-2.9)    | 0.060 |  |
| Relatively advantaged Janajati  | 2018 | 153 (7.4) | 1.5(1.1-2.0)**   | 1.4(1.0-1.9)    | 0.028 |  |
| <b>Education</b>                |      |           |                  |                 |       |  |
| Illiterate/No formal schooling  | 6607 | 459 (7.0) | 1 (ref)          |                 |       |  |
| Below secondary (<10 years)     | 2742 | 146 (5.4) | 0.8(0.6-0.9)**   | 1.1 (0.9-1.5)   | 0.367 |  |
| Secondary and above (≥10 years) | 2760 | 123 (4.5) | 0.6( 0.5-0.8)*** | 1.1 ( 0.7-1.4)  | 0.894 |  |
| <b>Province</b>                 |      |           |                  |                 |       |  |
| Karnali Province                | 588  | 30 (4.7)  | 1 (ref)          |                 |       |  |
| Province 1                      | 2049 | 100 (5.2) | 1.1 (0.7-1.8)    | 1.1( 0.6-2.0)   | 0.728 |  |
| Province 2                      | 2003 | 133 (6.6) | 1.4(0.9-2.3)     | 1.2 (0.6-2.2)   | 0.578 |  |
| Bagmati Province                | 3096 | 196 (6.5) | 1.4(0.9-2.2)     | 1.1 ( 0.6-1.9 ) | 0.706 |  |
| Gandaki Province                | 1315 | 93 (6.8)  | 1.5 (0.9-2.3)    | 1.2 (0.7-2.0 )  | 0.575 |  |
| Lumbini Province                | 2030 | 118 (5.7) | 1.2(0.7-2.2)     | 0.9 (0.5-1.6)   | 0.705 |  |

|                           |      |           |              |               |       |
|---------------------------|------|-----------|--------------|---------------|-------|
| Sudurpashchim Province    | 1028 | 58(5.9)   | 1.3(0.7-2.2) | 1.4 (0.7-2.6) | 0.309 |
| <b>Place of residence</b> |      |           |              |               |       |
| Rural                     | 6107 | 341 (5.8) | 1 (ref)      | -             |       |
| Urban                     | 6002 | 387 (6.5) | 1.2(1.0-1.4) | 1.0( 0.8-1.3) | 0.894 |

182

For peer review only

184 **Table 3 Bivariate and multivariate analysis of Behavioral and biological characteristics for**  
 185 **CKD among the study participants (N=12,109)**

| Characteristics                      | Chronic Kidney Disease |            |                   |                  | p- value |
|--------------------------------------|------------------------|------------|-------------------|------------------|----------|
|                                      | N                      | n (%)      | COR (95%CI)       | AOR (95%CI)      |          |
| <b>Smoking habit</b>                 |                        |            |                   |                  |          |
| Non smoker                           | 8305                   | 443 (5.3)  | 1(ref)            | 1(ref)           |          |
| Smokers                              | 3804                   | 285 (7.6)  | 1.5(1.2-1.7)***   | 1.2(1.0-1.5)     | 0.104    |
| <b>Alcohol consumption</b>           |                        |            |                   |                  |          |
| No                                   | 9131                   | 537 (6.0)  | 1(ref)            |                  |          |
| Yes                                  | 2978                   | 191 (6.2)  | 1.0(0.9-1.2)      |                  |          |
| <b>Blood pressure</b>                |                        |            |                   |                  |          |
| Normal                               | 7754                   | 256 (3.3)  | 1(ref)            | 1(ref)           |          |
| Raised                               | 4355                   | 472 (10.8) | 3.6 (3.0-4.3) *** | 2.4 (2.0-3.0)*** | 0.001    |
| <b>Body mass index<br/>(N=12108)</b> |                        |            |                   |                  |          |
| Normal                               | 6896                   | 377 (5.5)  | 1 (ref)           | 1(ref)           |          |
| Underweight                          | 1494                   | 88 (6.2)   | 1.1(0.9-1.5) *    | 1.1(0.8-1.6)     | 0.531    |

|                                              |       |            |                   |                |       |
|----------------------------------------------|-------|------------|-------------------|----------------|-------|
| Overweight and obese                         | 3718  | 263 (6.9)  | 1.3(1.1-1.5) **   | 0.9 (0.7-1.1)  | 0.153 |
| <b>Total cholesterol</b><br><b>(N=10861)</b> |       |            |                   |                |       |
| Normal                                       | 7741  | 398 (5.2)  | 1(ref)            | 1(ref)         |       |
| Raised                                       | 3120  | 254 (8.2)  | 1.6(1.3-2.0) ***  | 1.3(1.0-1.6)** | 0.032 |
| <b>Waist hip ratio</b>                       |       |            |                   |                |       |
| Normal                                       | 5095  | 282 (5.4)  | ref               |                |       |
| Increased                                    | 6884  | 440 (6.6)  | 1.2(1.0-1.5 )     | 1.6( 1.2-2.3)  | 0.005 |
| <b>Diabetes Mellitus</b>                     |       |            |                   |                |       |
| No                                           | 10393 | 506 (4.8)  | 1(ref)            |                |       |
| Yes                                          | 878   | 172 (19.8) | 4.9( 3.8-6.2) *** | 3.2(2.5-4.1 )  | 0.001 |

186

### 187 Factors associated with CKD

188 The multivariable analyses to investigate the association of independent factors and CKD are  
189 shown in Table 3.

190 In the bivariate analysis, age, smoking, BMI, ethnicity, education, having diabetes mellitus  
191 (DM), being hypertensive and having raised cholesterol were found to be statistically  
192 significantly associated with CKD. Therefore, those 8 factors including place of residence and  
193 sex of participants (P-value  $\leq 0.25$ ) were considered in the multiple logistic models. After

1  
2  
3 194 adjustment, only six variables: age, ethnicity, diabetes, hypertension, raised TC, and increased  
4  
5 195 waist hip ratio, were found to be significant predictors of CKD. There was a strong positive  
6  
7 196 association between age and CKD, i.e. the odds of having CKD were about 1.4 (95% CI = 1.0-  
8  
9 1.8) and 2.6(95% CI= 1.9-3.6) times higher for people aged 40–59 years and  $\geq 60$  years  
10  
11 197 respectively, compared with people aged 20-39 years. Participants with DM had about 3.2 (95%  
12  
13 198 CI = 2.5-4.1) times higher odds of occurrence of CKD than non-diabetic participants. Similarly,  
14  
15 199 participants with raised BP had 2.4 (95% CI = 2.0-3.0) higher odds of having CKD than non-  
16  
17 200 hypertensive/normal participants.  
18  
19 201

20  
21  
22 202 Participants with raised total cholesterol had 1.3 (95% CI = 1.0-1.6) times higher odds of having  
23  
24 203 CKD relative to participants who had normal cholesterol level, whereas those with raised waist  
25  
26 204 hip ratio had 1.6(95% CI: 1.2-2.3) times higher odds than normal participants to have CKD.  
27  
28 205 Individuals who were classified as Dalit by ethnicity were 1.6 (95% CI: 1.1-2.3) times or  
29  
30 206 relatively advantaged janajati had 1.4 (OR = 95% CI: 1.0-1.9) times higher odds of having CKD  
31  
32 207 when compared to individuals with an upper caste.  
33  
34  
35  
36

## 37 208 **Discussion**

38  
39 209 This is the first large scale nationwide population based representative study to report prevalence  
40  
41 210 of and factors associated with CKD in Nepal among population aged 20 years and above. CKD  
42  
43 211 was prevalent among 6% of the population. Moreover, increased age, diabetes, hypertension,  
44  
45 212 raised TC, increased waist hip ratio, and education were independently associated to it.  
46  
47  
48

49 213 The findings show that approximately one every sixteen adults in Nepal is affected by CKD.  
50  
51 214 This value is higher than the 4.7% found in Ghana <sup>17</sup> , similar to 6.8% in South Korea <sup>18</sup> , but  
52  
53 215 much lower than the prevalence of many south Asian countries with 29.9% in Pakistan <sup>8</sup> , 26.2 %  
54  
55  
56  
57

1  
2  
3 216 in Bangladesh <sup>19</sup> and 17.2 % in India <sup>20</sup>. However, a comparison between studies depends on the  
4  
5 217 CKD diagnostic criteria, study design, and methodology. It is also lower than the prevalence  
6  
7 218 reported by a community-based study in eastern part of Nepal <sup>11</sup>. We hypothesized some reasons  
9  
10 219 for the lower prevalence of CKD noted in our study compared to studies from India, Pakistan  
11  
12 220 and eastern Nepal. Most of these previous studies were restricted to more of urban centric,  
13  
14 221 specific setting (e.g. hospital) , occupations and age where prevalence of risk factors are higher  
15  
16  
17 222 <sup>6,19,21-23</sup>.

18  
19  
20 223 CKD was not found to be associated with gender in our targeted participants. Earlier literature in  
21  
22 224 this regard has shown different findings. The association between CKD and gender has been  
23  
24 225 reported in some other studies<sup>24-26</sup>.

26  
27  
28 226 We also could not find significant association between CKD and alcohol consumption, place of  
29  
30 227 residence, and provinces. Compared to rural settings, CKD seems to be more prevalent in urban  
31  
32 228 areas despite the lack of statistical difference as rapid and unplanned urbanization, has  
33  
34 229 contributed to the rise of kidney disease and other NCDs in Nepal which has led to lifestyles  
35  
36 230 characterized by unhealthy nutrition, reduced physical activity and tobacco and alcohol  
37  
38 231 consumption. However, the prevalence of CKD was not much different among provinces of  
39  
40 232 Nepal.

41  
42  
43  
44  
45 233 In our study, CKD was more common in participants having lower education level and those  
46  
47 234 from Relatively Advantaged Janajati and Dalit; however, the association was not found to be  
48  
49 235 statistically significant. The association between smoking and CKD was supported by evidence  
50  
51 236 of a dose-response relationship<sup>27,28</sup>. The association between smoking and CKD was reported in  
52  
53 237 bivariate analysis only in our study and remained marginally significant in multivariable

1  
2  
3 238 analysis. Our multivariable analysis found that CKD was independently associated with older  
4  
5 239 age, hypertension, diabetes, raised TC and increased waist hip ratio ( $p < 0.05$  for each) which are  
6  
7 240 all major NCDs risk factors and consistent with previous findings<sup>29–33</sup>.

9  
10  
11 241 Age is a well-established risk factor for development of CKD<sup>34</sup>. As expected, age was found to  
12  
13 242 be the most strongly associated risk factor in our study, we observed nearly three times higher  
14  
15 243 odds of occurrence of CKD among people aged 60 years or older compared to people aged 20 to  
16  
17 244 39 years. Generally, as a part of the normal physiologic process, renal function (GFR) starts to  
18  
19 245 decline even in a healthy individual by 1 mL /min/1.73 m<sup>2</sup> per year after the age of 30 years<sup>35</sup>. A  
20  
21 246 similar steep increase in CKD prevalence by age has also been reported by others<sup>36–38</sup>.

22  
23  
24  
25 247 The number of patients with kidney failure treated by dialysis and transplantation has increased  
26  
27 248 dramatically in Nepal. Because of the costs, limited ability to afford dialysis and the complexity  
28  
29 249 of its treatment, very few patients are able to obtain adequate treatment, and CKD places a heavy  
30  
31 250 financial burden on any individual and society<sup>39,40</sup>. Furthermore, there are many challenges  
32  
33 251 concerning prevention and management kidney diseases in Nepal, firstly we currently lack  
34  
35 252 population –based epidemiological data and national registry of kidney diseases. In order to  
36  
37 253 reduce the frequency of disease occurrence, project the management needs of those who would  
38  
39 254 acquire the disease, there is need of a data of its prevalence and associated factors to the extent  
40  
41 255 possible and such knowledge only be obtained from population-based epidemiological studies.

42  
43  
44  
45  
46  
47 256 The increase in prevalence of CKD and its progression to end-stage renal failure worldwide are  
48  
49 257 mainly a result of the rising global diabetes and hypertension pandemic. In line with other  
50  
51 258 surveys in South East Asia, our findings show that the odds of CKD occurrence was significantly  
52  
53 259 and independently higher by around 2-fold with the presence of hypertension; this supports

1  
2  
3 260 previous reports<sup>35,41–43</sup> indicating the importance of early detection and treatment of hypertension  
4  
5 261 in Nepal. In our study people with diabetes mellitus had more than three times higher odds of  
6  
7 262 occurrence of CKD than people without diabetes. Almost one fifth of people with diabetes had  
8  
9 263 CKD as well. Supporting findings from our research, studies around the world indicate diabetes  
10  
11 264 is independently associated with development of CKD<sup>44,45</sup>. A survey across 10 Asian countries  
12  
13 265 showed that the most common cause of End Stage Renal Disease ( ESRD) in 9 out of 10  
14  
15 266 countries was diabetic nephropathy<sup>46</sup>. In addition; elevated total cholesterol was substantially  
16  
17 267 associated with higher odds for CKD.  
18  
19  
20  
21

22 268 Despite finding an association between CKD and several known established risk factors  
23  
24 269 including waist hip ratio, no association was found between CKD and BMI. The correlation  
25  
26 270 between CKD and waist hip ratio and not BMI is plausible since this ratio is a more sensitive  
27  
28 271 marker for central obesity ,metabolic syndrome and potentially less influenced by muscle mass  
29  
30 272 than BMI, this is in agreement with earlier studies<sup>47–49</sup>.  
31  
32  
33  
34

35 273 Evidence suggested that the adverse outcomes of CKD can be prevented or altered through  
36  
37 274 therapeutic interventions during early stages, including regular BP control, blood glucose control  
38  
39 275 in diabetic patient, treatment with angiotensin-receptor blockers and angiotensin-converting  
40  
41 276 enzyme inhibitors and, dietary protein restriction. Given the double burden of disease and the  
42  
43 277 early onset of NCDs in the country – at age 40 people are already having CKD and other co-  
44  
45 278 morbidities, as shown in this manuscript, these findings have important medical and public-  
46  
47 279 health implications, in targeting these “high-risk” population subgroup of the population, to  
48  
49 280 reduce progression and delay the onset of cardiovascular complications and ESRD<sup>50</sup>.  
50  
51  
52  
53  
54  
55  
56  
57  
58  
59  
60



1  
2  
3 281 Our study poses several strengths. To the best of our knowledge, no national survey of CKD has  
4  
5 282 been done in the context of Nepal as per Kidney Disease Outcomes Quality Initiative (KDOQI)  
6  
7 283 clinical practice guideline; using (eGFR  $<60\text{mL}/\text{min}/1.73\text{m}^2$ , presence of albuminuria  $\geq 30\text{mg}/\text{g}$   
8  
9 284 and chronicity confirmed by repeated testing after three months) to confirm presence of CKD.  
10  
11 285 This is the first study to report prevalence of CKD using a validated standardized estimation of  
12  
13 286 the glomerular filtration rate by the MDRD study equation which is carried out in a large  
14  
15 287 representative population-based sample of the adult population in Nepal following the strict  
16  
17 288 guideline and protocols, strict training processes and vigorous quality assurance programs were  
18  
19 289 used to ensure the quality of data collection. Additional strengths of the study include a high  
20  
21 290 overall response rate and analyses based on survey weights which ensure geographic  
22  
23 291 representativeness of the study. Thus, our findings would be generalizable to the general  
24  
25 292 population. However, the limitations of our analysis definitely deserve comment; potential  
26  
27 293 limitations include dependency on estimation of GFR, rather than direct measurement using  
28  
29 294 injection of an exogenous marker factors as well as cross-sectional design of the study which  
30  
31 295 does not permit inferences regarding causal relationships.  
32  
33  
34  
35  
36  
37

## 38 296 **Conclusions**

39  
40  
41 297 This is the first population-based epidemiological survey of CKD using the protocols  
42  
43 298 recommended by KDOQI in Nepal. The prevalence of CKD was found to be 6.0%. CKD was  
44  
45 299 independently associated with older age, hypertension, diabetes mellitus, increased waist hip  
46  
47 300 ratio and raised total cholesterol. Our findings highlight the need for early preventive measures  
48  
49 301 to manage predisposing conditions such as diabetes and hypertension which could ultimately  
50  
51 302 lead to CKD and to reduce the prevalence and mortality arising from the associated  
52  
53 303 comorbidities in Nepal.  
54  
55  
56  
57  
58  
59  
60

1  
2  
3 304  
4  
56 305 **Declarations**

7  
8 306 **Acknowledgements:** The authors would like to thank all the individuals and organizations that  
9  
10 307 provided technical support for the design and implementation of the main survey. The authors  
11  
12 308 are grateful Dr. Shiva raj Mishra, Research Fellow in Epidemiology and Intervention Melbourne  
13  
14 309 School of Population and Global Health, for reviewing the manuscript for language and  
15  
16 310 grammar.  
17  
18

19  
20  
21 311 **Funding:** The authors have not received specific grant from any agency for this research.  
22  
23

24 312 **Competing interests:** The authors declare no conflict of interest.  
25  
26

27 313 **Data sharing statement:** The datasets used and/or analyzed will be made from the  
28  
29 314 corresponding author on reasonable request  
30  
31

32 315 **Author's contributions:** KBK, KKA and MD conceived the study. LG and DKC helped in data  
33  
34 316 entry and management. AP, BB and NS was involved in conducting data analysis. AP wrote the  
35  
36 317 manuscript. AKJ supported in monitoring overall data quality. PG, VGL, UK, DAG and SKS  
37  
38 318 revised and edited the manuscript. Each author provided intellectual content during manuscript  
39  
40 319 drafting and revision, accepts accountability for their contributions.  
41  
42  
43  
44

45 320 **Ethics statement:** The study protocol was approved by the Ethical Review Board (ERB) of  
46  
47 321 Nepal Health Research Council, Government of Nepal (Reg.no.110/2016). Written informed  
48  
49 322 consent was taken from all participants before proceeding for data collection.  
50  
51

52 323 **Patient and public involvement:** Patients and/or the public were not involved in the design, or  
53  
54 324 conduct, or reporting, or dissemination plans of this research.  
55  
56  
57

1  
2  
3  
4  
5  
6  
7  
8  
9  
10  
11  
12  
13  
14  
15  
16  
17  
18  
19  
20  
21  
22  
23  
24  
25  
26  
27  
28  
29  
30  
31  
32  
33  
34  
35  
36  
37  
38  
39  
40  
41  
42  
43  
44  
45  
46  
47  
48  
49  
50  
51  
52  
53  
54  
55  
56  
57  
58  
59  
60

325 **Patient consent for publication:** Not required.

For peer review only

326 **References**

- 327 1. Xie Y, Bowe B, Mokdad AH, et al. Analysis of the Global Burden of Disease study  
328 highlights the global, regional, and national trends of chronic kidney disease epidemiology  
329 from 1990 to 2016. *Kidney Int.* 2018;94(3):567-581.
- 330 2. Institute for Health Metrics and Evaluation (IHME). *GBD Compare Data.*; 2019.
- 331 3. Bikbov B, Purcell CA, Levey AS, et al. Global, regional, and national burden of chronic  
332 kidney disease, 1990--2017: a systematic analysis for the Global Burden of Disease Study  
333 2017. *Lancet.* 2020;395(10225):709-733.
- 334 4. Stanifer JW, Muiru A, Jafar TH, Patel UD. Chronic kidney disease in low-and middle-  
335 income countries. *Nephrol Dial Transplant.* 2016;31(6):868-874.
- 336 5. Nugent RA, Fathima SF, Feigl AB, Chyung D. The burden of chronic kidney disease on  
337 developing nations: a 21st century challenge in global health. *Nephron Clin Pract.*  
338 2011;118(3):c269--c277.
- 339 6. Agarwal SK, Dash SC, Irshad M, Raju S, Singh R, Pandey RM. Prevalence of chronic  
340 renal failure in adults in Delhi, India. *Nephrol Dial Transplant.* 2005;20(8):1638-1642.
- 341 7. Singh NP, Ingle GK, Saini VK, et al. Prevalence of low glomerular filtration rate,  
342 proteinuria and associated risk factors in North India using Cockcroft-Gault and  
343 Modification of Diet in Renal Disease equation: an observational, cross-sectional study.  
344 *BMC Nephrol.* 2009;10(1):1-13.
- 345 8. Jafar TH, Schmid CH, Levey AS. Serum creatinine as marker of kidney function in South  
346 Asians: a study of reduced GFR in adults in Pakistan. *J Am Soc Nephrol.*

- 1  
2  
3 347 2005;16(5):1413-1419.  
4  
5  
6 348 9. Sharma SK, Zou H, Togtokh A, et al. Burden of CKD, proteinuria, and cardiovascular risk  
7  
8 349 among Chinese, Mongolian, and Nepalese participants in the International Society of  
9  
10 350 Nephrology screening programs. *Am J kidney Dis.* 2010;56(5):915-927.  
11  
12  
13  
14 351 10. Ene-Iordache B, Perico N, Bikbov B, et al. Chronic kidney disease and cardiovascular risk  
15  
16 352 in six regions of the world (ISN-KDDC): a cross-sectional study. *Lancet Glob Heal.*  
17  
18 353 2016;4(5):e307--e319.  
19  
20  
21  
22 354 11. Sharma SK, Dhakal S, Thapa L, et al. Community-based screening for chronic kidney  
23  
24 355 disease, hypertension and diabetes in Dharan. Published online 2013.  
25  
26  
27 356 12. Dhimal M, Bista B, Bhattarai S, Dixit LP, Hyder MKA, Agrawal N, Rani M JA. *Non*  
28  
29 357 *Communicable Disease Risk Factors: STEPS Survey Nepal 2019.*  
30  
31  
32 358 13. Nepal Health Research Council. *Population Based Prevalence of Selected Non-*  
33  
34 359 *Communicable Disease in Nepal.*; 2019. [http://nhrc.gov.np/publication/population-based-](http://nhrc.gov.np/publication/population-based-prevalence-of-selected-non-communicable-diseases-in-nepal/)  
35  
36 360 [prevalence-of-selected-non-communicable-diseases-in-nepal/](http://nhrc.gov.np/publication/population-based-prevalence-of-selected-non-communicable-diseases-in-nepal/)  
37  
38  
39  
40 361 14. Aryal KK, Neupane S, Mehata S, et al. Non communicable diseases risk factors: STEPS  
41  
42 362 Survey Nepal 2013 Kathmandu. *Nepal Nepal Heal Res Counc Sch.* Published online 2014.  
43  
44  
45  
46 363 15. Chobanian A V, Bakris GL, Black HR, et al. Seventh report of the joint national  
47  
48 364 committee on prevention, detection, evaluation, and treatment of high blood pressure.  
49  
50 365 *Hypertension.* 2003;42(6):1206-1252.  
51  
52  
53  
54 366 16. Levey AS, Eckardt K-U, Tsukamoto Y, et al. Definition and classification of chronic  
55  
56 367 kidney disease: a position statement from Kidney Disease: Improving Global Outcomes  
57

- 1  
2  
3 368 (KDIGO). *Kidney Int.* 2005;67(6):2089-2100.  
4  
5  
6 369 17. Eastwood JB, Kerry SM, Plange-Rhule J, et al. Assessment of GFR by four methods in  
7  
8 370 adults in Ashanti, Ghana: the need for an eGFR equation for lean African populations.  
9  
10 371 *Nephrol Dial Transplant.* 2010;25(7):2178-2187.  
11  
12  
13  
14 372 18. Jang SY, Kim I-H, Ju EY, Ahn SJ, Kim D-K, Lee SW. Chronic kidney disease and  
15  
16 373 metabolic syndrome in a general Korean population: the Third Korea National Health and  
17  
18 374 Nutrition Examination Survey (KNHANES III) Study. *J Public Health (Bangkok).*  
19  
20 375 2010;32(4):538-546.  
21  
22  
23  
24 376 19. Anand S, Khanam MA, Saquib J, et al. High prevalence of chronic kidney disease in a  
25  
26 377 community survey of urban Bangladeshis: a cross-sectional study. *Global Health.*  
27  
28 378 2014;10(1):1-7.  
29  
30  
31  
32 379 20. Singh AK, Farag YMK, Mittal B V, et al. Epidemiology and risk factors of chronic kidney  
33  
34 380 disease in India--results from the SEEK (Screening and Early Evaluation of Kidney  
35  
36 381 Disease) study. *BMC Nephrol.* 2013;14(1):1-10.  
37  
38  
39  
40 382 21. Anand S, Shivashankar R, Ali MK, et al. Prevalence of chronic kidney disease in two  
41  
42 383 major Indian cities and projections for associated cardiovascular disease. *Kidney Int.*  
43  
44 384 2015;88(1):178-185.  
45  
46  
47 385 22. O'Donnell JK, Tobey M, Weiner DE, et al. Prevalence of and risk factors for chronic  
48  
49 386 kidney disease in rural Nicaragua. *Nephrol Dial Transplant.* 2011;26(9):2798-2805.  
50  
51  
52  
53 387 23. Perkovic V, Cass A, Patel AA, et al. High prevalence of chronic kidney disease in  
54  
55 388 Thailand. *Kidney Int.* 2008;73(4):473-479.  
56  
57

- 1  
2  
3 389 24. Chadban SJ, Briganti EM, Kerr PG, et al. Prevalence of kidney damage in Australian  
4  
5 390 adults: The AusDiab kidney study. *J Am Soc Nephrol*. 2003;14(suppl 2):S131--S138.  
6  
7  
8 391 25. Viktorsdottir O, Palsson R, Andresdottir MB, Aspelund T, Gudnason V, Indridason OS.  
9  
10 392 Prevalence of chronic kidney disease based on estimated glomerular filtration rate and  
11  
12 393 proteinuria in Icelandic adults. *Nephrol Dial Transplant*. 2005;20(9):1799-1807.  
13  
14  
15  
16 394 26. Tomlinson LA, Clase CM. Sex and the incidence and prevalence of kidney disease.  
17  
18 395 Published online 2019.  
19  
20  
21 396 27. Briganti EM, Branley P, Chadban SJ, et al. Smoking is associated with renal impairment  
22  
23 397 and proteinuria in the normal population: The AusDiab kidney study. *Am J Kidney Dis*.  
24  
25 398 2002;40(4):704-712.  
26  
27  
28  
29 399 28. Shankar A, Klein R, Klein BEK. The association among smoking, heavy drinking, and  
30  
31 400 chronic kidney disease. *Am J Epidemiol*. 2006;164(3):263-271.  
32  
33  
34  
35 401 29. Ping H, Zhang X, Xing N. Prevalence of chronic kidney disease in China. *Lancet*.  
36  
37 402 2012;380(9838):216.  
38  
39  
40 403 30. Jessani S, Bux R, Jafar TH. Prevalence, determinants, and management of chronic kidney  
41  
42 404 disease in Karachi, Pakistan-a community based cross-sectional study. *BMC Nephrol*.  
43  
44 405 2014;15(1):1-9.  
45  
46  
47  
48 406 31. Okwuonu CG, Chukwuonye II, Adejumo OA, Agaba EI, Ojogwu LI, others. Prevalence  
49  
50 407 of chronic kidney disease and its risk factors among adults in a semi-urban community of  
51  
52 408 South-East Nigeria. *Niger Postgrad Med J*. 2017;24(2):81.  
53  
54  
55  
56 409 32. Alkerwi A, Sauvageot N, El Bahi I, et al. Prevalence and related risk factors of chronic  
57  
58  
59  
60

- 1  
2  
3 410 kidney disease among adults in Luxembourg: evidence from the observation of  
4  
5 411 cardiovascular risk factors (ORISCAV-LUX) study. *BMC Nephrol.* 2017;18(1):1-10.  
6  
7  
8 412 33. Hill NR, Fatoba ST, Oke JL, et al. Global prevalence of chronic kidney disease--a  
9  
10 413 systematic review and meta-analysis. *PLoS One.* 2016;11(7):e0158765.  
11  
12  
13  
14 414 34. O'Hare AM, Choi AI, Bertenthal D, et al. Age affects outcomes in chronic kidney disease.  
15  
16 415 *J Am Soc Nephrol.* 2007;18(10):2758-2765.  
17  
18  
19 416 35. Price CP, Finney H. Developments in the assessment of glomerular filtration rate. *Clin*  
20  
21 417 *Chim acta.* 2000;297(1-2):55-66.  
22  
23  
24  
25 418 36. Garg AX, Papaioannou A, Ferko N, Campbell G, Clarke J-A, Ray JG. Estimating the  
26  
27 419 prevalence of renal insufficiency in seniors requiring long-term care. *Kidney Int.*  
28  
29 420 2004;65(2):649-653.  
30  
31  
32  
33 421 37. Wasen E, Isoaho R, Mattila K, Vahlberg T, Kivelä S-L, Irjala K. Estimation of glomerular  
34  
35 422 filtration rate in the elderly: a comparison of creatinine-based formulae with serum  
36  
37 423 cystatin C. *J Intern Med.* 2004;256(1):70-78.  
38  
39  
40 424 38. Hemmelgarn BR, Zhang J, Manns BJ, et al. Progression of kidney dysfunction in the  
41  
42 425 community-dwelling elderly. *Kidney Int.* 2006;69(12):2155-2161.  
43  
44  
45  
46 426 39. Mishra D, Koirala P. Status of chronic kidney disease patients registered in National  
47  
48 427 Kidney Center, Banasthali, Kathmandu. *J Manmohan Meml Inst Heal Sci.* 2015;1(4):19-  
49  
50 428 23.  
51  
52  
53  
54 429 40. Tang SCW, Yu X, Chen HC, et al. Dialysis care and dialysis funding in Asia. *Am J*  
55  
56 430 *Kidney Dis.* 2020;75(5):772-781.  
57



- 1  
2  
3 431 41. Li Z-Y, Xu G-B, Xia T-A, Wang H-Y. Prevalence of chronic kidney disease in a middle  
4  
5 432 and old-aged population of Beijing. *Clin Chim acta*. 2006;366(1-2):209-215.  
6  
7  
8 433 42. Safarinejad MR, others. The epidemiology of adult chronic kidney disease in a  
9  
10 434 population-based study in Iran: prevalence and associated risk factors. *JN J Nephrol*.  
11  
12 435 2009;22(1):99.  
13  
14  
15  
16 436 43. Fiseha T, Kassim M, Yemane T. Prevalence of chronic kidney disease and associated risk  
17  
18 437 factors among diabetic patients in southern Ethiopia. *Am J Heal Res*. 2014;2(4):216-221.  
19  
20  
21 438 44. Damtie S, Biadgo B, Baynes HW, et al. Chronic kidney disease and associated risk factors  
22  
23 439 assessment among diabetes mellitus patients at a tertiary hospital, Northwest Ethiopia.  
24  
25 440 *Ethiop J Health Sci*. 2018;28(6).  
26  
27  
28  
29 441 45. Duan J, Wang C, Liu D, et al. Prevalence and risk factors of chronic kidney disease and  
30  
31 442 diabetic kidney disease in Chinese rural residents: a cross-sectional survey. *Sci Rep*.  
32  
33 443 2019;9(1):1-11.  
34  
35  
36  
37 444 46. Lee G. End-stage renal disease in the Asian-Pacific region. In: *Seminars in*  
38  
39 445 *Nephrologyjournal*. Vol 23. ; 2003:107-114.  
40  
41  
42  
43 446 47. Elsayed EF, Tighiouart H, Weiner DE, et al. Waist-to-hip ratio and body mass index as  
44  
45 447 risk factors for cardiovascular events in CKD. *Am J Kidney Dis*. 2008;52(1):49-57.  
46  
47  
48 448 48. He Y, Li F, Wang F, Ma X, Zhao X, Zeng Q. The association of chronic kidney disease  
49  
50 449 and waist circumference and waist-to-height ratio in Chinese urban adults. *Medicine*  
51  
52 450 *(Baltimore)*. 2016;95(25).  
53  
54  
55  
56 451 49. Silva MIB, da Silva Lemos CC, Torres MRSG, Bregman R. Waist-to-height ratio: an

1  
2  
3 452 accurate anthropometric index of abdominal adiposity and a predictor of high HOMA-IR  
4  
5 453 values in nondialyzed chronic kidney disease patients. *Nutrition*. 2014;30(3):279-285.  
6  
7  
8 454 50. Hallan SI, Dahl K, Oien CM, et al. Screening strategies for chronic kidney disease in the  
9  
10 455 general population: follow-up of cross sectional health survey. *Bmj*. 2006;333(7577):1047.  
11  
12  
13  
14 456  
15  
16  
17 457  
18  
19  
20 458  
21  
22  
23 459  
24  
25  
26 460  
27  
28  
29 461  
30  
31  
32 462  
33  
34  
35 463  
36  
37  
38 464  
39  
40  
41 465  
42  
43  
44 466  
45  
46  
47 467  
48  
49  
50 468  
51  
52  
53 469  
54  
55  
56  
57  
58  
59  
60

1  
2  
3  
4  
5  
6  
7  
8  
9  
10  
11  
12  
13  
14  
15  
16  
17  
18  
19  
20  
21  
22  
23  
24  
25  
26  
27  
28  
29  
30  
31  
32  
33  
34  
35  
36  
37  
38  
39  
40  
41  
42  
43  
44  
45  
46  
47  
48  
49  
50  
51  
52  
53  
54  
55  
56  
57  
58  
59  
60

470

471

For peer review only

STROBE Statement—Checklist of items that should be included in reports of *cross-sectional studies*

|                              | Item No | Recommendation                                                                                                                                                                                    | Page No |
|------------------------------|---------|---------------------------------------------------------------------------------------------------------------------------------------------------------------------------------------------------|---------|
| <b>Title and abstract</b>    | 1       | (a) Indicate the study's design with a commonly used term in the title or the abstract                                                                                                            | 2       |
|                              |         | (b) Provide in the abstract an informative and balanced summary of what was done and what was found                                                                                               | 2-3     |
| <b>Introduction</b>          |         |                                                                                                                                                                                                   |         |
| Background/rationale         | 2       | Explain the scientific background and rationale for the investigation being reported                                                                                                              | 4-5     |
| Objectives                   | 3       | State specific objectives, including any prespecified hypotheses                                                                                                                                  | 5       |
| <b>Methods</b>               |         |                                                                                                                                                                                                   |         |
| Study design                 | 4       | Present key elements of study design early in the paper                                                                                                                                           | 5-6     |
| Setting                      | 5       | Describe the setting, locations, and relevant dates, including periods of recruitment, exposure, follow-up, and data collection                                                                   | 5-7     |
| Participants                 | 6       | (a) Give the eligibility criteria, and the sources and methods of selection of participants                                                                                                       | 5-6     |
| Variables                    | 7       | Clearly define all outcomes, exposures, predictors, potential confounders, and effect modifiers. Give diagnostic criteria, if applicable                                                          | 8       |
| Data sources/<br>measurement | 8*      | For each variable of interest, give sources of data and details of methods of assessment (measurement). Describe comparability of assessment methods if there is more than one group              | 8-9     |
| Bias                         | 9       | Describe any efforts to address potential sources of bias                                                                                                                                         | 8-9     |
| Study size                   | 10      | Explain how the study size was arrived at                                                                                                                                                         | 5-6     |
| Quantitative variables       | 11      | Explain how quantitative variables were handled in the analyses. If applicable, describe which groupings were chosen and why                                                                      | 8-9     |
| Statistical methods          | 12      | (a) Describe all statistical methods, including those used to control for confounding                                                                                                             | 8-9     |
|                              |         | (b) Describe any methods used to examine subgroups and interactions                                                                                                                               | 8-9     |
|                              |         | (c) Explain how missing data were addressed                                                                                                                                                       | 10      |
|                              |         | (d) If applicable, describe analytical methods taking account of sampling strategy                                                                                                                | 5       |
|                              |         | (e) Describe any sensitivity analyses                                                                                                                                                             | na      |
| <b>Results</b>               |         |                                                                                                                                                                                                   |         |
| Participants                 | 13*     | (a) Report numbers of individuals at each stage of study—eg numbers potentially eligible, examined for eligibility, confirmed eligible, included in the study, completing follow-up, and analysed | 5-6     |
|                              |         | (b) Give reasons for non-participation at each stage                                                                                                                                              | 5-7     |
|                              |         | (c) Consider use of a flow diagram                                                                                                                                                                | na      |
| Descriptive data             | 14*     | (a) Give characteristics of study participants (eg demographic, clinical, social) and information on exposures and potential confounders                                                          | 10-17   |
|                              |         | (b) Indicate number of participants with missing data for each variable of interest                                                                                                               | 10-17   |
| Outcome data                 | 15*     | Report numbers of outcome events or summary measures                                                                                                                                              | 10-17   |
| Main results                 | 16      | (a) Give unadjusted estimates and, if applicable, confounder-adjusted estimates and their precision (eg, 95% confidence interval). Make clear                                                     | 10-17   |

|                          |    |                                                                                                                                                                            |       |
|--------------------------|----|----------------------------------------------------------------------------------------------------------------------------------------------------------------------------|-------|
|                          |    | which confounders were adjusted for and why they were included                                                                                                             |       |
|                          |    | (b) Report category boundaries when continuous variables were categorized                                                                                                  | 10-17 |
|                          |    | (c) If relevant, consider translating estimates of relative risk into absolute risk for a meaningful time period                                                           | na    |
| Other analyses           | 17 | Report other analyses done—eg analyses of subgroups and interactions, and sensitivity analyses                                                                             | 10-17 |
| <b>Discussion</b>        |    |                                                                                                                                                                            |       |
| Key results              | 18 | Summarise key results with reference to study objectives                                                                                                                   | 17    |
| Limitations              | 19 | Discuss limitations of the study, taking into account sources of potential bias or imprecision. Discuss both direction and magnitude of any potential bias                 | 21    |
| Interpretation           | 20 | Give a cautious overall interpretation of results considering objectives, limitations, multiplicity of analyses, results from similar studies, and other relevant evidence | 17-21 |
| Generalisability         | 21 | Discuss the generalisability (external validity) of the study results                                                                                                      | 21    |
| <b>Other information</b> |    |                                                                                                                                                                            |       |
| Funding                  | 22 | Give the source of funding and the role of the funders for the present study and, if applicable, for the original study on which the present article is based              | 22    |

\*Give information separately for exposed and unexposed groups.

**Note:** An Explanation and Elaboration article discusses each checklist item and gives methodological background and published examples of transparent reporting. The STROBE checklist is best used in conjunction with this article (freely available on the Web sites of PLoS Medicine at <http://www.plosmedicine.org/>, Annals of Internal Medicine at <http://www.annals.org/>, and Epidemiology at <http://www.epidem.com/>). Information on the STROBE Initiative is available at [www.strobe-statement.org](http://www.strobe-statement.org).

# BMJ Open

## Prevalence and Risk Factors Associated with Chronic Kidney Disease in Nepal: Evidence from a Nationally Representative Population Based Study

|                                 |                                                                                                                                                                                                                                                                                                                                                                                                                                                                                                                                                                                                                                                                                                                                                                                                                                                                                                                                                                                                                                                                                                                                                                                                                                                                                                                                                                                                                                                                      |
|---------------------------------|----------------------------------------------------------------------------------------------------------------------------------------------------------------------------------------------------------------------------------------------------------------------------------------------------------------------------------------------------------------------------------------------------------------------------------------------------------------------------------------------------------------------------------------------------------------------------------------------------------------------------------------------------------------------------------------------------------------------------------------------------------------------------------------------------------------------------------------------------------------------------------------------------------------------------------------------------------------------------------------------------------------------------------------------------------------------------------------------------------------------------------------------------------------------------------------------------------------------------------------------------------------------------------------------------------------------------------------------------------------------------------------------------------------------------------------------------------------------|
| Journal:                        | <i>BMJ Open</i>                                                                                                                                                                                                                                                                                                                                                                                                                                                                                                                                                                                                                                                                                                                                                                                                                                                                                                                                                                                                                                                                                                                                                                                                                                                                                                                                                                                                                                                      |
| Manuscript ID                   | bmjopen-2021-057509.R1                                                                                                                                                                                                                                                                                                                                                                                                                                                                                                                                                                                                                                                                                                                                                                                                                                                                                                                                                                                                                                                                                                                                                                                                                                                                                                                                                                                                                                               |
| Article Type:                   | Original research                                                                                                                                                                                                                                                                                                                                                                                                                                                                                                                                                                                                                                                                                                                                                                                                                                                                                                                                                                                                                                                                                                                                                                                                                                                                                                                                                                                                                                                    |
| Date Submitted by the Author:   | 10-Dec-2021                                                                                                                                                                                                                                                                                                                                                                                                                                                                                                                                                                                                                                                                                                                                                                                                                                                                                                                                                                                                                                                                                                                                                                                                                                                                                                                                                                                                                                                          |
| Complete List of Authors:       | <p>Poudyal, Anil; Nepal Health Research Council<br/> Karki, Khem; Goethe University Frankfurt Institute of Occupational Social and Environmental Medicine; Department of Community Medicine, Maharajgunj Medical Campus, Kathmandu, Nepal<br/> Shrestha, Namuna; Public Health Promotion and Development Organization;<br/> Aryal, KK; MOMENTUM Country and Global Leadership, Save the Children Nepal, Kathmandu, Nepal, Research Section<br/> Mahato, Namra ; Nepal Health Research Council<br/> Bista, Bihungum; Nepal Health Research Council, Research<br/> Ghimire, Laxmi; Sanjeevani College of Medical Sciences<br/> K.C., Dirghayu; Public Health Promotion and Development Organization. Kathmandu, Nepal, Research<br/> Gyanwali, Pradip ; Nepal Health Research Council<br/> Jha, Anjani; Nepal Health Research Council<br/> Garcia Larsen, Vanessa; Johns Hopkins University Bloomberg School of Public Health, International Health<br/> Kuch, Ulrich; Goethe University Frankfurt Institute of Occupational Social and Environmental Medicine, Social and Environmental Medicine<br/> Groneberg, David; Goethe University Frankfurt Institute of Occupational Social and Environmental Medicine<br/> Sharma, Sanjib Kumar; BP Koirala Institute of Health Sciences, Department of Internal Medicine<br/> Dhimal, Meghnath; Nepal Health Research Council; Goethe University Frankfurt Institute of Occupational Social and Environmental Medicine</p> |
| <b>Primary Subject Heading</b>: | Renal medicine                                                                                                                                                                                                                                                                                                                                                                                                                                                                                                                                                                                                                                                                                                                                                                                                                                                                                                                                                                                                                                                                                                                                                                                                                                                                                                                                                                                                                                                       |
| Secondary Subject Heading:      | Urology                                                                                                                                                                                                                                                                                                                                                                                                                                                                                                                                                                                                                                                                                                                                                                                                                                                                                                                                                                                                                                                                                                                                                                                                                                                                                                                                                                                                                                                              |
| Keywords:                       | Chronic renal failure < NEPHROLOGY, Dialysis < NEPHROLOGY, Glomerulonephritis < NEPHROLOGY, Renal transplantation < NEPHROLOGY                                                                                                                                                                                                                                                                                                                                                                                                                                                                                                                                                                                                                                                                                                                                                                                                                                                                                                                                                                                                                                                                                                                                                                                                                                                                                                                                       |
|                                 |                                                                                                                                                                                                                                                                                                                                                                                                                                                                                                                                                                                                                                                                                                                                                                                                                                                                                                                                                                                                                                                                                                                                                                                                                                                                                                                                                                                                                                                                      |

1  
2  
3  
4  
5  
6  
7  
8  
9  
10  
11  
12  
13  
14  
15  
16  
17  
18  
19  
20  
21  
22  
23  
24  
25  
26  
27  
28  
29  
30  
31  
32  
33  
34  
35  
36  
37  
38  
39  
40  
41  
42  
43  
44  
45  
46  
47  
48  
49  
50  
51  
52  
53  
54  
55  
56  
57  
58  
59  
60

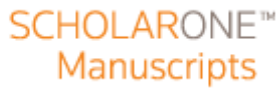



I, the Submitting Author has the right to grant and does grant on behalf of all authors of the Work (as defined in the below author licence), an exclusive licence and/or a non-exclusive licence for contributions from authors who are: i) UK Crown employees; ii) where BMJ has agreed a CC-BY licence shall apply, and/or iii) in accordance with the terms applicable for US Federal Government officers or employees acting as part of their official duties; on a worldwide, perpetual, irrevocable, royalty-free basis to BMJ Publishing Group Ltd ("BMJ") its licensees and where the relevant Journal is co-owned by BMJ to the co-owners of the Journal, to publish the Work in this journal and any other BMJ products and to exploit all rights, as set out in our [licence](#).

The Submitting Author accepts and understands that any supply made under these terms is made by BMJ to the Submitting Author unless you are acting as an employee on behalf of your employer or a postgraduate student of an affiliated institution which is paying any applicable article publishing charge ("APC") for Open Access articles. Where the Submitting Author wishes to make the Work available on an Open Access basis (and intends to pay the relevant APC), the terms of reuse of such Open Access shall be governed by a Creative Commons licence – details of these licences and which [Creative Commons](#) licence will apply to this Work are set out in our licence referred to above.

Other than as permitted in any relevant BMJ Author's Self Archiving Policies, I confirm this Work has not been accepted for publication elsewhere, is not being considered for publication elsewhere and does not duplicate material already published. I confirm all authors consent to publication of this Work and authorise the granting of this licence.



1  
2  
3  
4 1 **Prevalence and Risk Factors Associated with Chronic Kidney Disease in Nepal: Evidence**  
5  
6 2 **from a Nationally Representative Population Based Cross sectional Study**  
7

8  
9 3 Anil Poudyal<sup>1\*#</sup>, Khem Bahadur Karki<sup>1,2,3#</sup>, Namuna Shrestha<sup>4</sup>, Krishna Kumar Aryal<sup>5</sup>, Namra  
10  
11 4 Kumar Mahato<sup>1</sup>, Bihungum Bista<sup>1</sup>, Laxmi Ghimire<sup>6</sup>, Dirghayu KC<sup>4</sup>, Pradip Gyanwali<sup>1</sup>, Anjani  
12  
13 5 Kumar Jha<sup>1</sup>, Vanessa Garcia-Larsen<sup>7</sup>, Ulrich Kuch<sup>3</sup>, David A, Groneberg<sup>3</sup>, Sanjib Kumar Sharma<sup>8</sup>,  
14  
15 6 Meghnath Dhimal<sup>1,3\*</sup>

16  
17  
18  
19 7 **# Equal contributors**  
20  
21

22 8 <sup>1</sup> Nepal Health Research Council (NHRC), Ramshah Path, Kathmandu, Nepal  
23  
24

25 9 <sup>2</sup> Department of Community Medicine, Maharajgunj Medical Campus, Kathmandu, Nepal  
26  
27

28 10 <sup>3</sup> Institute of Occupational, Social and Environmental Medicine, Goethe University, Frankfurt am  
29  
30 11 Main, Germany  
31  
32

33  
34 12 <sup>4</sup> Public Health Promotion and Development Organization. Kathmandu, Nepal  
35  
36

37 13 <sup>5</sup> MOMENTUM Country and Global Leadership, Save the Children Nepal, Kathmandu, Nepal  
38  
39

40 14 <sup>6</sup> Sanjeevani College of Medical Sciences, Rupandehi, Nepal  
41  
42

43 15 <sup>7</sup> Department of International Health, The Johns Hopkins Bloomberg School of Public Health,  
44  
45 16 Baltimore, Maryland, USA  
46  
47

48 17 <sup>8</sup> Department of Internal Medicine, BP Koirala Institute of Health Sciences, Dharan, Nepal  
49  
50

51  
52 18 **\*Corresponding Author:** Anil poudyal( Email: [poudyalanil123@gmail.com](mailto:poudyalanil123@gmail.com))  
53  
54

55 19  
56  
57

## 20 Abstract

21 **Objective:** This study aimed to determine population based prevalence of Chronic Kidney Disease  
22 (CKD) and its associated factors in Nepal.

23 **Study Design:** The study was a nationwide population-based cross sectional study

24 **Setting & Participants:** Cross-sectional survey conducted in a nationally representative sample  
25 of 12109 Nepalese adult from 2016 to 2018 on selected chronic non-communicable diseases were  
26 examined. Multistage cluster sampling with a mix of probability proportionate to size (PPS) and  
27 systematic random sampling was used for the selection of individuals aged 20 years and above.

28 **Primary and secondary outcome measures:** Primary outcome in this study was population based  
29 prevalence of CKD in Nepal. A participant was considered to have CKD if the Urine Albumin-to-  
30 Creatinine Ratio (uACR) was greater than or equal to 30 mg/g and/or estimated Glomerular  
31 Filtration Rate (e-GFR) is less than 60 mL/min/1.73 m<sup>2</sup> at baseline and in follow up using  
32 modification of diet in renal disease study (MDRD) equations. The secondary outcome measure  
33 was factors associated with CKD in Nepal. The co-variate adjusted association of risk factors and  
34 CKD was calculated using multivariable binary logistic regression.

35 **Results:** The overall prevalence of CKD in Nepal was 6.0% (95% CI: 5.5-6.6). Factors  
36 independently associated with CKD included older age, (adjusted OR (AOR) 2.6, 95% CI: 1.9 to  
37 3.6), Dalit caste (AOR 1.6, 95% CI: 1.1 to 2.3), hypertension, (AOR 2.4, 95% CI: 2.0 to 3.0)  
38 diabetes mellitus (AOR 3.2, 95% CI: 2.5 to 4.1), raised total cholesterol (AOR 1.3, 95% CI: 1.0 to  
39 1.6) and increased waist-to-hip ratio (AOR 1.6, 95% CI: 1.2 to 2.3).

40 **Conclusion:** This nationally representative study shows that the prevalence of CKD in the adult  
41 population of Nepal is substantial, and it is independently associated with several cardiometabolic

1  
2  
3 42 traits. These findings warrant longitudinal studies to identify the causes of CKD in Nepal and  
4  
5 43 effective strategies to prevent it.  
6  
7

8  
9 44 **Keywords:** Chronic Kidney Disease, Nepal, adults, prevalence, eGFR, serum creatinine  
10

#### 11 **Strengths and limitations of this study**

12

- 13 • This is the first large scale nationwide population-based prevalence of CKD in Nepal.
  - 14 • Strict training processes and vigorous quality assurance programs were used to ensure  
15 the quality of data collection
  - 16 • The use of standardized definitions of CKD facilitates international comparisons of CKD  
17 prevalence and risk factors.
  - 18 • High overall response rate of 91.7. % in first visit and 86.9% in follow up visit.
  - 19 • Causal inference is unknown
- 20  
21  
22  
23  
24  
25  
26  
27  
28  
29  
30  
31  
32  
33  
34

35 45  
36  
37  
38  
39  
40  
41  
42  
43  
44  
45  
46  
47  
48  
49  
50  
51  
52  
53  
54  
55  
56  
57  
58  
59  
60

## 46 **Background**

47 Chronic Kidney Disease (CKD) is one of the most rapidly growing non-communicable diseases  
48 (NCDs) worldwide <sup>1</sup>. According to the Global Burden of Disease (GBD) study, CKD was the  
49 11<sup>th</sup> leading cause of death in 2019, up from 19<sup>th</sup> in 1990 accounting for 2.53% of total deaths<sup>2</sup>.  
50 CKD is also associated with substantial morbidity, mortality, and healthcare costs. Although it is  
51 largely preventable, over 9% of the population worldwide is estimated to be affected by the  
52 condition, particularly developing countries <sup>3,4</sup>, and it is associated with diabetes type II,  
53 hypertension and obesity, which are also growing at an alarming rate. The rapid increase of CKD  
54 is likely to impose a great socioeconomic and public health burden in in resource-poor setting<sup>5</sup>.  
55 The evidence on the prevalence of CKD in South East Asia is relatively limited, but it consistently  
56 shows a high prevalence of CKD<sup>6-8</sup>, however data remain poorly characterized due to inconsistent  
57 assessment of kidney function and nonstandard approaches which might distort the true estimates  
58 of CKD prevalence. There are few studies in Nepal already warned the higher prevalence of CKD<sup>9-</sup>  
59 <sup>11</sup> and reported data largely depends on the population studied (rural/ urban/or general/at high risk  
60 group) methods and the lack of representativeness from the general population. Nepal has  
61 overcome many of the critical health challenges to survive the first five years of life, and that  
62 NCDs and burden of potential underlying risk factors such as obesity, hypertension, and diabetes  
63 and unhealthy lifestyle habits including poor diets are highly prevalent<sup>12</sup>.  
64 Understanding the burden and risk factors associated with CKD is important for making health  
65 care planning, designing screening strategies, and prevention of these diseases in this resource  
66 constrains setting, where access to renal replacement therapy is costly. Therefore, this study aimed  
67 to determine the population based prevalence of CKD and its associated factors in Nepal.

## 68 **Methods**

### 69 **Study design and subjects**

70 The Nepal Health Research Council designed and implemented the “National Population based  
71 Prevalence Survey of Selected NCDs in Nepal”. This was a population-based survey to investigate  
72 the prevalence of NCDs including CKD, chronic obstructive pulmonary disease carried out  
73 between 2016 and 2018 in adult's  $\geq 20$  years old from seven provinces of the country. Full details  
74 of the design and protocols of the survey are available elsewhere<sup>13</sup>.

### 75 **Participants, sample size, and study setting**

76 The sample size for the survey was calculated taking as reference the prevalence of raised blood  
77 glucose ( $p=4\%$ ) from NCD risk factors: STEPwise approach to Surveillance(STEPS) survey  
78 2013<sup>14</sup>, Z value of 1.96 at 95% confidence level and margin of error (d) of 20%, design effect of  
79 2, adjusting the sample across three domains of the Terai, hills and mountains and adding a non-  
80 response rate of 20% yielded a sample size of 12,965. With a plan to enroll 33 participants in each  
81 cluster (400), the final sample size was 13,200. A ward (lowest administrative unit of the -then  
82 Village Development Committees (VDCs) and Municipalities) was considered as a cluster-  
83 Primary Sampling Unit (PSU) of the study design. With the support from Central Bureau of  
84 Statistics, a total of 400 clusters were sampled. To select a representative sample of cluster; the  
85 rural and urban areas within each region were identified as the main sampling strata and the sample  
86 was selected in two stages in which ecological belts (Terai, Hill and Mountains) and five  
87 development region (Central, Eastern, Mid-Western, Western and Far western), stratification was  
88 taken into account.

1  
2  
3 89 The survey team members in the field used official or socially mapped household list to select 33  
4  
5 90 households (Secondary Sampling Units – SSUs) from each cluster using systematic random  
6  
7  
8 91 sampling. One participant out of the eligible candidates ( $\geq 20$  years and above, resident in the study  
9  
10 92 area at least 6 months and able to provide informed consent) was selected to take part in the survey  
11  
12 93 using the KISH method. Of 13,200 participants who were approached for interview, 12,557  
13  
14 94 responded to the invitation in Day 1, Among 12,557 who accepted the invitation, only 12,148  
15  
16 95 participants responded in day 2 of clinical setting. For the present study, data from 12,109 subjects  
17  
18 96 were available for analyses with a response rate of 91.7%, 39 (0.32%) were excluded, because they  
19  
20 97 refused providing blood and urine samples to evaluate renal function in day 2.  
21  
22  
23

24 98 Data weighting was carried out to make the sampled population comparable to the national  
25  
26 99 population. Data weighting was done using sampling weight. Sample weighting was carried out  
27  
28 100 for probabilities of selection of Primary sampling unit (Ward/cluster), selection of households, and  
29  
30 101 selection of an individual in a household using 2011 population for Nepal with the support from  
31  
32 102 Central Bureau of Statistics.  
33  
34  
35

### 36 37 103 **Data collection and measurements**

38  
39 104 Data collection was performed in 400 clusters (figure 1) within 72 districts of Nepal. Data  
40  
41 105 collection teams at each site consisted of five member having academic background of nursing,  
42  
43 106 general medicine, Bachelor in medical laboratory technology or public health.  
44  
45  
46

47 107 Participants' appointment for face to face personal interview at convenient and accessible site or  
48  
49 108 at home on two occasions (Day 1 and Day 2): Following written informed consent, from the  
50  
51 109 participants in Day 1, a structured questionnaire was administered to collect information about  
52  
53 110 participants' general health and socio-demographic characteristics. Participants self-reported their  
54  
55  
56  
57

1  
2  
3 111 health and socio-demographic status, personal and family medical histories and history of  
4  
5 112 medicine used. Information concerning their lifestyle factors (cigarette smoking, alcohol intake)  
6  
7  
8 113 was collected, and then physical and clinical measurements were performed. The clinical  
9  
10 114 examination included measurements of height, weight, waist hip ratio and blood pressure (BP)  
11  
12 115 following standard protocols. Height was measured in centimeters with a portable Bioplus®  
13  
14 116 stature meter and weight with a portable digital seca® 874 weighing scale (Seca, Germany) and  
15  
16 117 recorded in kilograms ensuring that the participant was wearing light clothes and was without  
17  
18 118 footwear. Waist circumference was measured using Seca tape in cm at the level midway between  
19  
20 119 the twelfth rib and the uppermost lateral border of the iliac crest during normal expiration. Blood  
21  
22 120 pressure was measured at least three times with a minimum 3 min, and then averaged to be  
23  
24 121 recorded by using an Omron digital automatic blood pressure monitor model HEM-8712 (Omron  
25  
26 122 Health Care Co., Ltd, Japan) with appropriate sized cuffs <sup>15</sup>. Participants were classified as  
27  
28 123 hypertensive when the Raised BP is defined as having systolic BP  $\geq 140$  mm of Hg and/or diastolic  
29  
30 124 BP  $\geq 90$  mm of Hg during the study, or being previously diagnosed as having hypertension.  
31  
32  
33  
34  
35

36 125 We used fasting, at least an 8-hour fast, and two hour post prandial (PP) blood sample to test  
37  
38 126 various biochemical parameters. Following aseptic technique, blood samples were drawn by a  
39  
40 127 trained enumerators using vacutainers to test laboratory parameters such as fasting blood glucose  
41  
42 128 level, PP blood glucose level, serum creatinine, total cholesterol (TC), triglyceride (TG), high  
43  
44 129 density lipoprotein (HDL) cholesterol, and serum creatinine. The well trained enumerators  
45  
46 130 collected around 10 ml of blood sample at the fasting state and provided 82 grams of glucose  
47  
48 131 monohydrate (equivalent to 75 grams of anhydrous glucose) in 250 ml water to drink. Second  
49  
50 132 blood sample was collected at 2 hours of glucose intake. Fasting blood glucose, TC, TG, HDL  
51  
52 133 cholesterol and serum creatinine were measured with the fasting sample and two hours PP sample  
53  
54  
55  
56  
57  
58  
59  
60

1  
2  
3 134 was used for measuring PP blood glucose only. We carried out biochemical analysis with  
4  
5 135 Biolyzer® 100 Clinical Chemistry Analyzer (Semi-automatic biochemistry analyzer, Analyticon,  
6  
7 136 Germany) and used glucose oxidase-peroxidase (GOD-POD) method for blood glucose,  
8  
9 137 cholesterol oxidase/phenol aminophenazone (CHOD-PAP) for TC, glycerol-3-phosphate  
10  
11 138 oxidase/phenol aminophenazone (GPO-PAP) for TG, HDL cholesterol by poly ethylene glycol/  
12  
13 139 cholesterol oxidase/ phenol aminophenazone (PEG/CHOD-PAP) and serum creatinine measured  
14  
15 140 by Jaffe Reaction method. The laboratory supervisors calculated the low-density lipoprotein  
16  
17 141 (LDL) cholesterol by Freidewald's Formula using TC, TG, and HDL cholesterol.  
18  
19  
20  
21

## 22 142 **Outcome measurements**

23  
24 143 A spot urine sample was collected from single voided specimen to measure urine albumin and  
25  
26 144 creatinine using the same semi-automatic biochemistry analyzer (AnalyticonBiolyzer® 100  
27  
28 145 Clinical Chemistry Analyzer, Germany). Laboratory supervisors measured urine albumin  
29  
30 146 concentration by Turbidimetric tests and urine creatinine concentration by Jaffe Reaction method  
31  
32 147 and finally albumin-creatinine ratio (ACR) was calculated and expressed in mg/g. Renal function  
33  
34 148 was evaluated by using estimated GFR (eGFR), based on the widely used 4-variable Modification  
35  
36 149 of Diet in Renal Disease Study (MDRD) equation. A participant was considered to have CKD if  
37  
38 150 the Urine Albumin-to-Creatinine Ratio (uACR) was greater than or equal to 30 mg/g and/or  
39  
40 151 estimated Glomerular Filtration Rate (e-GFR) was less than 60 mL/min/1.73 m<sup>2</sup> at baseline and in  
41  
42 152 follow up<sup>16</sup>. The secondary outcome measure was factors associated with CKD in Nepal  
43  
44  
45  
46  
47  
48

## 49 153 **Follow up of study participants to determine CKD**

50  
51 154 Participants having albumin-creatinine ratio (ACR) greater than or equal to 30 mg/g in the baseline  
52  
53 155 were revisited again after 3 months in their place of residence to ensure the chronicity of the renal  
54  
55  
56  
57



1  
2  
3 156 disease. Written consent was taken prior to blood and urine sample collection using similar  
4  
5 157 procedures as mentioned above. Out of 1382 participants having a high ACR ratio in the baseline,  
6  
7 158 1202 gave consent. However, data of ACR was missing for 8 participants making the  
8  
9 159 availability of complete data for 1194 participants for analysis, with a response rate of 86.9%.

### 13 160 **Data management and analysis**

15 161 We used android mobile phones inbuilt with data collection software (REMO) to collect data  
16  
17 162 digitally. Data cleaning including correction of inconsistencies was performed in SPSS version  
18  
19 163 20.0. We then exported the dataset to STATA version 13 for analysis. To adjust for unequal  
20  
21 164 probability of selection, appropriate sampling weights with complex sampling analysis were used  
22  
23 165 to provide valid estimates for the relevant Nepalese population which is based on 2011 national  
24  
25 166 population and housing census data. Results are expressed as a percentage and odds ratio with 95%  
26  
27 167 CI. Bivariate analysis was conducted to analyze the unconditional association between each  
28  
29 168 explanatory variable and CKD status. To be included in multivariable modeling, the level of  
30  
31 169 significance  $\alpha=0.25$  was used during bivariate analysis (i.e., P-value 0.25 was not statistically  
32  
33 170 significant). Independent variables included demographics (age, gender, ethnicity, education,  
34  
35 171 province and place of residence), existing comorbidities (hypertension, diabetes, raised total  
36  
37 172 cholesterol, increased waist hip ratio), any hypertension, any diabetes (self-reported or physician  
38  
39 173 diagnosed [fasting blood glucose  $\geq 126$  mg/dl]), lifestyles (smoking and alcohol consumption),  
40  
41 174 overweight or obesity (Body Mass Index [BMI]  $\geq 25$  kg/m<sup>2</sup>).

42  
43 175 Ethnicity/ caste data were self-reported and categorized into six major groups based on the caste  
44  
45 176 coding by government of Nepal and STEPS survey Nepal, 2013 categorization<sup>17</sup>. (1) Upper Caste  
46  
47 177 Groups (population with relatively higher socio economic and education status, mostly Brahmins,  
48  
49 178 Chhetris, Thakuri and Sanyasi);(2) Disadvantaged Janajatis (disadvantaged group of people and

1  
2  
3 179 also indigenous, with relatively lower socio-economic and education status);(3) Dalit  
4  
5 180 (untouchables, most disadvantaged marginalized group of people, with relatively lower socio-  
6  
7 181 economic and education status); (4) Disadvantaged non Dalit Terai Caste Groups (disadvantaged  
8  
9 182 group of people from the Terai, the lowlands, with relatively lower socio-economic and education  
10  
11 183 status but not the dalit groups); (5)Religious Minorities (Muslim, Christian, etc.); (6) Relatively  
12  
13 184 advantaged Janajatis (indigenous group of people with relatively higher socio-economic status,  
14  
15 185 such as Gurung , Newar and Thakali)  
16  
17  
18  
19

20 186 Multicollinearity, the variance inflation factor (VIF) was assessed for all the independent variables  
21  
22 187 found to be statistically significant from the bivariate analysis. Multivariable logistic regression  
23  
24 188 modeling was conducted with CKD as a dependent variable using the independent variables  
25  
26 189 identified as being statistically significant from the bivariate analysis.  
27  
28  
29

30 190  
31  
32

### 33 191 **Results**

34  
35 192 A total of 12,109 subjects aged 20 years and above were included in the analyses. Among them  
36  
37 193 61.1% were female, two fifth were adults in the age group 20-59 years (41.6%), one third was  
38  
39 194 from upper caste ethnic group (34.2%), and just above half of them were either illiterate or had no  
40  
41 195 formal schooling (54.6%). Table 1 presents the unweighted numbers and proportions of different  
42  
43 196 demographic characteristics of the study population as measured in the study.  
44  
45  
46  
47

48 197  
49  
50  
51  
52  
53  
54  
55  
56  
57

198 **Table 1: Socio-demographic characteristics of the study participants (N=12,109)**

| <b>Characteristics</b>              | <b>n</b> | <b>%</b> |
|-------------------------------------|----------|----------|
| <b>Age</b>                          |          |          |
| 20-39 years                         | 4336     | 35.8     |
| 40-59 years                         | 5034     | 41.6     |
| 60 years and above                  | 2739     | 22.6     |
| <b>Sex</b>                          |          |          |
| Male                                | 4708     | 38.9     |
| Female                              | 7401     | 61.1     |
| <b>Ethnicity</b>                    |          |          |
| Upper caste group                   | 4144     | 34.2     |
| Disadvantaged janajati              | 2546     | 21.0     |
| Relatively advantaged janajati      | 2018     | 16.7     |
| Disadvantaged non-dalit terai caste | 1836     | 15.2     |
| Dalit                               | 1225     | 10.1     |
| Religious minorities                | 340      | 2.8      |
| <b>Education</b>                    |          |          |

|                                        |      |      |
|----------------------------------------|------|------|
| Illiterate/No formal schooling         | 6607 | 54.6 |
| Below secondary (<10 years)            | 2742 | 22.6 |
| Secondary and above ( $\geq 10$ years) | 2760 | 22.8 |
| <b>Province</b>                        |      |      |
| Province 1                             | 2049 | 16.9 |
| Province 2                             | 2003 | 16.5 |
| Bagmati Province                       | 3096 | 25.6 |
| Gandaki Province                       | 1315 | 10.9 |
| Lumbini Province                       | 2030 | 16.8 |
| Karnali Province                       | 588  | 4.9  |
| Sudurpaschim Province                  | 1028 | 8.5  |
| <b>Place of residence</b>              |      |      |
| Rural                                  | 6107 | 50.4 |
| Urban                                  | 6002 | 49.6 |

199

200

201

202 **Table 2 Factors associated with chronic kidney disease by univariate and multivariate**  
 203 **analysis (N = 12109)**

| Characteristics                          | Count | Chronic Kidney Diseases(CKD) |                  |                  |
|------------------------------------------|-------|------------------------------|------------------|------------------|
|                                          | N     | CKD prevalence (n %)         | COR (95% CI)     | AOR(95% CI)      |
| <b>Age</b>                               |       |                              |                  |                  |
| 20-39 years                              | 4336  | 118 (2.6)                    | 1                | 1                |
| 40-59 years                              | 5034  | 294 (5.8)                    | 2.3(1.8-3.0)***  | 1.4(1.0-1.8)*    |
| 60 years and above                       | 2739  | 316 (11.5)                   | 4.9 (3.8-6.3)*** | 2.6(1.9-3.6)***  |
| <b>Sex</b>                               |       |                              |                  |                  |
| Female                                   | 7401  | 415 (5.7)                    | 1                | 1                |
| Male                                     | 4708  | 313 (6.5)                    | 1.2(1.0-1.4)     | 1.2 (0.8-1.6)    |
| <b>Ethnicity</b>                         |       |                              |                  |                  |
| Upper caste                              | 4144  | 212 (5.1)                    | 1                | 1                |
| Disadvantaged<br>Janajati                | 2546  | 138 (5.4)                    | 1.1(0.8-1.4)     | 1.1(0.9-1.5)     |
| Dalit                                    | 1225  | 84 (7.1)                     | 1.4 (1.0-1.9)*   | 1.6 (1.1-2.3) ** |
| Disadvantaged<br>non-Dalitterai<br>caste | 1836  | 116 (6.4)                    | 1.3(0.9-1.7)     | 1.4 ( 0.9-2.1)   |
| Religious<br>minorities                  | 340   | 25 (8.0)                     | 1.6 (1.0-2.7)    | 1.7(1.0-2.9)     |

|                                      |                                 |      |           |                  |                 |
|--------------------------------------|---------------------------------|------|-----------|------------------|-----------------|
| 1<br>2<br>3<br>4<br>5<br>6<br>7<br>8 | Relatively advantaged Janajati  | 2018 | 153 (7.4) | 1.5(1.1-2.0)*    | 1.4(1.0-1.9)*   |
| 9                                    | <b>Education</b>                |      |           |                  |                 |
| 10<br>11<br>12<br>13<br>14<br>15     | Illiterate/No formal schooling  | 6607 | 459 (7.0) | 1                | 1               |
| 16<br>17<br>18<br>19<br>20           | Below secondary (<10 years)     | 2742 | 146 (5.4) | 0.8(0.6-0.9)**   | 1.1 (0.9-1.5)   |
| 21<br>22<br>23<br>24                 | Secondary and above (≥10 years) | 2760 | 123 (4.5) | 0.6( 0.5-0.8)*** | 1.1 ( 0.7-1.4)  |
| 25                                   | <b>Province</b>                 |      |           |                  |                 |
| 26<br>27<br>28<br>29<br>30           | Karnali Province                | 588  | 30 (4.7)  | 1                | 1               |
| 31<br>32<br>33                       | Province 1                      | 2049 | 100 (5.2) | 1.1 (0.7-1.8)    | 1.1( 0.6-2.0)   |
| 34<br>35<br>36                       | Province 2                      | 2003 | 133 (6.6) | 1.4(0.9-2.3)     | 1.2 (0.6-2.2)   |
| 37<br>38<br>39                       | Bagmati Province                | 3096 | 196 (6.5) | 1.4(0.9-2.2)     | 1.1 ( 0.6-1.9 ) |
| 40<br>41<br>42                       | Gandaki Province                | 1315 | 93 (6.8)  | 1.5 (0.9-2.3)    | 1.2 (0.7-2.0 )  |
| 43<br>44<br>45                       | Lumbini Province                | 2030 | 118 (5.7) | 1.2(0.7-2.2)     | 0.9 (0.5-1.6 )  |
| 46<br>47<br>48<br>49                 | Sudurpashchim Province          | 1028 | 58(5.9)   | 1.3(0.7-2.2)     | 1.4 (0.7-2.6)   |
| 50                                   | <b>Place of residence</b>       |      |           |                  |                 |
| 51<br>52<br>53<br>54<br>55<br>56     | Rural                           | 6107 | 341 (5.8) | 1                | 1               |

|                                     |      |            |                   |                  |
|-------------------------------------|------|------------|-------------------|------------------|
| Urban                               | 6002 | 387 (6.5)  | 1.2(1.0-1.4)      | 1.0( 0.8-1.3)    |
| <b>Smoking habit</b>                |      |            |                   |                  |
| Non smoker                          | 8305 | 443 (5.3)  | 1                 | 1                |
| Smokers                             | 3804 | 285 (7.6)  | 1.5(1.2-1.7)***   | 1.2(1.0-1.5)     |
| <b>Alcohol consumption</b>          |      |            |                   |                  |
| No                                  | 9131 | 537 (6.0)  | 1                 | 1                |
| Yes                                 | 2978 | 191 (6.2)  | 1.0(0.9-1.2)      |                  |
| <b>Blood pressure</b>               |      |            |                   |                  |
| Normal                              | 7754 | 256 (3.3)  | 1                 | 1                |
| Raised                              | 4355 | 472 (10.8) | 3.6 (3.0-4.3) *** | 2.4 (2.0-3.0)*** |
| <b>Body mass index (N=12108)#</b>   |      |            |                   |                  |
| Normal                              | 6896 | 377 (5.5)  | 1                 | 1                |
| Underweight                         | 1494 | 88 (6.2)   | 1.1(0.9-1.5)      | 1.1(0.8-1.6)     |
| Overweight and obese                | 3718 | 263 (6.9)  | 1.3(1.1-1.5) **   | 0.9 (0.7-1.1)    |
| <b>Total cholesterol (N=10861)#</b> |      |            |                   |                  |
| Normal                              | 7741 | 398 (5.2)  | 1                 | 1                |

|                                        |       |                        |                   |                 |
|----------------------------------------|-------|------------------------|-------------------|-----------------|
| Raised                                 | 3120  | 254 (8.2)              | 1.6(1.3-2.0) ***  | 1.3(1.0-1.6)*   |
| <b>Waist hip ratio</b><br>(N=11979)#   |       |                        |                   |                 |
| Normal                                 | 5095  | 282 (5.4)              | 1                 | 1               |
| Increased                              | 6884  | 440 (6.6)              | 1.2(1.0-1.5) *    | 1.6( 1.2-2.3) * |
| <b>Diabetes Mellitus</b><br>(N=11271)# |       |                        |                   |                 |
| No                                     | 10393 | 506 (4.8)              | 1                 | 1               |
| Yes                                    | 878   | 172 (19.8)             | 4.9( 3.8-6.2) *** | 3.2(2.5-4.1)*** |
| Total                                  | 12109 | 6.0 (95% CI: 5.5 -6.6) |                   |                 |

Definition of chronic kidney disease status: Urinary albumin to creatinine ratio of  $\geq 30$  mg/g and/or glomerular filtration rate  $< 60$  ml/min/1.73 m<sup>2</sup> both at baseline and follow up)

OR: odds ratio; CI: Confidence interval; COR: Crude odds ratio; AOR: Adjusted odds ratio. Adjusted OR estimated from the stepwise multivariate logistic regression model with all the above variables added except alcohol consumption.

<sup>1</sup> Reference group.

\* Indicated the corresponding variable had significant impact on the occurrence of CKD.

\*p value $\leq 0.05$  \*\*p value $\leq 0.01$ \*\*\*p value $\leq 0.0001$

# Missing value; refusal for blood sample collection led to variation in the sample size

204  
205



**207 Prevalence of CKD**

208 The overall prevalence of CKD based on the eGFR MDRD equation, (urinary albumin to  
209 creatinine ratio of  $\geq 30$  mg/g and/or glomerular filtration rate  $< 60$  both at baseline and follow up)  
210 was 6.0% (95% CI: 5.5-6.6). The prevalence was higher in males compared to female (6.5 vs 5.7)  
211 though not statistically significant. Prevalence increased with increasing age (11.5% among 60  
212 years and above and 2.6 % among 20-39 years age group). (Table 2). The mean ( $\pm$ SD) eGFR in  
213 baseline was 92.6 ( $\pm 22.1$ ) mL/min/1.73 m<sup>2</sup> for male and 88.2 ( $\pm 20.5$ ) mL/min/1.73 m<sup>2</sup> for female  
214 ( figure 2) .The mean ( $\pm$  SD) eGFR was 88.0 ( $\pm 25.7$ ) mL/min/1.73 m<sup>2</sup> for male and 81.1 ( $\pm 23.4$ )  
215 mL/min/1.73 m<sup>2</sup> for female in follow up (figure 3).

216

1  
2  
3 217  
4 218  
5  
6  
7

### 219 **Factors associated with CKD**

220 The multivariable analyses to investigate the association of independent factors and CKD are  
221 shown in Table 2. In the bivariate analysis, age, smoking, BMI, ethnicity, education, having  
222 diabetes mellitus (DM), being hypertensive, increased waist hip ratio, and having raised total  
223 cholesterol were found to be statistically significantly associated with CKD. Therefore, those 9  
224 factors including place of residence, province, and sex of participants (P-value  $\leq 0.25$ ) were  
225 considered in the multiple logistic models. After adjustment, only six variables: age, ethnicity,  
226 diabetes, hypertension, raised TC, and increased waist hip ratio, were found to be significant  
227 predictors of CKD. There was a strong positive association between age and CKD, i.e. the odds of  
228 having CKD were about 1.4 (95% CI : 1.0-1.8) and 2.6(95% CI: 1.9-3.6) times higher for people  
229 aged 40–59 years and  $\geq 60$  years respectively, compared with people aged 20-39 years. Participants  
230 with DM had about 3.2 (95% CI: 2.5-4.1) times higher odds of occurrence of CKD than non-  
231 diabetic participants. Similarly, participants with raised BP had 2.4 (95% CI: 2.0-3.0) higher odds  
232 of having CKD than non-hypertensive/normal participants.

233 Participants with raised total cholesterol had 1.3 (95% CI: 1.0-1.6) times higher odds of having  
234 CKD relative to participants who had normal cholesterol level, whereas those with raised waist  
235 hip ratio had 1.6(95% CI: 1.2-2.3) times higher odds than normal participants to have CKD.  
236 Individuals who were classified as Dalit by ethnicity were 1.6 (95% CI: 1.1-2.3) times or relatively  
237 advantaged janajati had 1.4 (95% CI: 1.0-1.9) times higher odds of having CKD when compared  
238 to individuals with an upper caste.

## 239 Discussion

240 This is the first large scale nationwide population based representative study to report prevalence  
241 of and factors associated with CKD in Nepal among population aged 20 years and above. In the  
242 absence of population validated e-GFR equation for our population, MDRD equation as done in  
243 previous studies was chosen over the CKD-EPI equation to facilitate comparison of results, CKD  
244 was prevalent among 6% of the population. The findings show that approximately one every  
245 sixteen adults in Nepal is affected by CKD. This value is higher than the population based study  
246 conducted in Morocco 5.1%<sup>18</sup> and Vietnam 3.1%<sup>19</sup>, almost similar to 6.8% in South Korea<sup>20</sup>,  
247 east African countries including Uganda and Kenya<sup>21</sup> but much lower than the prevalence of many  
248 Asian countries with 10.2% in china<sup>22</sup>, 17.5% in Thailand<sup>23</sup>, 18.9% in Iran<sup>24</sup> and 17.2% in India  
249<sup>25</sup>. Prevalence of CKD in Nepal is lower than the global burden of disease study estimated  
250 prevalence of 8%–10%<sup>3</sup> globally. However, these differences in the prevalence of CKD may be in  
251 part due to the differences in CKD diagnostic criteria, study design, laboratory methods and lack  
252 of validated measures for eGFR for Nepalese population.

253 Our multivariable analysis found that CKD was independently associated with age, hypertension,  
254 diabetes, raised TC, ethnicity and increased waist hip ratio ( $p < 0.05$  for each) which are all major  
255 NCDs risk factors and consistent with previous findings<sup>26–30</sup>. Age is a well-established risk factor  
256 for development of CKD<sup>31</sup>. As expected, age was found to be the most strongly associated risk  
257 factor in our study, we observed nearly three times higher odds of occurrence of CKD among  
258 people aged 60 years or older compared to people aged 20 to 39 years. Generally, as a part of the  
259 normal physiologic process, renal function (GFR) starts to decline even in a healthy individual by  
260 1 mL/min/1.73 m<sup>2</sup> per year after the age of 30 years<sup>32</sup>. A similar steep increase in CKD prevalence  
261 by age has also been reported by others<sup>33–35</sup>.

1  
2  
3 262 In line with other surveys in South East Asia, our findings show that the odds of CKD occurrence  
4  
5 263 was significantly and independently higher by around 2-fold with the presence of hypertension;  
6  
7 264 this supports previous reports<sup>32,36–38</sup> indicating the importance of early detection and treatment of  
8  
9 265 hypertension in Nepal. In our study people with diabetes mellitus had more than three times higher  
10  
11 266 odds of occurrence of CKD than people without diabetes. Almost one fifth of people with diabetes  
12  
13 267 had CKD as well. Supporting findings from our research, studies around the world indicate  
14  
15 268 diabetes is independently associated with development of CKD<sup>39,40</sup>. A survey across 10 Asian  
16  
17 269 countries showed that the most common cause of End Stage Renal Disease ( ESRD) in 9 out of 10  
18  
19 270 countries was diabetic nephropathy<sup>41</sup>. In addition; elevated total cholesterol was substantially  
20  
21 271 associated with higher odds for CKD. Given the double burden of disease and the early onset of  
22  
23 272 NCDs in the country – at age 40 people are already having CKD and other co-morbidities, as  
24  
25 273 shown in this manuscript, these findings have important medical and public-health implications,  
26  
27 274 in targeting these “high-risk” population subgroup of the population, to reduce progression and  
28  
29 275 delay the onset of cardiovascular complications and ESRD<sup>42</sup>.

30  
31 276 Nepal is an ethnically diverse country with more than 125 castes/ethnic groups. Interestingly  
32  
33 277 ethnicity/ caste was another factor contributing to CKD in our study. Compared with upper caste  
34  
35 278 participants, Dalit participants had a significantly higher prevalence of CKD. The mechanism  
36  
37 279 underlying these differences might be multifactorial, including cultural differences such as  
38  
39 280 smoking and drinking habit, lifestyle and genetic factors. By ethnicity, Dalit group of people are  
40  
41 281 considered as one of the most marginalized in terms of socioeconomic, education, political and  
42  
43 282 health indicators, resulting in decreased access to resources and higher vulnerability to poor  
44  
45 283 health outcomes. This calls for future studies regarding CKD on ethnic differences.  
46  
47  
48  
49  
50  
51  
52  
53

54  
55 284

1  
2  
3 285 Despite finding an association between CKD and several known established risk factors including  
4  
5 286 waist hip ratio, no association was found between CKD and BMI. The correlation between CKD  
6  
7  
8 287 and waist hip ratio and not BMI is plausible since this ratio is a more sensitive marker for central  
9  
10 288 obesity ,metabolic syndrome and potentially less influenced by muscle mass than BMI, this is in  
11  
12 289 agreement with earlier studies<sup>28,43,44</sup>. The association between smoking and CKD was reported in  
13  
14  
15 290 bivariate analysis only in our study.

16  
17  
18 291 In general, the prevalence of CKD was higher among women compared to men, and this difference  
19  
20 292 has been demonstrated in the past by several population based cross sectional studies.<sup>45</sup> However  
21  
22 293 in the present study, though not statistically significant, we found slightly higher prevalence of  
23  
24 294 CKD among male participants. These discrepancies in the prevalence may be due to the traditional  
25  
26  
27 295 risk factors such as hypertension and hyperglycemia being prevalent among male participant in  
28  
29 296 our study. We also could not find significant association between CKD and alcohol consumption,  
30  
31 297 place of residence, and provinces.

32  
33  
34  
35 298 Traditional risk factors such as diabetes and hypertension are the major cause of CKD in most  
36  
37 299 developed and developing countries<sup>46,47</sup>, and several other nontraditional and environmental risk  
38  
39 300 factors such as infectious diseases, analgesic abuse, exposure to heavy metal (Lead, Arsenic,  
40  
41 301 Mercury and Uranium), pesticides, herbal medications, and environmental pollution, impose an  
42  
43  
44 302 additionally threat worsening CKD especially in developing countries<sup>48</sup> including Nepal .  
45  
46 303 However, we lack information about environmental and some of the nontraditional risk factor,  
47  
48 304 which could be used to quantify the effects of these factors on CKD

49  
50  
51  
52 305 Our study poses several strengths. To the best of our knowledge, no national survey of CKD has  
53  
54 306 been done in the context of Nepal as per Kidney Disease Outcomes Quality Initiative (KDOQI)

1  
2  
3 307 clinical practice guideline; using (eGFR <60mL/min/1.73m<sup>2</sup>, presence of albuminuria ≥30mg/g  
4  
5 308 and chronicity confirmed by repeated testing after three months) to confirm presence of CKD. This  
6  
7 309 is the first study to report prevalence of CKD using a validated standardized estimation of the  
8  
9 310 glomerular filtration rate by the MDRD study equation which is carried out in a large  
10  
11 311 representative population-based sample of the adult population in Nepal following the strict  
12  
13 312 guideline and protocols, strict training processes and vigorous quality assurance programs were  
14  
15 313 used to ensure the quality of data collection. Additional strengths of the study include a high overall  
16  
17 314 response rate and analyses based on survey weights which ensure geographic representativeness  
18  
19 315 of the study. Thus, our findings would be generalizable to the general population. However, the  
20  
21 316 limitations of our analysis definitely deserve comment; potential limitations include dependency  
22  
23 317 on estimation of GFR, rather than direct measurement using injection of an exogenous marker  
24  
25 318 factors as well as cross-sectional design of the study which does not permit inferences regarding  
26  
27 319 causal relationships.  
28  
29  
30  
31  
32  
33

## 34 320 **Conclusions**

35  
36 321 This is the first population-based epidemiological survey of CKD using the protocols  
37  
38 322 recommended by KDOQI in Nepal. The prevalence of CKD was found to be 6.0%. The prevalence  
39  
40 323 of CKD was higher among male, participants with no formal education, urban residents, smokers  
41  
42 324 and participants with overweight and obese. CKD was independently associated with older age,  
43  
44 325 hypertension, diabetes mellitus, increased waist hip ratio, raised total cholesterol and individual  
45  
46 326 belonging to the Dalit caste by ethnicity. Our findings highlight the need for early preventive  
47  
48 327 measures to manage predisposing conditions such as diabetes and hypertension which could  
49  
50 328 ultimately lead to CKD and to reduce the prevalence and mortality arising from the associated  
51  
52 329 comorbidities in Nepal.  
53  
54  
55  
56  
57  
58  
59  
60

330

**331 Declarations**

332 **Acknowledgements:** The authors would like to thank all the individuals and organizations that  
333 provided technical support for the design and implementation of the main survey. The authors are  
334 grateful Dr. Shiva raj Mishra, Research Fellow in Epidemiology and Intervention Melbourne  
335 School of Population and Global Health, for reviewing the manuscript.

336 **Funding:** The authors have not received specific grant from any agency for this research.

337 **Competing interests:** The authors declare no conflict of interest.

338 **Data sharing statement:** The datasets used and/or analyzed will be made from the corresponding  
339 author on reasonable request

340 **Author's contributions:** KBK, KKA and MD conceived the study. LG and DKC helped in data  
341 entry and management. AP, BB and NS was involved in conducting data analysis. AP wrote the  
342 manuscript. AKJ supported in monitoring overall data quality. PG, VGL, UK, DAG and SKS  
343 revised and edited the manuscript. Each author provided intellectual content during manuscript  
344 drafting and revision, accepts accountability for their contributions.

345 **Ethics statement:** The study protocol was approved by the Ethical Review Board (ERB) of Nepal  
346 Health Research Council, Government of Nepal (Reg.no.110/2016). Written informed consent was  
347 taken from all participants before proceeding for data collection.

348 **Patient and public involvement:** Patients and/or the public were not involved in the design, or  
349 conduct, or reporting, or dissemination plans of this research.

350 **Patient consent for publication:** Not required.

351 **References**

- 352 1. Xie Y, Bowe B, Mokdad AH, et al. Analysis of the Global Burden of Disease study  
353 highlights the global, regional, and national trends of chronic kidney disease epidemiology  
354 from 1990 to 2016. *Kidney Int.* 2018;94(3):567-581.
- 355 2. Institute for Health Metrics and Evaluation (IHME). *GBD Compare Data.*; 2019.
- 356 3. Bikbov B, Purcell CA, Levey AS, et al. Global, regional, and national burden of chronic  
357 kidney disease, 1990--2017: a systematic analysis for the Global Burden of Disease Study  
358 2017. *Lancet.* 2020;395(10225):709-733.
- 359 4. Stanifer JW, Muiru A, Jafar TH, Patel UD. Chronic kidney disease in low-and middle-  
360 income countries. *Nephrol Dial Transplant.* 2016;31(6):868-874.
- 361 5. Nugent RA, Fathima SF, Feigl AB, Chyung D. The burden of chronic kidney disease on  
362 developing nations: a 21st century challenge in global health. *Nephron Clin Pract.*  
363 2011;118(3):c269--c277.
- 364 6. Agarwal SK, Dash SC, Irshad M, Raju S, Singh R, Pandey RM. Prevalence of chronic  
365 renal failure in adults in Delhi, India. *Nephrol Dial Transplant.* 2005;20(8):1638-1642.
- 366 7. Singh NP, Ingle GK, Saini VK, et al. Prevalence of low glomerular filtration rate,  
367 proteinuria and associated risk factors in North India using Cockcroft-Gault and  
368 Modification of Diet in Renal Disease equation: an observational, cross-sectional study.  
369 *BMC Nephrol.* 2009;10(1):1-13.
- 370 8. Jafar TH, Schmid CH, Levey AS. Serum creatinine as marker of kidney function in South  
371 Asians: a study of reduced GFR in adults in Pakistan. *J Am Soc Nephrol.*



- 1  
2  
3 372 2005;16(5):1413-1419.  
4  
5  
6 373 9. Sharma SK, Zou H, Togtokh A, et al. Burden of CKD, proteinuria, and cardiovascular risk  
7  
8 374 among Chinese, Mongolian, and Nepalese participants in the International Society of  
9  
10 375 Nephrology screening programs. *Am J kidney Dis.* 2010;56(5):915-927.  
11  
12  
13  
14 376 10. Ene-Iordache B, Perico N, Bikbov B, et al. Chronic kidney disease and cardiovascular risk  
15  
16 377 in six regions of the world (ISN-KDDC): a cross-sectional study. *Lancet Glob Heal.*  
17  
18 378 2016;4(5):e307--e319.  
19  
20  
21  
22 379 11. Sharma SK, Dhakal S, Thapa L, et al. Community-based screening for chronic kidney  
23  
24 380 disease, hypertension and diabetes in Dharan. Published online 2013.  
25  
26  
27 381 12. Dhimal M, Bista B, Bhattarai S, Dixit LP, Hyder MKA, Agrawal N, Rani M JA. *Non*  
28  
29 382 *Communicable Disease Risk Factors: STEPS Survey Nepal 2019.*  
30  
31  
32  
33 383 13. Nepal Health Research Council. *Population Based Prevalence of Selected Non-*  
34  
35 384 *Communicable Disease in Nepal.*; 2019. [http://nhrc.gov.np/publication/population-based-](http://nhrc.gov.np/publication/population-based-prevalence-of-selected-non-communicable-diseases-in-nepal/)  
36  
37 385 [prevalence-of-selected-non-communicable-diseases-in-nepal/](http://nhrc.gov.np/publication/population-based-prevalence-of-selected-non-communicable-diseases-in-nepal/)  
38  
39  
40  
41 386 14. Aryal KK, Neupane S, Mehata S, et al. Non communicable diseases risk factors: STEPS  
42  
43 387 Survey Nepal 2013 Kathmandu. *Nepal Nepal Heal Res Counc Sch.* Published online 2014.  
44  
45  
46 388 15. Chobanian A V, Bakris GL, Black HR, et al. Seventh report of the joint national  
47  
48 389 committee on prevention, detection, evaluation, and treatment of high blood pressure.  
49  
50 390 *Hypertension.* 2003;42(6):1206-1252.  
51  
52  
53  
54 391 16. Levey AS, Eckardt K-U, Tsukamoto Y, et al. Definition and classification of chronic  
55  
56 392 kidney disease: a position statement from Kidney Disease: Improving Global Outcomes  
57

- 1  
2  
3 393 (KDIGO). *Kidney Int.* 2005;67(6):2089-2100.  
4  
5  
6 394 17. STEP I. Non communicable diseases risk factors: steps survey Nepal. 2013.  
7  
8  
9 395 18. Gharbi MB, Elseviers M, Zamd M, et al. Chronic kidney disease, hypertension, diabetes,  
10  
11 396 and obesity in the adult population of Morocco: how to avoid “over”-and “under”-  
12  
13 397 diagnosis of CKD. *Kidney Int.* 2016;89(6):1363-1371.  
14  
15  
16  
17 398 19. Ito J, Dung DTK, Vuong MT, et al. Impact and perspective on chronic kidney disease in  
18  
19 399 an Asian developing country: a large-scale survey in North Vietnam. *Nephron Clin Pract.*  
20  
21 400 2008;109(1):c25--c32.  
22  
23  
24  
25 401 20. Jang SY, Kim I-H, Ju EY, Ahn SJ, Kim D-K, Lee SW. Chronic kidney disease and  
26  
27 402 metabolic syndrome in a general Korean population: the Third Korea National Health and  
28  
29 403 Nutrition Examination Survey (KNHANES III) Study. *J Public Health (Bangkok).*  
30  
31 404 2010;32(4):538-546.  
32  
33  
34  
35 405 21. Muiro AN, Charlebois ED, Balzer LB, et al. The epidemiology of chronic kidney disease  
36  
37 406 (CKD) in rural East Africa: a population-based study. *PLoS One.* 2020;15(3):e0229649.  
38  
39  
40 407 22. Zhang L, Wang F, Wang L, et al. Prevalence of chronic kidney disease in China: a cross-  
41  
42 408 sectional survey. *Lancet.* 2012;379(9818):815-822.  
43  
44  
45  
46 409 23. Ingsathit A, Thakkinstian A, Chairprasert A, et al. Prevalence and risk factors of chronic  
47  
48 410 kidney disease in the Thai adult population: Thai SEEK study. *Nephrol Dial Transplant.*  
49  
50 411 2010;25(5):1567-1575.  
51  
52  
53  
54 412 24. Hosseinpanah F, Kasraei F, Nassiri AA, Azizi F. High prevalence of chronic kidney  
55  
56 413 disease in Iran: a large population-based study. *BMC Public Health.* 2009;9(1):1-8.  
57  
58  
59  
60

- 1  
2  
3 414 25. Singh AK, Farag YMK, Mittal B V, et al. Epidemiology and risk factors of chronic kidney  
4  
5 415 disease in India--results from the SEEK (Screening and Early Evaluation of Kidney  
6  
7 416 Disease) study. *BMC Nephrol.* 2013;14(1):1-10.  
8  
9  
10  
11 417 26. Hannan M, Ansari S, Meza N, et al. Risk factors for CKD progression: overview of  
12  
13 418 findings from the CRIC study. *Clin J Am Soc Nephrol.* 2021;16(4):648-659.  
14  
15  
16 419 27. Tsuruya K, Yoshida H, Nagata M, et al. Association of the triglycerides to high-density  
17  
18 420 lipoprotein cholesterol ratio with the risk of chronic kidney disease: analysis in a large  
19  
20 421 Japanese population. *Atherosclerosis.* 2014;233(1):260-267.  
21  
22  
23  
24 422 28. He Y, Li F, Wang F, Ma X, Zhao X, Zeng Q. The association of chronic kidney disease  
25  
26 423 and waist circumference and waist-to-height ratio in Chinese urban adults. *Medicine*  
27  
28 424 *(Baltimore).* 2016;95(25).  
29  
30  
31  
32 425 29. Alkerwi A, Sauvageot N, El Bahi I, et al. Prevalence and related risk factors of chronic  
33  
34 426 kidney disease among adults in Luxembourg: evidence from the observation of  
35  
36 427 cardiovascular risk factors (ORISCAV-LUX) study. *BMC Nephrol.* 2017;18(1):1-10.  
37  
38  
39  
40 428 30. Ping H, Zhang X, Xing N. Prevalence of chronic kidney disease in China. *Lancet.*  
41  
42 429 2012;380(9838):216.  
43  
44  
45 430 31. O'Hare AM, Choi AI, Bertenthal D, et al. Age affects outcomes in chronic kidney disease.  
46  
47 431 *J Am Soc Nephrol.* 2007;18(10):2758-2765.  
48  
49  
50  
51 432 32. Price CP, Finney H. Developments in the assessment of glomerular filtration rate. *Clin*  
52  
53 433 *Chim acta.* 2000;297(1-2):55-66.  
54  
55  
56 434 33. Garg AX, Papaioannou A, Ferko N, Campbell G, Clarke J-A, Ray JG. Estimating the  
57

- 1  
2  
3 435 prevalence of renal insufficiency in seniors requiring long-term care. *Kidney Int.*  
4  
5 436 2004;65(2):649-653.  
6  
7  
8  
9 437 34. Wasen E, Isoaho R, Mattila K, Vahlberg T, Kivelä S-L, Irjala K. Estimation of glomerular  
10  
11 438 filtration rate in the elderly: a comparison of creatinine-based formulae with serum  
12  
13 439 cystatin C. *J Intern Med.* 2004;256(1):70-78.  
14  
15  
16 440 35. Hemmelgarn BR, Zhang J, Manns BJ, et al. Progression of kidney dysfunction in the  
17  
18 441 community-dwelling elderly. *Kidney Int.* 2006;69(12):2155-2161.  
19  
20  
21 442 36. Li Z-Y, Xu G-B, Xia T-A, Wang H-Y. Prevalence of chronic kidney disease in a middle  
22  
23 443 and old-aged population of Beijing. *Clin Chim acta.* 2006;366(1-2):209-215.  
24  
25  
26  
27 444 37. Safarinejad MR, others. The epidemiology of adult chronic kidney disease in a  
28  
29 445 population-based study in Iran: prevalence and associated risk factors. *JN J Nephrol.*  
30  
31 446 2009;22(1):99.  
32  
33  
34  
35 447 38. Fiseha T, Kassim M, Yemane T. Prevalence of chronic kidney disease and associated risk  
36  
37 448 factors among diabetic patients in southern Ethiopia. *Am J Heal Res.* 2014;2(4):216-221.  
38  
39  
40 449 39. Damtie S, Biadgo B, Baynes HW, et al. Chronic kidney disease and associated risk factors  
41  
42 450 assessment among diabetes mellitus patients at a tertiary hospital, Northwest Ethiopia.  
43  
44 451 *Ethiop J Health Sci.* 2018;28(6).  
45  
46  
47  
48 452 40. Duan J, Wang C, Liu D, et al. Prevalence and risk factors of chronic kidney disease and  
49  
50 453 diabetic kidney disease in Chinese rural residents: a cross-sectional survey. *Sci Rep.*  
51  
52 454 2019;9(1):1-11.  
53  
54  
55  
56 455 41. Lee G. End-stage renal disease in the Asian-Pacific region. In: *Seminars in*  
57

- 1  
2  
3 456 *Nephrologyjournal*. Vol 23. ; 2003:107-114.  
4  
5  
6 457 42. Hallan SI, Dahl K, Oien CM, et al. Screening strategies for chronic kidney disease in the  
7  
8  
9 458 general population: follow-up of cross sectional health survey. *Bmj*. 2006;333(7577):1047.  
10  
11  
12 459 43. Elsayed EF, Tighiouart H, Weiner DE, et al. Waist-to-hip ratio and body mass index as  
13  
14 460 risk factors for cardiovascular events in CKD. *Am J Kidney Dis*. 2008;52(1):49-57.  
15  
16  
17 461 44. Silva MIB, da Silva Lemos CC, Torres MRSG, Bregman R. Waist-to-height ratio: an  
18  
19 462 accurate anthropometric index of abdominal adiposity and a predictor of high HOMA-IR  
20  
21 463 values in nondialyzed chronic kidney disease patients. *Nutrition*. 2014;30(3):279-285.  
22  
23  
24  
25 464 45. Bikbov B, Perico N, Remuzzi G. on behalf of the GBD Genitourinary Diseases Expert  
26  
27 465 Group. Disparities in chronic kidney disease prevalence among males and females in 195  
28  
29 466 countries: analysis of the Global Burden of Disease 2016 study. *Nephron*.  
30  
31 467 2018;139(4):313-318.  
32  
33  
34  
35 468 46. Koye DN, Shaw JE, Reid CM, Atkins RC, Reutens AT, Magliano DJ. Incidence of  
36  
37 469 chronic kidney disease among people with diabetes: a systematic review of observational  
38  
39 470 studies. *Diabet Med*. 2017;34(7):887-901.  
40  
41  
42  
43 471 47. Garofalo C, Borrelli S, Pacilio M, et al. Hypertension and Prehypertension and Prediction  
44  
45 472 of Development of Decreased Estimated GFR in the General Population: A Meta-analysis  
46  
47 473 of Cohort Studies. *Am J Kidney Dis*. 2016;67(1):89-97. doi:10.1053/j.ajkd.2015.08.027  
48  
49  
50 474 48. Xu X, Nie S, Ding H, Hou FF. Environmental pollution and kidney diseases. *Nat Rev*  
51  
52 475 *Nephrol*. 2018;14(5):313-324.  
53  
54  
55  
56 476

1  
2  
3 **477 Figure legend**  
4  
5

6 **478 Figure 1: Map of Nepal showing the study clusters (400 clusters)**  
7  
8

9 **479 Figure 2: Histogram of estimated glomerular filtration rate (eGFR) distribution among**  
10  
11 **480 12097 participants in baseline by sex**  
12  
13

14 **481 Figure 3: Histogram of estimated glomerular filtration rate (eGFR) distribution among 1194**  
15  
16 **482 participants in follow up by sex**  
17  
18

19  
20 483  
21  
22

23 484  
24  
25

26  
27 485  
28  
29

30 486  
31  
32

33 487  
34  
35

36 488  
37  
38

39 489  
40  
41

42 490  
43  
44

45 491  
46  
47

48 492  
49  
50

51 493  
52  
53

54  
55 494  
56  
57

1  
2  
3 495  
4  
5  
6 496  
7  
8  
9 497  
10  
11  
12  
13  
14  
15  
16  
17  
18  
19  
20  
21  
22  
23  
24  
25  
26  
27  
28  
29  
30  
31  
32  
33  
34  
35  
36  
37  
38  
39  
40  
41  
42  
43  
44  
45  
46  
47  
48  
49  
50  
51  
52  
53  
54  
55  
56  
57  
58  
59  
60

For peer review only

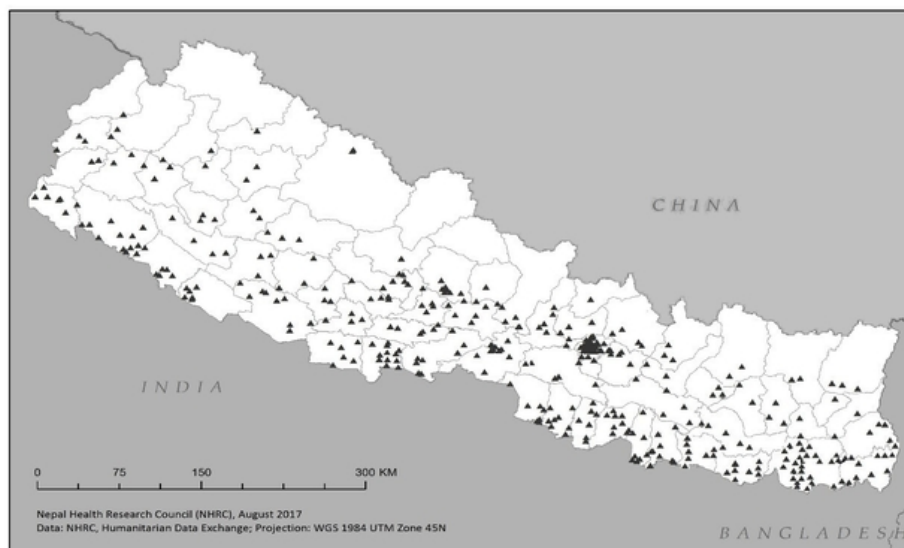

Figure 1: Map of Nepal showing the study clusters (400 clusters)

56x38mm (300 x 300 DPI)



1  
2  
3  
4  
5  
6  
7  
8  
9  
10  
11  
12  
13  
14  
15  
16  
17  
18  
19  
20  
21  
22  
23  
24  
25  
26  
27  
28  
29  
30  
31  
32  
33  
34  
35  
36  
37  
38  
39  
40  
41  
42  
43  
44  
45  
46  
47  
48  
49  
50  
51  
52  
53  
54  
55  
56  
57  
58  
59  
60

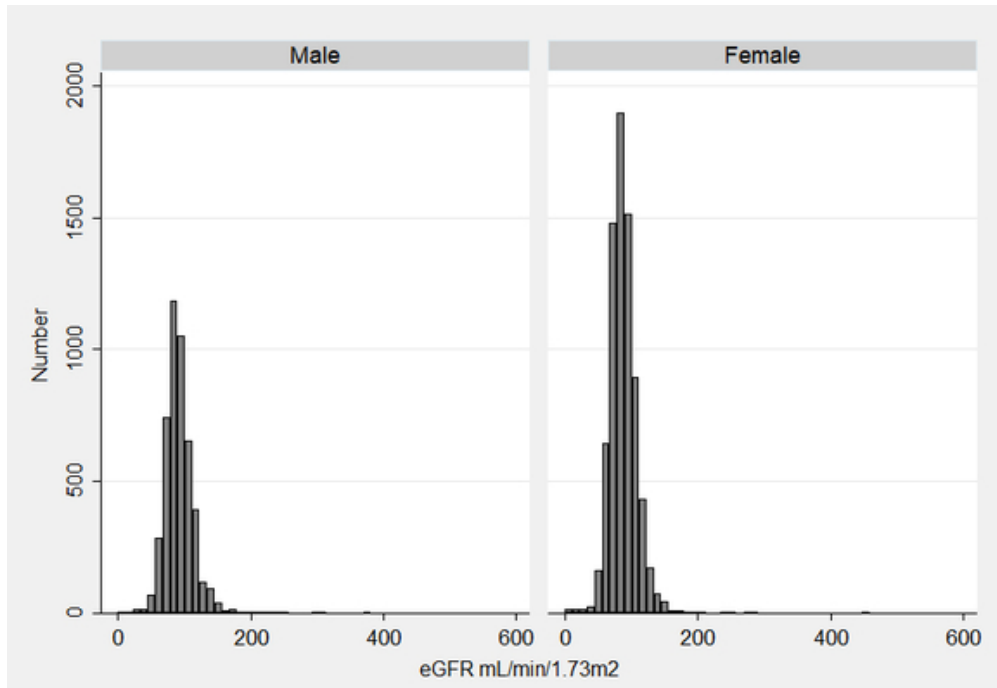

Figure 2: Histogram of estimated glomerular filtration rate (eGFR) distribution among 12097 participants in the baseline by sex

24x16mm (600 x 600 DPI)

1  
2  
3  
4  
5  
6  
7  
8  
9  
10  
11  
12  
13  
14  
15  
16  
17  
18  
19  
20  
21  
22  
23  
24  
25  
26  
27  
28  
29  
30  
31  
32  
33  
34  
35  
36  
37  
38  
39  
40  
41  
42  
43  
44  
45  
46  
47  
48  
49  
50  
51  
52  
53  
54  
55  
56  
57  
58  
59  
60

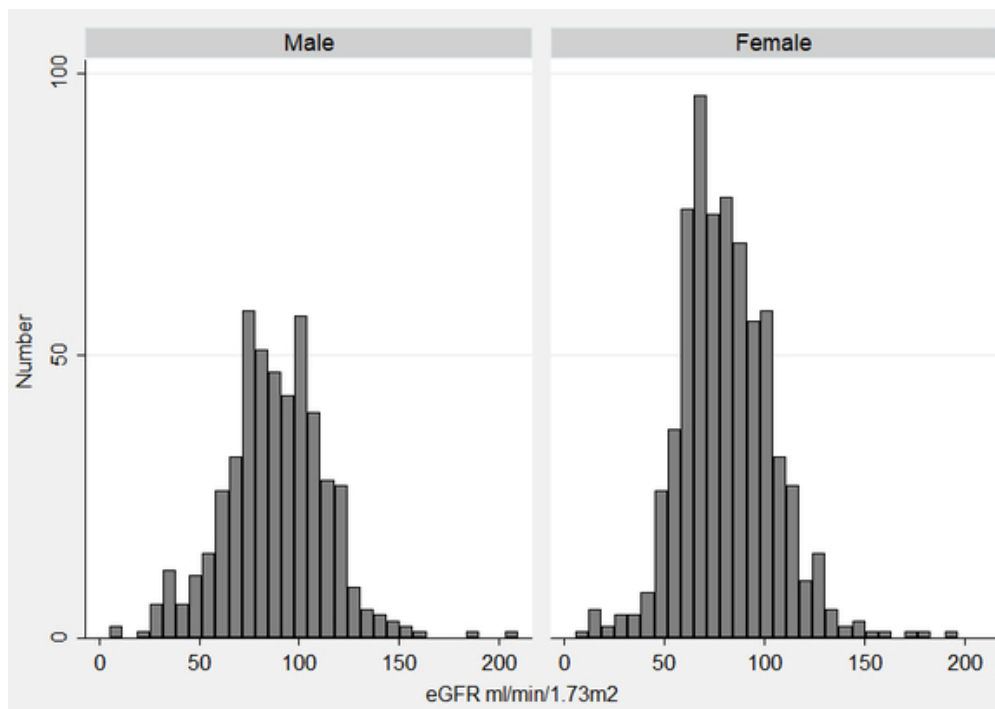

Figure 3: Histogram of estimated glomerular filtration rate (eGFR) distribution among 1194 participants in follow up by sex

24x17mm (600 x 600 DPI)

1  
2  
3  
4  
5  
6  
7  
8  
9  
10  
11  
12  
13  
14  
15  
16  
17  
18  
19  
20  
21  
22  
23  
24  
25  
26  
27  
28  
29  
30  
31  
32  
33  
34  
35  
36  
37  
38  
39  
40  
41  
42  
43  
44  
45  
46  
47  
48  
49  
50  
51  
52  
53  
54  
55  
56  
57  
58  
59  
60STROBE Statement—Checklist of items that should be included in reports of *cross-sectional studies*

|                              | Item No | Recommendation                                                                                                                                                                                    | Page No |
|------------------------------|---------|---------------------------------------------------------------------------------------------------------------------------------------------------------------------------------------------------|---------|
| <b>Title and abstract</b>    | 1       | (a) Indicate the study's design with a commonly used term in the title or the abstract                                                                                                            | 2       |
|                              |         | (b) Provide in the abstract an informative and balanced summary of what was done and what was found                                                                                               | 2-3     |
| <b>Introduction</b>          |         |                                                                                                                                                                                                   |         |
| Background/rationale         | 2       | Explain the scientific background and rationale for the investigation being reported                                                                                                              | 4-5     |
| Objectives                   | 3       | State specific objectives, including any prespecified hypotheses                                                                                                                                  | 5       |
| <b>Methods</b>               |         |                                                                                                                                                                                                   |         |
| Study design                 | 4       | Present key elements of study design early in the paper                                                                                                                                           | 5-6     |
| Setting                      | 5       | Describe the setting, locations, and relevant dates, including periods of recruitment, exposure, follow-up, and data collection                                                                   | 5-7     |
| Participants                 | 6       | (a) Give the eligibility criteria, and the sources and methods of selection of participants                                                                                                       | 5-6     |
| Variables                    | 7       | Clearly define all outcomes, exposures, predictors, potential confounders, and effect modifiers. Give diagnostic criteria, if applicable                                                          | 8       |
| Data sources/<br>measurement | 8*      | For each variable of interest, give sources of data and details of methods of assessment (measurement). Describe comparability of assessment methods if there is more than one group              | 8-9     |
| Bias                         | 9       | Describe any efforts to address potential sources of bias                                                                                                                                         | 8-9     |
| Study size                   | 10      | Explain how the study size was arrived at                                                                                                                                                         | 5-6     |
| Quantitative variables       | 11      | Explain how quantitative variables were handled in the analyses. If applicable, describe which groupings were chosen and why                                                                      | 8-9     |
| Statistical methods          | 12      | (a) Describe all statistical methods, including those used to control for confounding                                                                                                             | 8-9     |
|                              |         | (b) Describe any methods used to examine subgroups and interactions                                                                                                                               | 8-9     |
|                              |         | (c) Explain how missing data were addressed                                                                                                                                                       | 10      |
|                              |         | (d) If applicable, describe analytical methods taking account of sampling strategy                                                                                                                | 5       |
|                              |         | (e) Describe any sensitivity analyses                                                                                                                                                             | na      |
| <b>Results</b>               |         |                                                                                                                                                                                                   |         |
| Participants                 | 13*     | (a) Report numbers of individuals at each stage of study—eg numbers potentially eligible, examined for eligibility, confirmed eligible, included in the study, completing follow-up, and analysed | 5-6     |
|                              |         | (b) Give reasons for non-participation at each stage                                                                                                                                              | 5-7     |
|                              |         | (c) Consider use of a flow diagram                                                                                                                                                                | na      |
| Descriptive data             | 14*     | (a) Give characteristics of study participants (eg demographic, clinical, social) and information on exposures and potential confounders                                                          | 10-17   |
|                              |         | (b) Indicate number of participants with missing data for each variable of interest                                                                                                               | 10-17   |
| Outcome data                 | 15*     | Report numbers of outcome events or summary measures                                                                                                                                              | 10-17   |
| Main results                 | 16      | (a) Give unadjusted estimates and, if applicable, confounder-adjusted estimates and their precision (eg, 95% confidence interval). Make clear                                                     | 10-17   |

|                          |    |                                                                                                                                                                            |       |
|--------------------------|----|----------------------------------------------------------------------------------------------------------------------------------------------------------------------------|-------|
|                          |    | which confounders were adjusted for and why they were included                                                                                                             |       |
|                          |    | (b) Report category boundaries when continuous variables were categorized                                                                                                  | 10-17 |
|                          |    | (c) If relevant, consider translating estimates of relative risk into absolute risk for a meaningful time period                                                           | na    |
| Other analyses           | 17 | Report other analyses done—eg analyses of subgroups and interactions, and sensitivity analyses                                                                             | 10-17 |
| <b>Discussion</b>        |    |                                                                                                                                                                            |       |
| Key results              | 18 | Summarise key results with reference to study objectives                                                                                                                   | 17    |
| Limitations              | 19 | Discuss limitations of the study, taking into account sources of potential bias or imprecision. Discuss both direction and magnitude of any potential bias                 | 21    |
| Interpretation           | 20 | Give a cautious overall interpretation of results considering objectives, limitations, multiplicity of analyses, results from similar studies, and other relevant evidence | 17-21 |
| Generalisability         | 21 | Discuss the generalisability (external validity) of the study results                                                                                                      | 21    |
| <b>Other information</b> |    |                                                                                                                                                                            |       |
| Funding                  | 22 | Give the source of funding and the role of the funders for the present study and, if applicable, for the original study on which the present article is based              | 22    |

\*Give information separately for exposed and unexposed groups.

**Note:** An Explanation and Elaboration article discusses each checklist item and gives methodological background and published examples of transparent reporting. The STROBE checklist is best used in conjunction with this article (freely available on the Web sites of PLoS Medicine at <http://www.plosmedicine.org/>, Annals of Internal Medicine at <http://www.annals.org/>, and Epidemiology at <http://www.epidem.com/>). Information on the STROBE Initiative is available at [www.strobe-statement.org](http://www.strobe-statement.org).

# BMJ Open

## Prevalence and Risk Factors Associated with Chronic Kidney Disease in Nepal: Evidence from a Nationally Representative Population-Based cross-sectional Study

|                                 |                                                                                                                                                                                                                                                                                                                                                                                                                                                                                                                                                                                                                                                                                                                                                                                                                                                                                                                                                                                                                                                                                                                                                                                                                                                                                                                                                                                                                                                                      |
|---------------------------------|----------------------------------------------------------------------------------------------------------------------------------------------------------------------------------------------------------------------------------------------------------------------------------------------------------------------------------------------------------------------------------------------------------------------------------------------------------------------------------------------------------------------------------------------------------------------------------------------------------------------------------------------------------------------------------------------------------------------------------------------------------------------------------------------------------------------------------------------------------------------------------------------------------------------------------------------------------------------------------------------------------------------------------------------------------------------------------------------------------------------------------------------------------------------------------------------------------------------------------------------------------------------------------------------------------------------------------------------------------------------------------------------------------------------------------------------------------------------|
| Journal:                        | <i>BMJ Open</i>                                                                                                                                                                                                                                                                                                                                                                                                                                                                                                                                                                                                                                                                                                                                                                                                                                                                                                                                                                                                                                                                                                                                                                                                                                                                                                                                                                                                                                                      |
| Manuscript ID                   | bmjopen-2021-057509.R2                                                                                                                                                                                                                                                                                                                                                                                                                                                                                                                                                                                                                                                                                                                                                                                                                                                                                                                                                                                                                                                                                                                                                                                                                                                                                                                                                                                                                                               |
| Article Type:                   | Original research                                                                                                                                                                                                                                                                                                                                                                                                                                                                                                                                                                                                                                                                                                                                                                                                                                                                                                                                                                                                                                                                                                                                                                                                                                                                                                                                                                                                                                                    |
| Date Submitted by the Author:   | 24-Jan-2022                                                                                                                                                                                                                                                                                                                                                                                                                                                                                                                                                                                                                                                                                                                                                                                                                                                                                                                                                                                                                                                                                                                                                                                                                                                                                                                                                                                                                                                          |
| Complete List of Authors:       | <p>Poudyal, Anil; Nepal Health Research Council<br/> Karki, Khem; Goethe University Frankfurt Institute of Occupational Social and Environmental Medicine; Department of Community Medicine, Maharajgunj Medical Campus, Kathmandu, Nepal<br/> Shrestha, Namuna; Public Health Promotion and Development Organization;<br/> Aryal, KK; MOMENTUM Country and Global Leadership, Save the Children Nepal, Kathmandu, Nepal, Research Section<br/> Mahato, Namra ; Nepal Health Research Council<br/> Bista, Bihungum; Nepal Health Research Council, Research<br/> Ghimire, Laxmi; Sanjeevani College of Medical Sciences<br/> K.C., Dirghayu; Public Health Promotion and Development Organization. Kathmandu, Nepal, Research<br/> Gyanwali, Pradip ; Nepal Health Research Council<br/> Jha, Anjani; Nepal Health Research Council<br/> Garcia Larsen, Vanessa; Johns Hopkins University Bloomberg School of Public Health, International Health<br/> Kuch, Ulrich; Goethe University Frankfurt Institute of Occupational Social and Environmental Medicine, Social and Environmental Medicine<br/> Groneberg, David; Goethe University Frankfurt Institute of Occupational Social and Environmental Medicine<br/> Sharma, Sanjib Kumar; BP Koirala Institute of Health Sciences, Department of Internal Medicine<br/> Dhimal, Meghnath; Nepal Health Research Council; Goethe University Frankfurt Institute of Occupational Social and Environmental Medicine</p> |
| <b>Primary Subject Heading</b>: | Renal medicine                                                                                                                                                                                                                                                                                                                                                                                                                                                                                                                                                                                                                                                                                                                                                                                                                                                                                                                                                                                                                                                                                                                                                                                                                                                                                                                                                                                                                                                       |
| Secondary Subject Heading:      | Urology                                                                                                                                                                                                                                                                                                                                                                                                                                                                                                                                                                                                                                                                                                                                                                                                                                                                                                                                                                                                                                                                                                                                                                                                                                                                                                                                                                                                                                                              |
| Keywords:                       | Chronic renal failure < NEPHROLOGY, Dialysis < NEPHROLOGY, Glomerulonephritis < NEPHROLOGY, Renal transplantation < NEPHROLOGY                                                                                                                                                                                                                                                                                                                                                                                                                                                                                                                                                                                                                                                                                                                                                                                                                                                                                                                                                                                                                                                                                                                                                                                                                                                                                                                                       |
|                                 |                                                                                                                                                                                                                                                                                                                                                                                                                                                                                                                                                                                                                                                                                                                                                                                                                                                                                                                                                                                                                                                                                                                                                                                                                                                                                                                                                                                                                                                                      |

1  
2  
3  
4  
5  
6  
7  
8  
9  
10  
11  
12  
13  
14  
15  
16  
17  
18  
19  
20  
21  
22  
23  
24  
25  
26  
27  
28  
29  
30  
31  
32  
33  
34  
35  
36  
37  
38  
39  
40  
41  
42  
43  
44  
45  
46  
47  
48  
49  
50  
51  
52  
53  
54  
55  
56  
57  
58  
59  
60





I, the Submitting Author has the right to grant and does grant on behalf of all authors of the Work (as defined in the below author licence), an exclusive licence and/or a non-exclusive licence for contributions from authors who are: i) UK Crown employees; ii) where BMJ has agreed a CC-BY licence shall apply, and/or iii) in accordance with the terms applicable for US Federal Government officers or employees acting as part of their official duties; on a worldwide, perpetual, irrevocable, royalty-free basis to BMJ Publishing Group Ltd ("BMJ") its licensees and where the relevant Journal is co-owned by BMJ to the co-owners of the Journal, to publish the Work in this journal and any other BMJ products and to exploit all rights, as set out in our [licence](#).

The Submitting Author accepts and understands that any supply made under these terms is made by BMJ to the Submitting Author unless you are acting as an employee on behalf of your employer or a postgraduate student of an affiliated institution which is paying any applicable article publishing charge ("APC") for Open Access articles. Where the Submitting Author wishes to make the Work available on an Open Access basis (and intends to pay the relevant APC), the terms of reuse of such Open Access shall be governed by a Creative Commons licence – details of these licences and which [Creative Commons](#) licence will apply to this Work are set out in our licence referred to above.

Other than as permitted in any relevant BMJ Author's Self Archiving Policies, I confirm this Work has not been accepted for publication elsewhere, is not being considered for publication elsewhere and does not duplicate material already published. I confirm all authors consent to publication of this Work and authorise the granting of this licence.

1  
2  
3  
4 1 **Prevalence and Risk Factors Associated with Chronic Kidney Disease in Nepal: Evidence**  
5  
6 2 **from a Nationally Representative Population Based Cross sectional Study**  
7

8  
9 3 Anil Poudyal<sup>1\*#</sup>, Khem Bahadur Karki<sup>1,2,3#</sup>, Namuna Shrestha<sup>4</sup>, Krishna Kumar Aryal<sup>5</sup>, Namra  
10  
11 4 Kumar Mahato<sup>1</sup>, Bihungum Bista<sup>1</sup>, Laxmi Ghimire<sup>6</sup>, Dirghayu KC<sup>4</sup>, Pradip Gyanwali<sup>1</sup>, Anjani  
12  
13 5 Kumar Jha<sup>1</sup>, Vanessa Garcia-Larsen<sup>7</sup>, Ulrich Kuch<sup>3</sup>, David A, Groneberg<sup>3</sup>, Sanjib Kumar  
14  
15 6 Sharma<sup>8</sup>, Meghnath Dhimal<sup>1,3\*</sup>  
16  
17

18  
19 7 **# Equal contributors**  
20  
21

22 8 <sup>1</sup> Nepal Health Research Council (NHRC), Ramshah Path, Kathmandu, Nepal  
23  
24

25 9 <sup>2</sup> Department of Community Medicine, Maharajgunj Medical Campus, Kathmandu, Nepal  
26  
27

28 10 <sup>3</sup> Institute of Occupational, Social and Environmental Medicine, Goethe University, Frankfurt am  
29  
30 11 Main, Germany  
31  
32

33  
34 12 <sup>4</sup> Public Health Promotion and Development Organization. Kathmandu, Nepal  
35  
36

37 13 <sup>5</sup> MOMENTUM Country and Global Leadership, Save the Children Nepal, Kathmandu, Nepal  
38  
39

40 14 <sup>6</sup> Sanjeevani College of Medical Sciences, Rupandehi, Nepal  
41  
42

43 15 <sup>7</sup> Department of International Health, The Johns Hopkins Bloomberg School of Public Health,  
44  
45 16 Baltimore, Maryland, USA  
46  
47

48 17 <sup>8</sup> Department of Internal Medicine, BP Koirala Institute of Health Sciences, Dharan, Nepal  
49  
50

51  
52 18 **\*Corresponding Author:** Anil poudyal( Email: [poudyalanil123@gmail.com](mailto:poudyalanil123@gmail.com))  
53  
54

55 19  
56  
57



## 20 Abstract

21 **Objective:** This study aimed to determine population based prevalence of Chronic Kidney  
22 Disease (CKD) and its associated factors in Nepal.

23 **Study Design:** The study was a nationwide population-based cross sectional study

24 **Setting & Participants:** Cross-sectional survey conducted in a nationally representative sample  
25 of 12109 Nepalese adult from 2016 to 2018 on selected chronic non-communicable diseases  
26 were examined. Multistage cluster sampling with a mix of probability proportionate to size (PPS)  
27 and systematic random sampling was used for the selection of individuals aged 20 years and  
28 above. **Primary and secondary outcome measures:** Primary outcome in this study was  
29 population based prevalence of CKD in Nepal. A participant was considered to have CKD if the  
30 Urine Albumin-to-Creatinine Ratio (uACR) was greater than or equal to 30 mg/g and/or  
31 estimated Glomerular Filtration Rate (e-GFR) is less than 60 mL/min/1.73 m<sup>2</sup> at baseline and in  
32 follow up using modification of diet in renal disease study (MDRD) equations. The secondary  
33 outcome measure was factors associated with CKD in Nepal. The co-variate adjusted association  
34 of risk factors and CKD was calculated using multivariable binary logistic regression.

35 **Results:** The overall prevalence of CKD in Nepal was 6.0% (95% CI: 5.5-6.6). Factors  
36 independently associated with CKD included older age, (adjusted OR (AOR) 2.6, 95% CI: 1.9 to  
37 3.6), Dalit caste (AOR 1.6, 95% CI: 1.1 to 2.3), hypertension, (AOR 2.4, 95% CI: 2.0 to 3.0)  
38 diabetes mellitus (AOR 3.2, 95% CI: 2.5 to 4.1), raised total cholesterol (AOR 1.3, 95% CI: 1.0  
39 to 1.6) and increased waist-to-hip ratio (AOR 1.6, 95% CI: 1.2 to 2.3).

40 **Conclusion:** This nationally representative study shows that the prevalence of CKD in the adult  
41 population of Nepal is substantial, and it is independently associated with several

1  
2  
3 42 cardiometabolic traits. These findings warrant longitudinal studies to identify the causes of CKD  
4  
5 43 in Nepal and effective strategies to prevent it.  
6  
7

8  
9 44 **Keywords:** Chronic Kidney Disease, Nepal, adults, prevalence, eGFR, serum creatinine  
10

#### 11 **Strengths and limitations of this study**

12

- 13 • This is the first large scale nationwide population-based prevalence of CKD in Nepal.
  - 14 • Strict training processes and vigorous quality assurance programs were used to ensure the  
15 quality of data collection
  - 16 • The use of standardized definitions of CKD facilitates international comparisons of CKD  
17 prevalence and risk factors.
  - 18 • High overall response rate of 91.7. % in first visit and 86.9% in follow up visit.
  - 19 • Causal inference is unknown
- 20  
21  
22  
23  
24  
25  
26  
27  
28  
29  
30  
31  
32  
33  
34

35 45  
36  
37  
38  
39  
40  
41  
42  
43  
44  
45  
46  
47  
48  
49  
50  
51  
52  
53  
54  
55  
56  
57  
58  
59  
60

## 46 **Background**

47 Chronic Kidney Disease (CKD) is one of the most rapidly growing non-communicable diseases  
48 (NCDs) worldwide <sup>1</sup>. According to the Global Burden of Disease (GBD) study, CKD was the  
49 11<sup>th</sup> leading cause of death in 2019, up from 19<sup>th</sup> in 1990 accounting for 2.53% of total deaths<sup>2</sup>.  
50 CKD is also associated with substantial morbidity, mortality, and healthcare costs. Although it is  
51 largely preventable, over 9% of the population worldwide is estimated to be affected by the  
52 condition, particularly developing countries <sup>3,4</sup>, and it is associated with diabetes type II,  
53 hypertension and obesity, which are also growing at an alarming rate. The rapid increase of  
54 CKD is likely to impose a great socioeconomic and public health burden in in resource-poor  
55 setting<sup>5</sup>.

56 The evidence on the prevalence of CKD in South East Asia is relatively limited, but it  
57 consistently shows a high prevalence of CKD<sup>6-8</sup>, however data remain poorly characterized due  
58 to inconsistent assessment of kidney function and nonstandard approaches which might distort  
59 the true estimates of CKD prevalence. There are few studies in Nepal already warned the higher  
60 prevalence of CKD<sup>9-11</sup> and reported data largely depends on the population studied (rural/  
61 urban/or general/at high risk group) methods and the lack of representativeness from the  
62 general population. Nepal has overcome many of the critical health challenges to survive the  
63 first five years of life, and that NCDs and burden of potential underlying risk factors such as  
64 obesity, hypertension, and diabetes and unhealthy lifestyle habits including poor diets are highly  
65 prevalent<sup>12</sup>.

66 Understanding the burden and risk factors associated with CKD is important for making health  
67 care planning, designing screening strategies, and prevention of these diseases in this resource

1  
2  
3 68 constrains setting, where access to renal replacement therapy is costly. Therefore, this study  
4  
5 69 aimed to determine the population based prevalence of CKD and its associated factors in Nepal.  
6  
7

## 8 9 **Methods**

### 10 11 **Study design and subjects**

12  
13 72 The Nepal Health Research Council designed and implemented the “National Population based  
14  
15 73 Prevalence Survey of Selected NCDs in Nepal”. This was a population-based survey to  
16  
17 74 investigate the prevalence of NCDs including CKD, chronic obstructive pulmonary disease  
18  
19 75 carried out between 2016 and 2018 in adult's  $\geq 20$  years old from seven provinces of the country.  
20  
21 76 Full details of the design and protocols of the survey are available elsewhere<sup>13</sup>.  
22  
23  
24  
25

### 26 27 **Participants, sample size, and study setting**

28  
29 78 The sample size for the survey was calculated taking as reference the prevalence of raised blood  
30  
31 79 glucose ( $p=4\%$ ) from NCD risk factors: STEPwise approach to Surveillance(STEPS) survey  
32  
33 80 2013<sup>14</sup>, Z value of 1.96 at 95% confidence level and margin of error (d) of 20%, design effect of  
34  
35 81 2, adjusting the sample across three domains of the Terai, hills and mountains and adding a non-  
36  
37 82 response rate of 20% yielded a sample size of 12,965. With a plan to enroll 33 participants in  
38  
39 83 each cluster (400), the final sample size was 13,200. A ward (lowest administrative unit of the -  
40  
41 84 then Village Development Committees (VDCs) and Municipalities) was considered as a cluster-  
42  
43 85 Primary Sampling Unit (PSU) of the study design. With the support from Central Bureau of  
44  
45 86 Statistics, a total of 400 clusters were sampled. To select a representative sample of cluster; the  
46  
47 87 rural and urban areas within each region were identified as the main sampling strata and the  
48  
49 88 sample was selected in two stages in which ecological belts (Terai, Hill and Mountains) and five  
50  
51  
52  
53  
54  
55  
56  
57  
58  
59  
60

1  
2  
3 89 development region (Central, Eastern, Mid-Western, Western and Far western , stratification was  
4  
5 90 taken into account.  
6  
7

8  
9 91 The survey team members in the field used official or socially mapped household list to select 33  
10  
11 92 households (Secondary Sampling Units – SSUs) from each cluster using systematic random  
12  
13 93 sampling. One participant out of the eligible candidates ( $\geq 20$  years and above, resident in the  
14  
15 94 study area at least 6 months and able to provide informed consent) was selected to take part in  
16  
17 95 the survey using the KISH method. Of 13,200 participants who were approached for interview,  
18  
19 96 12,557 responded to the invitation in Day 1, Among 12,557 who accepted the invitation, only  
20  
21 97 12,148 participants responded in day 2 of clinical setting. For the present study, data from 12,109  
22  
23 98 subjects were available for analyses with a response rate of 91.7%, 39 (0.32%) were excluded,  
24  
25 99 because they refused providing blood and urine samples to evaluate renal function in day 2.  
26  
27  
28  
29

30 100 Data weighting was carried out to make the sampled population comparable to the national  
31  
32 101 population. Data weighting was done using sampling weight. Sample weighting was carried out  
33  
34 102 for probabilities of selection of Primary sampling unit (Ward/cluster), selection of households,  
35  
36 103 and selection of an individual in a household using 2011 population for Nepal with the support  
37  
38 104 from Central Bureau of Statistics.  
39  
40  
41

#### 42 105 **Data collection and measurements**

43  
44  
45 106 Data collection was performed in 400 clusters (figure 1) within 72 districts of Nepal. Data  
46  
47 107 collection teams at each site consisted of five member having academic background of nursing,  
48  
49 108 general medicine, Bachelor in medical laboratory technology or public health.  
50  
51

52  
53 109 Participants' appointment for face to face personal interview at convenient and accessible site or  
54  
55 110 at home on two occasions (Day 1 and Day 2): Following written informed consent, from the  
56  
57

1  
2  
3 111 participants in Day 1, a structured questionnaire was administered to collect information about  
4  
5 112 participants' general health and socio-demographic characteristics. Participants self-reported  
6  
7 113 their health and socio-demographic status, personal and family medical histories and history of  
8  
9 114 medicine used. Information concerning their lifestyle factors (cigarette smoking, alcohol intake)  
10  
11 115 was collected, and then physical and clinical measurements were performed. The clinical  
12  
13 116 examination included measurements of height, weight, waist hip ratio and blood pressure (BP)  
14  
15 117 following standard protocols. Height was measured in centimeters with a portable Bioplus®  
16  
17 118 stature meter and weight with a portable digital seca® 874 weighing scale (Seca, Germany) and  
18  
19 119 recorded in kilograms ensuring that the participant was wearing light clothes and was without  
20  
21 120 footwear. Waist circumference was measured using Seca tape in cm at the level midway between  
22  
23 121 the twelfth rib and the uppermost lateral border of the iliac crest during normal expiration. Blood  
24  
25 122 pressure was measured at least three times with a minimum 3 min, and then averaged to be  
26  
27 123 recorded by using an Omron digital automatic blood pressure monitor model HEM-8712 (Omron  
28  
29 124 Health Care Co., Ltd, Japan) with appropriate sized cuffs <sup>15</sup>. Participants were classified as  
30  
31 125 hypertensive when the Raised BP is defined as having systolic BP  $\geq 140$  mm of Hg and/or  
32  
33 126 diastolic BP  $\geq 90$  mm of Hg during the study, or being previously diagnosed as having  
34  
35 127 hypertension.  
36  
37  
38  
39  
40  
41  
42

43 128 We used fasting, at least an 8-hour fast, and two hour post prandial (PP) blood sample to test  
44  
45 129 various biochemical parameters. Following aseptic technique, blood samples were drawn by a  
46  
47 130 trained enumerators using vacutainers to test laboratory parameters such as fasting blood glucose  
48  
49 131 level, PP blood glucose level, serum creatinine, total cholesterol (TC), triglyceride (TG), high  
50  
51 132 density lipoprotein (HDL) cholesterol, and serum creatinine. The well trained enumerators  
52  
53 133 collected around 10 ml of blood sample at the fasting state and provided 82 grams of glucose  
54  
55  
56  
57  
58  
59  
60

1  
2  
3 134 monohydrate (equivalent to 75 grams of anhydrous glucose) in 250 ml water to drink. Second  
4  
5 135 blood sample was collected at 2 hours of glucose intake. Fasting blood glucose, TC, TG, HDL  
6  
7 136 cholesterol and serum creatinine were measured with the fasting sample and two hours PP  
8  
9 137 sample was used for measuring PP blood glucose only. We carried out biochemical analysis with  
10  
11 138 Biolyzer® 100 Clinical Chemistry Analyzer (Semi-automatic biochemistry analyzer, Analyticon,  
12  
13 139 Germany) and used glucose oxidase-peroxidase (GOD-POD) method for blood glucose,  
14  
15 140 cholesterol oxidase/phenol aminophenazone (CHOD-PAP) for TC, glycerol-3-phosphate  
16  
17 141 oxidase/phenol aminophenazone (GPO-PAP) for TG, HDL cholesterol by poly ethylene glycol/  
18  
19 142 cholesterol oxidase/ phenol aminophenazone (PEG/CHOD-PAP) and serum creatinine measured  
20  
21 143 by Jaffe Reaction method. The laboratory supervisors calculated the low-density lipoprotein  
22  
23 144 (LDL) cholesterol by Freidewald's Formula using TC, TG, and HDL cholesterol.  
24  
25  
26  
27  
28

### 29 145 **Outcome measurements**

30  
31 146 A spot urine sample was collected from single voided specimen to measure urine albumin and  
32  
33 147 creatinine using the same semi-automatic biochemistry analyzer (AnalyticonBiolyzer® 100  
34  
35 148 Clinical Chemistry Analyzer, Germany). Laboratory supervisors measured urine albumin  
36  
37 149 concentration by Turbidimetric tests and urine creatinine concentration by Jaffe Reaction method  
38  
39 150 and finally albumin-creatinine ration (ACR) was calculated and expressed in mg/g. Renal  
40  
41 151 function was evaluated by using estimated GFR (eGFR), based on the widely used 4-variable  
42  
43 152 Modification of Diet in Renal Disease Study (MDRD) equation. A participant was considered to  
44  
45 153 have CKD if the Urine Albumin-to-Creatinine Ratio (uACR) was greater than or equal to 30  
46  
47 154 mg/g and/or estimated Glomerular Filtration Rate (e-GFR) was less than 60 mL/min/1.73 m<sup>2</sup> at  
48  
49 155 baseline and in follow up<sup>16</sup>. The secondary outcome measure was factors associated with CKD in  
50  
51  
52  
53  
54  
55 156 Nepal  
56  
57  
58  
59  
60

### 157 **Follow up of study participants to determine CKD**

158 Participants having either albumin-creatinine ratio (ACR) greater than or equal to 30 mg/g in the  
159 baseline and/or decreased eGFR (<60 mL/min/1.73 m<sup>2</sup>) were revisited again after 3 months in  
160 their place of residence to ensure the chronicity of the renal disease. Written consent was taken  
161 prior to blood and urine sample collection using similar procedures as mentioned above. Out of  
162 1382 participants having a high ACR ratio and/or decreased eGFR, 1202 gave consent. However,  
163 data of ACR was missing for 8 participants making the availability of complete data for 1194  
164 participants for analysis, with a response rate of 86.9%.

### 165 **Data management and analysis**

166 We used android mobile phones inbuilt with data collection software (REMO) to collect data  
167 digitally. Data cleaning including correction of inconsistencies was performed in SPSS version  
168 20.0. We then exported the dataset to STATA version 13 for analysis. To adjust for unequal  
169 probability of selection, appropriate sampling weights with complex sampling analysis were  
170 used to provide valid estimates for the relevant Nepalese population which is based on 2011  
171 national population and housing census data. Results are expressed as a percentage and odds  
172 ratio with 95% CI. Bivariate analysis was conducted to analyze the unconditional association  
173 between each explanatory variable and CKD status. To be included in multivariable modeling,  
174 the level of significance  $\alpha=0.05$  was used during bivariate analysis (i.e., P-value 0.05 was not  
175 statistically significant). Independent variables included demographics (age, gender, ethnicity,  
176 education, province and place of residence), existing comorbidities (hypertension, diabetes,  
177 raised total cholesterol, increased waist hip ratio), any hypertension, any diabetes (self-reported  
178 or physician diagnosed [fasting blood glucose  $\geq 126$  mg/dl]), lifestyles (smoking and alcohol  
179 consumption), overweight or obesity (Body Mass Index [BMI]  $\geq 25$  kg/m<sup>2</sup>).



1  
2  
3 180 Ethnicity/ caste data were self-reported and categorized into six major groups based on the caste  
4  
5 181 coding by government of Nepal and STEPS survey Nepal, 2013 categorization<sup>17</sup>. (1) Upper  
6  
7 182 Caste Groups (population with relatively higher socio economic and education status, mostly  
8  
9 183 Brahmins, Chhetris, Thakuri and Sanyasi);(2) Disadvantaged Janajatis (disadvantaged group of  
10  
11 184 people and also indigenous, with relatively lower socio-economic and education status);(3) Dalit  
12  
13 185 (untouchables, most disadvantaged marginalized group of people, with relatively lower socio-  
14  
15 186 economic and education status); (4) Disadvantaged non Dalit Terai Caste Groups (disadvantaged  
16  
17 187 group of people from the Terai, the lowlands, with relatively lower socio-economic and  
18  
19 188 education status but not the dalit groups); (5)Religious Minorities (Muslim, Christian, etc.); (6)  
20  
21 189 Relatively advantaged Janajatis (indigenous group of people with relatively higher socio-  
22  
23 190 economic status, such as Gurung , Newar and Thakali)  
24  
25  
26  
27  
28  
29 191 Multicollinearity, the variance inflation factor (VIF) was assessed for all the independent  
30  
31 192 variables found to be statistically significant from the bivariate analysis. Multivariable logistic  
32  
33 193 regression modeling was conducted with CKD as a dependent variable using the independent  
34  
35 194 variables identified as being statistically significant from the bivariate analysis.  
36  
37  
38  
39  
40  
41  
42  
43  
44

## 196 **Results**

45 197 A total of 12,109 subjects aged 20 years and above were included in the analyses. Among them  
46  
47 198 61.1% were female, two fifth were adults in the age group 20-59 years (41.6%), one third was  
48  
49 199 from upper caste ethnic group (34.2%), and just above half of them were either illiterate or had  
50  
51 200 no formal schooling (54.6%). Table 1 presents the unweighted numbers and proportions of  
52  
53 201 different demographic characteristics of the study population as measured in the study.  
54  
55  
56  
57  
58  
59  
60

202 **Table 1: Socio-demographic characteristics of the study participants (N=12,109)**

| <b>Characteristics</b>              | <b>n</b> | <b>%</b> |
|-------------------------------------|----------|----------|
| <b>Age</b>                          |          |          |
| 20-39 years                         | 4336     | 35.8     |
| 40-59 years                         | 5034     | 41.6     |
| 60 years and above                  | 2739     | 22.6     |
| <b>Sex</b>                          |          |          |
| Male                                | 4708     | 38.9     |
| Female                              | 7401     | 61.1     |
| <b>Ethnicity</b>                    |          |          |
| Upper caste group                   | 4144     | 34.2     |
| Disadvantaged janajati              | 2546     | 21.0     |
| Relatively advantaged janajati      | 2018     | 16.7     |
| Disadvantaged non-dalit terai caste | 1836     | 15.2     |
| Dalit                               | 1225     | 10.1     |
| Religious minorities                | 340      | 2.8      |
| <b>Education</b>                    |          |          |

|                                        |      |      |
|----------------------------------------|------|------|
| Illiterate/No formal schooling         | 6607 | 54.6 |
| Below secondary (<10 years)            | 2742 | 22.6 |
| Secondary and above ( $\geq 10$ years) | 2760 | 22.8 |
| <b>Province</b>                        |      |      |
| Province 1                             | 2049 | 16.9 |
| Province 2                             | 2003 | 16.5 |
| Bagmati Province                       | 3096 | 25.6 |
| Gandaki Province                       | 1315 | 10.9 |
| Lumbini Province                       | 2030 | 16.8 |
| Karnali Province                       | 588  | 4.9  |
| Sudurpaschim Province                  | 1028 | 8.5  |
| <b>Place of residence</b>              |      |      |
| Rural                                  | 6107 | 50.4 |
| Urban                                  | 6002 | 49.6 |

203

204

205

206  
207**Table 2 Factors associated with chronic kidney disease by univariate and multivariate analysis (N = 12109)**

| Characteristics                       | Count | Chronic Kidney Diseases(CKD) |                  |                  |
|---------------------------------------|-------|------------------------------|------------------|------------------|
|                                       | N     | CKD prevalence (n %)         | COR (95% CI)     | AOR(95% CI)      |
| <b>Age</b>                            |       |                              |                  |                  |
| 20-39 years                           | 4336  | 118 (2.6)                    | 1                | 1                |
| 40-59 years                           | 5034  | 294 (5.8)                    | 2.3(1.8-3.0)***  | 1.4(1.0-1.8)*    |
| 60 years and above                    | 2739  | 316 (11.5)                   | 4.9 (3.8-6.3)*** | 2.6(1.9-3.6)***  |
| <b>Sex</b>                            |       |                              |                  |                  |
| Female                                | 7401  | 415 (5.7)                    | 1                | 1                |
| Male                                  | 4708  | 313 (6.5)                    | 1.2(1.0-1.4)     | 1.2 (0.8-1.6)    |
| <b>Ethnicity</b>                      |       |                              |                  |                  |
| Upper caste                           | 4144  | 212 (5.1)                    | 1                | 1                |
| Disadvantaged<br>Janajati             | 2546  | 138 (5.4)                    | 1.1(0.8-1.4)     | 1.1(0.9-1.5)     |
| Dalit                                 | 1225  | 84 (7.1)                     | 1.4 (1.0-1.9)*   | 1.6 (1.1-2.3) ** |
| Disadvantaged<br>non-Dalitterai caste | 1836  | 116 (6.4)                    | 1.3(0.9-1.7)     | 1.4 ( 0.9-2.1)   |
| Religious<br>minorities               | 340   | 25 (8.0)                     | 1.6 (1.0-2.7)    | 1.7(1.0-2.9)     |
| Relatively                            | 2018  | 153 (7.4)                    | 1.5(1.1-2.0)*    | 1.4(1.0-1.9)*    |

|                                 |      |           |                  |                 |
|---------------------------------|------|-----------|------------------|-----------------|
| advantaged Janajati             |      |           |                  |                 |
| <b>Education</b>                |      |           |                  |                 |
| Illiterate/No formal schooling  | 6607 | 459 (7.0) | 1                | 1               |
| Below secondary (<10 years)     | 2742 | 146 (5.4) | 0.8(0.6-0.9)**   | 1.1 (0.9-1.5)   |
| Secondary and above (≥10 years) | 2760 | 123 (4.5) | 0.6( 0.5-0.8)*** | 1.1 ( 0.7-1.4)  |
| <b>Province</b>                 |      |           |                  |                 |
| Karnali Province                | 588  | 30 (4.7)  | 1                | 1               |
| Province 1                      | 2049 | 100 (5.2) | 1.1 (0.7-1.8)    | 1.1( 0.6-2.0)   |
| Province 2                      | 2003 | 133 (6.6) | 1.4(0.9-2.3)     | 1.2 (0.6-2.2)   |
| Bagmati Province                | 3096 | 196 (6.5) | 1.4(0.9-2.2)     | 1.1 ( 0.6-1.9 ) |
| Gandaki Province                | 1315 | 93 (6.8)  | 1.5 (0.9-2.3)    | 1.2 (0.7-2.0 )  |
| Lumbini Province                | 2030 | 118 (5.7) | 1.2(0.7-2.2)     | 0.9 (0.5-1.6 )  |
| Sudurpashchim Province          | 1028 | 58(5.9)   | 1.3(0.7-2.2)     | 1.4 (0.7-2.6)   |
| <b>Place of residence</b>       |      |           |                  |                 |
| Rural                           | 6107 | 341 (5.8) | 1                | 1               |
| Urban                           | 6002 | 387 (6.5) | 1.2(1.0-1.4)     | 1.0( 0.8-1.3)   |

|                                     |      |            |                   |                  |
|-------------------------------------|------|------------|-------------------|------------------|
| <b>Smoking habit</b>                |      |            |                   |                  |
| Non smoker                          | 8305 | 443 (5.3)  | 1                 | 1                |
| Smokers                             | 3804 | 285 (7.6)  | 1.5(1.2-1.7)***   | 1.2(1.0-1.5)     |
| <b>Alcohol consumption</b>          |      |            |                   |                  |
| No                                  | 9131 | 537 (6.0)  | 1                 | 1                |
| Yes                                 | 2978 | 191 (6.2)  | 1.0(0.9-1.2)      |                  |
| <b>Blood pressure</b>               |      |            |                   |                  |
| Normal                              | 7754 | 256 (3.3)  | 1                 | 1                |
| Raised                              | 4355 | 472 (10.8) | 3.6 (3.0-4.3) *** | 2.4 (2.0-3.0)*** |
| <b>Body mass index (N=12108)#</b>   |      |            |                   |                  |
| Normal                              | 6896 | 377 (5.5)  | 1                 | 1                |
| Underweight                         | 1494 | 88 (6.2)   | 1.1(0.9-1.5)      | 1.1(0.8-1.6)     |
| Overweight and obese                | 3718 | 263 (6.9)  | 1.3(1.1-1.5) **   | 0.9 (0.7-1.1)    |
| <b>Total cholesterol (N=10861)#</b> |      |            |                   |                  |
| Normal                              | 7741 | 398 (5.2)  | 1                 | 1                |
| Raised                              | 3120 | 254 (8.2)  | 1.6(1.3-2.0) ***  | 1.3(1.0-1.6)*    |

|                                               |       |                        |                   |                  |
|-----------------------------------------------|-------|------------------------|-------------------|------------------|
| <b>Waist hip ratio</b><br><b>(N=11979)#</b>   |       |                        |                   |                  |
| Normal                                        | 5095  | 282 (5.4)              | 1                 | 1                |
| Increased                                     | 6884  | 440 (6.6)              | 1.2(1.0-1.5) *    | 1.6( 1.2-2.3) *  |
| <b>Diabetes Mellitus</b><br><b>(N=11271)#</b> |       |                        |                   |                  |
| No                                            | 10393 | 506 (4.8)              | 1                 | 1                |
| Yes                                           | 878   | 172 (19.8)             | 4.9( 3.8-6.2) *** | 3.2(2.5-4.1) *** |
| Total                                         | 12109 | 6.0 (95% CI: 5.5 -6.6) |                   |                  |

Definition of chronic kidney disease status: Urinary albumin to creatinine ratio of  $\geq 30$  mg/g and/or glomerular filtration rate  $< 60$  ml/min/1.73 m<sup>2</sup> both at baseline and follow up)

OR: odds ratio; CI: Confidence interval; COR: Crude odds ratio; AOR: Adjusted odds ratio. Adjusted OR estimated from the stepwise multivariate logistic regression model with all the above variables added except alcohol consumption.

<sup>1</sup> Reference group.

\* Indicated the corresponding variable had significant impact on the occurrence of CKD.

\*p value $\leq 0.05$  \*\*p value $\leq 0.01$  \*\*\*p value $\leq 0.0001$

# Missing value; refusal for blood sample collection led to variation in the sample size

208

209

1  
2  
3  
4 **211 Prevalence of CKD**

5  
6 212 The overall prevalence of CKD based on the eGFR MDRD equation, (urinary albumin to  
7  
8 213 creatinine ratio of  $\geq 30$  mg/g and/or glomerular filtration rate  $< 60$  both at baseline and follow up)  
9  
10 214 was 6.0% (95% CI: 5.5-6.6). The prevalence was higher in males compared to female (6.5 vs  
11  
12 215 5.7) though not statistically significant. Prevalence increased with increasing age (11.5% among  
13  
14 216 60 years and above and 2.6 % among 20-39 years age group). (Table 2). The mean ( $\pm$ SD) eGFR  
15  
16 217 in baseline was 92.6 ( $\pm$  22.1) mL/min/1.73 m<sup>2</sup> for male and 88.2 ( $\pm$  20.5) mL/min/1.73 m<sup>2</sup> for  
17  
18 218 female ( figure 2) .The mean ( $\pm$  SD) eGFR was 88.0 ( $\pm$  25.7) mL/min/1.73 m<sup>2</sup> for male and 81.1  
19  
20 219 ( $\pm$  23.4) mL/min/1.73 m<sup>2</sup> for female in follow up(figure 3).  
21  
22  
23  
24  
25 220  
26  
27  
28  
29  
30  
31  
32  
33  
34  
35  
36  
37  
38  
39  
40  
41  
42  
43  
44  
45  
46  
47  
48  
49  
50  
51  
52  
53  
54  
55  
56  
57  
58  
59  
60



1  
2  
3 221  
4 222  
5  
6  
7

### 223 **Factors associated with CKD**

224 The multivariable analyses to investigate the association of independent factors and CKD are  
225 shown in Table 2. In the bivariate analysis, age, smoking, BMI, ethnicity, education, having  
226 diabetes mellitus (DM), being hypertensive, increased waist hip ratio, and having raised total  
227 cholesterol were found to be statistically significantly associated with CKD. Therefore, those 9  
228 factors including place of residence, province, and sex of participants (P-value  $\leq 0.25$ ) were  
229 considered in the multiple logistic models. After adjustment, only six variables: age, ethnicity,  
230 diabetes, hypertension, raised TC, and increased waist hip ratio, were found to be significant  
231 predictors of CKD. There was a strong positive association between age and CKD, i.e. the odds  
232 of having CKD were about 1.4 (95% CI : 1.0-1.8) and 2.6(95% CI: 1.9-3.6) times higher for  
233 people aged 40–59 years and  $\geq 60$  years respectively, compared with people aged 20-39 years.  
234 Participants with DM had about 3.2 (95% CI: 2.5-4.1) times higher odds of occurrence of CKD  
235 than non-diabetic participants. Similarly, participants with raised BP had 2.4 (95% CI: 2.0-3.0)  
236 higher odds of having CKD than non-hypertensive/normal participants.  
237 Participants with raised total cholesterol had 1.3 (95% CI: 1.0-1.6) times higher odds of having  
238 CKD relative to participants who had normal cholesterol level, whereas those with raised waist  
239 hip ratio had 1.6(95% CI: 1.2-2.3) times higher odds than normal participants to have CKD.  
240 Individuals who were classified as Dalit by ethnicity were 1.6 (95% CI: 1.1-2.3) times or  
241 relatively advantaged janajati had 1.4 (95% CI: 1.0-1.9) times higher odds of having CKD when  
242 compared to individuals with an upper caste.

## 243 Discussion

244 This is the first large scale nationwide population based representative study to report prevalence  
245 of and factors associated with CKD in Nepal among population aged 20 years and above. In the  
246 absence of population validated e-GFR equation for our population, MDRD equation as done in  
247 previous studies was chosen over the CKD-EPI equation to facilitate comparison of results. The  
248 findings show that approximately one in every sixteen adults (6%) is affected by CKD in Nepal.  
249 This value is higher than the population based study conducted in Morocco 5.1%<sup>18</sup> and Vietnam  
250 3.1%<sup>19</sup>, almost similar to 6.8% in South Korea <sup>20</sup>, east African countries including Uganda and  
251 Kenya<sup>21</sup> but much lower than the prevalence of many Asian countries with 10.2% in  
252 china<sup>22</sup>, 17.5% in Thailand<sup>23</sup>, 18.9% in Iran<sup>24</sup> and 17.2 % in India <sup>25</sup>. Prevalence of CKD in  
253 Nepal is lower than the global burden of disease study estimated prevalence of 8%–10%<sup>3</sup>  
254 globally. However, these differences in the prevalence of CKD may be in part due to the  
255 differences in CKD diagnostic criteria, study design, laboratory methods and lack of validated  
256 measures for eGFR for Nepalese population.

257 Our multivariable analysis found that CKD was independently associated with older age,  
258 hypertension, diabetes, raised TC, dalit and relatively advantaged janajati ethnicity and increased  
259 waist hip ratio ( $p < 0.05$  for each) which are all major NCDs risk factors and consistent with  
260 previous findings<sup>26–30</sup>. Age is a well-established risk factor for development of CKD<sup>31</sup>. As  
261 expected, age was found to be the most strongly associated risk factor in our study, we observed  
262 nearly three times higher odds of occurrence of CKD among people aged 60 years or older  
263 compared to people aged 20 to 39 years.

264 In line with other surveys in South East Asia, our findings show that the odds of CKD  
265 occurrence was significantly and independently higher by around 2-fold with the presence of

1  
2  
3 266 hypertension; this supports previous reports<sup>32–35</sup> indicating the importance of early detection and  
4  
5 267 treatment of hypertension in Nepal. Similarly, people with diabetes mellitus had more than three  
6  
7 268 times higher odds of occurrence of CKD. Studies around the world show diabetes to be  
8  
9 269 independently associated with development of CKD<sup>36,37</sup>. A survey across 10 Asian countries  
10  
11 270 showed that the most common cause of End Stage Renal Disease (ESRD) in 9 out of 10  
12  
13 271 countries was diabetic nephropathy<sup>38</sup>. In addition; elevated total cholesterol though marginal was  
14  
15 272 associated with higher odds of CKD.  
16  
17  
18  
19

20 273 Nepal is an ethnically diverse country with more than 125 castes/ethnic groups. Interestingly  
21  
22 274 ethnicity/caste was another factor associated with CKD in our study. Compared with upper caste  
23  
24 275 participants, Dalit participants had a significantly higher prevalence of CKD. The mechanism  
25  
26 276 underlying these differences might be multifactorial, including cultural differences such as  
27  
28 277 smoking and drinking habit, lifestyle and genetic factors. By ethnicity, Dalit group of people are  
29  
30 278 considered as one of the most marginalized in terms of socioeconomic, education, political and  
31  
32 279 health indicators, resulting in decreased access to resources and higher vulnerability to poor  
33  
34 280 health outcomes. This calls for future studies regarding CKD on ethnic differences.  
35  
36  
37  
38

39 281  
40  
41 282 Despite finding an association between CKD and several known established risk factors  
42  
43 283 including waist hip ratio, no association was found between CKD and BMI. The correlation  
44  
45 284 between CKD and waist hip ratio and not BMI is plausible since this ratio is a more sensitive  
46  
47 285 marker for central obesity, metabolic syndrome and potentially less influenced by muscle mass  
48  
49 286 than BMI, this is in agreement with earlier studies<sup>28,39,40</sup>. The association between smoking and  
50  
51 287 CKD was reported in bivariate analysis only in our study.  
52  
53  
54  
55  
56  
57  
58  
59  
60

1  
2  
3 288 In general, the prevalence of CKD was higher among women compared to men, and this  
4  
5 289 difference has been demonstrated in the past by several population based cross sectional  
6  
7 290 studies.<sup>41</sup> However in the present study, though not statistically significant, we found slightly  
8  
9 291 higher prevalence of CKD among male participants. These discrepancies in the prevalence may  
10  
11 292 be due to the traditional risk factors such as hypertension and hyperglycemia being prevalent  
12  
13 293 among male participant in our study. We also could not find significant association between  
14  
15 294 CKD and alcohol consumption, place of residence, and provinces.  
16  
17  
18  
19

20 295 Traditional risk factors such as diabetes and hypertension are the major cause of CKD in most  
21  
22 296 developed and developing countries<sup>42,43</sup>, and several other nontraditional and environmental risk  
23  
24 297 factors such as infectious diseases, analgesic abuse, exposure to heavy metal (Lead, Arsenic,  
25  
26 298 Mercury and Uranium), pesticides, herbal medications, and environmental pollution, impose an  
27  
28 299 additionally threat worsening CKD especially in developing countries<sup>44</sup> including Nepal .  
29  
30 300 However, we lack information about environmental and some of the nontraditional risk factor,  
31  
32 301 which could be used to quantify the effects of these factors on CKD  
33  
34  
35  
36

37 302 Our study poses several strengths. To the best of our knowledge, this is the first national survey  
38  
39 303 with a large representative population-based sample of the adult population to report prevalence  
40  
41 304 of CKD in Nepal as per Kidney Disease Outcomes Quality Initiative (KDOQI) clinical practice  
42  
43 305 guideline; using (eGFR <60mL/min/1.73m<sup>2</sup>, presence of albuminuria $\geq$ 30mg/g and chronicity  
44  
45 306 confirmed by repeated testing after three months) to confirm presence of CKD. The study has  
46  
47 307 used a validated standardized estimation of the glomerular filtration rate by the MDRD equation  
48  
49 308 and all necessary protocols, standard operating procedures and quality assurance mechanism  
50  
51 309 were followed to ensure the quality of data collection. Additional strengths of the study include a  
52  
53 310 high overall response rate and analyses based on survey weights which ensure geographic  
54  
55  
56  
57

1  
2  
3 311 representativeness of the study making the study findings generalizable to the general  
4  
5 312 population. At the same time, potential limitations include dependency on estimation of GFR,  
6  
7  
8 313 rather than direct measurement using injection of an exogenous marker factors as well as cross-  
9  
10 314 sectional design of the study which does not permit inferences regarding causal relationships.  
11  
12

### 13 315 **Conclusions**

14  
15 316 This is the first population-based epidemiological survey of CKD using the protocols  
16  
17 317 recommended by KDOQI in Nepal. The prevalence of CKD was found to be 6.0% with higher  
18  
19 318 prevalence among male, participants with no formal education, urban residents, smokers and  
20  
21 319 participants with overweight and obese. CKD was independently associated with older age,  
22  
23 320 hypertension, diabetes mellitus, increased waist hip ratio, raised total cholesterol and individual  
24  
25 321 belonging to the Dalit caste by ethnicity. Our findings highlight the need for early preventive  
26  
27 322 measures to manage predisposing conditions such as diabetes and hypertension which could  
28  
29 323 ultimately lead to CKD and to reduce the prevalence and mortality arising from the associated  
30  
31 324 comorbidities in Nepal.  
32  
33  
34  
35  
36  
37  
38  
39

### 40 326 **Declarations**

41  
42 327 **Acknowledgements:** The authors would like to thank all the individuals and organizations that  
43  
44 328 provided technical support for the design and implementation of the main survey. The authors  
45  
46 329 are grateful Dr. Shiva raj Mishra, Research Fellow in Epidemiology and Intervention Melbourne  
47  
48 330 School of Population and Global Health, for reviewing the manuscript.  
49  
50  
51

52 331 **Funding:** The authors have not received specific grant from any agency for this research.  
53  
54

55 332 **Competing interests:** The authors declare no conflict of interest.  
56  
57

1  
2  
3 333 **Data sharing statement:** The datasets used and/or analyzed will be made from the  
4  
5 334 corresponding author on reasonable request  
6  
7

8 335 **Author's contributions:** KBK, MD, KKA and AKJ were involved with conception ,design and  
9  
10 336 implemented the study. AP, NS and NKM, implemented the study on the field, completed data  
11  
12 337 collection, overall supervision of the study. AP drafted the manuscript and conducted data  
13  
14 338 analysis with input from NS, BB, LG, NKM and DK. SKS, PG, VGL, UK, DAG all contributed  
15  
16 339 to critical revision of the manuscript, provided feedback on the initial draft and approved the  
17  
18 340 final version. SKS, KKA, NS, PG, and MD were also involved responding to the comments  
19  
20 341 raised by BMJ Open Journal reviewers; each authors reviewed the reversed manuscript critically  
21  
22 342 and provided improvements, accepts accountability for their contributions. The corresponding  
23  
24 343 author attests that all listed authors meet the authorship criteria.  
25  
26  
27  
28  
29

30 344 **Ethics statement:** The study protocol was approved by the Ethical Review Board (ERB) of  
31  
32 345 Nepal Health Research Council, Government of Nepal (Reg.no.110/2016). Written informed  
33  
34 346 consent was taken from all participants before proceeding for data collection.  
35  
36  
37

38 347 **Patient and public involvement:** Patients and/or the public were not involved in the design, or  
39  
40 348 conduct, or reporting, or dissemination plans of this research.  
41  
42

43 349 **Patient consent for publication:** Not required.  
44  
45  
46  
47  
48  
49  
50  
51  
52  
53  
54  
55  
56  
57

350 **References**

- 351 1. Xie Y, Bowe B, Mokdad AH, et al. Analysis of the Global Burden of Disease study  
352 highlights the global, regional, and national trends of chronic kidney disease epidemiology  
353 from 1990 to 2016. *Kidney Int.* 2018;94(3):567-581.
- 354 2. Institute for Health Metrics and Evaluation (IHME). *GBD Compare Data.*; 2019.
- 355 3. Bikbov B, Purcell CA, Levey AS, et al. Global, regional, and national burden of chronic  
356 kidney disease, 1990--2017: a systematic analysis for the Global Burden of Disease Study  
357 2017. *Lancet.* 2020;395(10225):709-733.
- 358 4. Stanifer JW, Muiru A, Jafar TH, Patel UD. Chronic kidney disease in low-and middle-  
359 income countries. *Nephrol Dial Transplant.* 2016;31(6):868-874.
- 360 5. Nugent RA, Fathima SF, Feigl AB, Chyung D. The burden of chronic kidney disease on  
361 developing nations: a 21st century challenge in global health. *Nephron Clin Pract.*  
362 2011;118(3):c269--c277.
- 363 6. Agarwal SK, Dash SC, Irshad M, Raju S, Singh R, Pandey RM. Prevalence of chronic  
364 renal failure in adults in Delhi, India. *Nephrol Dial Transplant.* 2005;20(8):1638-1642.
- 365 7. Singh NP, Ingle GK, Saini VK, et al. Prevalence of low glomerular filtration rate,  
366 proteinuria and associated risk factors in North India using Cockcroft-Gault and  
367 Modification of Diet in Renal Disease equation: an observational, cross-sectional study.  
368 *BMC Nephrol.* 2009;10(1):1-13.
- 369 8. Jafar TH, Schmid CH, Levey AS. Serum creatinine as marker of kidney function in South  
370 Asians: a study of reduced GFR in adults in Pakistan. *J Am Soc Nephrol.*

- 1  
2  
3 371 2005;16(5):1413-1419.  
4  
5  
6 372 9. Sharma SK, Zou H, Togtokh A, et al. Burden of CKD, proteinuria, and cardiovascular risk  
7  
8 among Chinese, Mongolian, and Nepalese participants in the International Society of  
9 373  
10 Nephrology screening programs. *Am J kidney Dis.* 2010;56(5):915-927.  
11 374  
12  
13  
14 375 10. Ene-Iordache B, Perico N, Bikbov B, et al. Chronic kidney disease and cardiovascular risk  
15  
16 376 in six regions of the world (ISN-KDDC): a cross-sectional study. *Lancet Glob Heal.*  
17  
18 2016;4(5):e307--e319.  
19 377  
20  
21  
22 378 11. Sharma SK, Dhakal S, Thapa L, et al. Community-based screening for chronic kidney  
23  
24 379 disease, hypertension and diabetes in Dharan. Published online 2013.  
25  
26  
27 380 12. Dhimal M, Bista B, Bhattarai S, Dixit LP, Hyder MKA, Agrawal N, Rani M JA. *Non*  
28  
29 381 *Communicable Disease Risk Factors: STEPS Survey Nepal 2019.*  
30  
31  
32 382 13. Nepal Health Research Council. *Population Based Prevalence of Selected Non-*  
33  
34 383 *Communicable Disease in Nepal.*; 2019. [http://nhrc.gov.np/publication/population-based-](http://nhrc.gov.np/publication/population-based-prevalence-of-selected-non-communicable-diseases-in-nepal/)  
35  
36 384 [prevalence-of-selected-non-communicable-diseases-in-nepal/](http://nhrc.gov.np/publication/population-based-prevalence-of-selected-non-communicable-diseases-in-nepal/)  
37  
38  
39  
40 385 14. Aryal KK, Neupane S, Mehata S, et al. Non communicable diseases risk factors: STEPS  
41  
42 386 Survey Nepal 2013 Kathmandu. *Nepal Nepal Heal Res Counc Sch.* Published online 2014.  
43  
44  
45  
46 387 15. Chobanian A V, Bakris GL, Black HR, et al. Seventh report of the joint national  
47  
48 388 committee on prevention, detection, evaluation, and treatment of high blood pressure.  
49  
50 389 *Hypertension.* 2003;42(6):1206-1252.  
51  
52  
53  
54 390 16. Levey AS, Eckardt K-U, Tsukamoto Y, et al. Definition and classification of chronic  
55  
56 391 kidney disease: a position statement from Kidney Disease: Improving Global Outcomes  
57



- 1  
2  
3 392 (KDIGO). *Kidney Int.* 2005;67(6):2089-2100.  
4  
5  
6 393 17. STEP I. Non communicable diseases risk factors: steps survey Nepal. 2013.  
7  
8  
9 394 18. Gharbi MB, Elseviers M, Zamd M, et al. Chronic kidney disease, hypertension, diabetes,  
10  
11 395 and obesity in the adult population of Morocco: how to avoid “over”-and “under”-  
12  
13 396 diagnosis of CKD. *Kidney Int.* 2016;89(6):1363-1371.  
14  
15  
16  
17 397 19. Ito J, Dung DTK, Vuong MT, et al. Impact and perspective on chronic kidney disease in  
18  
19 398 an Asian developing country: a large-scale survey in North Vietnam. *Nephron Clin Pract.*  
20  
21 399 2008;109(1):c25--c32.  
22  
23  
24  
25 400 20. Jang SY, Kim I-H, Ju EY, Ahn SJ, Kim D-K, Lee SW. Chronic kidney disease and  
26  
27 401 metabolic syndrome in a general Korean population: the Third Korea National Health and  
28  
29 402 Nutrition Examination Survey (KNHANES III) Study. *J Public Health (Bangkok).*  
30  
31 403 2010;32(4):538-546.  
32  
33  
34  
35 404 21. Muiro AN, Charlebois ED, Balzer LB, et al. The epidemiology of chronic kidney disease  
36  
37 405 (CKD) in rural East Africa: a population-based study. *PLoS One.* 2020;15(3):e0229649.  
38  
39  
40 406 22. Zhang L, Wang F, Wang L, et al. Prevalence of chronic kidney disease in China: a cross-  
41  
42 407 sectional survey. *Lancet.* 2012;379(9818):815-822.  
43  
44  
45  
46 408 23. Ingsathit A, Thakkinstian A, Chairasert A, et al. Prevalence and risk factors of chronic  
47  
48 409 kidney disease in the Thai adult population: Thai SEEK study. *Nephrol Dial Transplant.*  
49  
50 410 2010;25(5):1567-1575.  
51  
52  
53  
54 411 24. Hosseinpanah F, Kasraei F, Nassiri AA, Azizi F. High prevalence of chronic kidney  
55  
56 412 disease in Iran: a large population-based study. *BMC Public Health.* 2009;9(1):1-8.  
57  
58  
59  
60

- 1  
2  
3 413 25. Singh AK, Farag YMK, Mittal B V, et al. Epidemiology and risk factors of chronic kidney  
4  
5 414 disease in India--results from the SEEK (Screening and Early Evaluation of Kidney  
6  
7 415 Disease) study. *BMC Nephrol.* 2013;14(1):1-10.  
8  
9  
10  
11 416 26. Hannan M, Ansari S, Meza N, et al. Risk factors for CKD progression: overview of  
12  
13 417 findings from the CRIC study. *Clin J Am Soc Nephrol.* 2021;16(4):648-659.  
14  
15  
16 418 27. Tsuruya K, Yoshida H, Nagata M, et al. Association of the triglycerides to high-density  
17  
18 419 lipoprotein cholesterol ratio with the risk of chronic kidney disease: analysis in a large  
19  
20 420 Japanese population. *Atherosclerosis.* 2014;233(1):260-267.  
21  
22  
23  
24 421 28. He Y, Li F, Wang F, Ma X, Zhao X, Zeng Q. The association of chronic kidney disease  
25  
26 422 and waist circumference and waist-to-height ratio in Chinese urban adults. *Medicine*  
27  
28 423 *(Baltimore).* 2016;95(25).  
29  
30  
31  
32 424 29. Alkerwi A, Sauvageot N, El Bahi I, et al. Prevalence and related risk factors of chronic  
33  
34 425 kidney disease among adults in Luxembourg: evidence from the observation of  
35  
36 426 cardiovascular risk factors (ORISCAV-LUX) study. *BMC Nephrol.* 2017;18(1):1-10.  
37  
38  
39  
40 427 30. Ping H, Zhang X, Xing N. Prevalence of chronic kidney disease in China. *Lancet.*  
41  
42 428 2012;380(9838):216.  
43  
44  
45 429 31. O'Hare AM, Choi AI, Bertenthal D, et al. Age affects outcomes in chronic kidney disease.  
46  
47 430 *J Am Soc Nephrol.* 2007;18(10):2758-2765.  
48  
49  
50  
51 431 32. Li Z-Y, Xu G-B, Xia T-A, Wang H-Y. Prevalence of chronic kidney disease in a middle  
52  
53 432 and old-aged population of Beijing. *Clin Chim acta.* 2006;366(1-2):209-215.  
54  
55  
56 433 33. Safarinejad MR, others. The epidemiology of adult chronic kidney disease in a  
57

- 1  
2  
3 434 population-based study in Iran: prevalence and associated risk factors. *JN J Nephrol.*  
4  
5 435 2009;22(1):99.  
6  
7  
8  
9 436 34. Fiseha T, Kassim M, Yemane T. Prevalence of chronic kidney disease and associated risk  
10  
11 437 factors among diabetic patients in southern Ethiopia. *Am J Heal Res.* 2014;2(4):216-221.  
12  
13  
14 438 35. Price CP, Finney H. Developments in the assessment of glomerular filtration rate. *Clin*  
15  
16 439 *Chim acta.* 2000;297(1-2):55-66.  
17  
18  
19 440 36. Damtie S, Biadgo B, Baynes HW, et al. Chronic kidney disease and associated risk factors  
20  
21 441 assessment among diabetes mellitus patients at a tertiary hospital, Northwest Ethiopia.  
22  
23 442 *Ethiop J Health Sci.* 2018;28(6).  
24  
25  
26  
27 443 37. Duan J, Wang C, Liu D, et al. Prevalence and risk factors of chronic kidney disease and  
28  
29 444 diabetic kidney disease in Chinese rural residents: a cross-sectional survey. *Sci Rep.*  
30  
31 445 2019;9(1):1-11.  
32  
33  
34  
35 446 38. Lee G. End-stage renal disease in the Asian-Pacific region. In: *Seminars in*  
36  
37 447 *Nephrologyjourn.* Vol 23. ; 2003:107-114.  
38  
39  
40 448 39. Elsayed EF, Tighiouart H, Weiner DE, et al. Waist-to-hip ratio and body mass index as  
41  
42 449 risk factors for cardiovascular events in CKD. *Am J Kidney Dis.* 2008;52(1):49-57.  
43  
44  
45  
46 450 40. Silva MIB, da Silva Lemos CC, Torres MRSG, Bregman R. Waist-to-height ratio: an  
47  
48 451 accurate anthropometric index of abdominal adiposity and a predictor of high HOMA-IR  
49  
50 452 values in nondialyzed chronic kidney disease patients. *Nutrition.* 2014;30(3):279-285.  
51  
52  
53  
54 453 41. Bikbov B, Perico N, Remuzzi G. on behalf of the GBD Genitourinary Diseases Expert  
55  
56 454 Group. Disparities in chronic kidney disease prevalence among males and females in 195  
57  
58  
59  
60

- 1  
2  
3 455 countries: analysis of the Global Burden of Disease 2016 study. *Nephron*.  
4  
5 456 2018;139(4):313-318.  
6  
7  
8  
9 457 42. Koye DN, Shaw JE, Reid CM, Atkins RC, Reutens AT, Magliano DJ. Incidence of  
10  
11 458 chronic kidney disease among people with diabetes: a systematic review of observational  
12  
13 459 studies. *Diabet Med*. 2017;34(7):887-901.  
14  
15  
16 460 43. Garofalo C, Borrelli S, Pacilio M, et al. Hypertension and Prehypertension and Prediction  
17  
18 461 of Development of Decreased Estimated GFR in the General Population: A Meta-analysis  
19  
20 462 of Cohort Studies. *Am J Kidney Dis*. 2016;67(1):89-97. doi:10.1053/j.ajkd.2015.08.027  
21  
22  
23  
24 463 44. Xu X, Nie S, Ding H, Hou FF. Environmental pollution and kidney diseases. *Nat Rev*  
25  
26 464 *Nephrol*. 2018;14(5):313-324.  
27  
28  
29  
30 465  
31  
32

33 466 **Figure legend**

34  
35  
36 467 **Figure 1: Map of Nepal showing the study clusters (400 clusters)**

37  
38  
39 468 **Figure 2: Histogram of estimated glomerular filtration rate (eGFR) distribution among**  
40  
41 469 **12097 participants in baseline by sex**

42  
43  
44 470 **Figure 3: Histogram of estimated glomerular filtration rate (eGFR) distribution among**  
45  
46 471 **1194 participants in follow up by sex**

47  
48  
49  
50 472  
51  
52  
53 473  
54  
55  
56  
57  
58  
59  
60

1  
2  
3 474  
4  
5  
6 475  
7  
8  
9 476  
10  
11  
12 477  
13  
14  
15 478  
16  
17  
18 479  
19  
20  
21 480  
22  
23  
24 481  
25  
26  
27 482  
28  
29  
30 483  
31  
32  
33 484  
34  
35  
36 485  
37  
38  
39 486  
40  
41  
42  
43  
44  
45  
46  
47  
48  
49  
50  
51  
52  
53  
54  
55  
56  
57  
58  
59  
60

For peer review only

1  
2  
3  
4  
5  
6  
7  
8  
9  
10  
11  
12  
13  
14  
15  
16  
17  
18  
19  
20  
21  
22  
23  
24  
25  
26  
27  
28  
29  
30  
31  
32  
33  
34  
35  
36  
37  
38  
39  
40  
41  
42  
43  
44  
45  
46  
47  
48  
49  
50  
51  
52  
53  
54  
55  
56  
57  
58  
59  
60

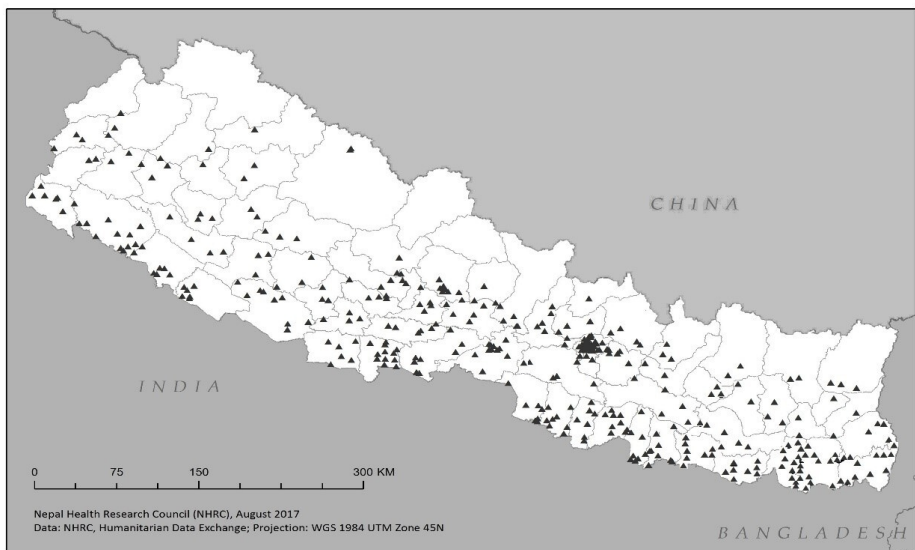

Figure 1: Map of Nepal showing the study clusters (400 clusters)

56x38mm (600 x 600 DPI)

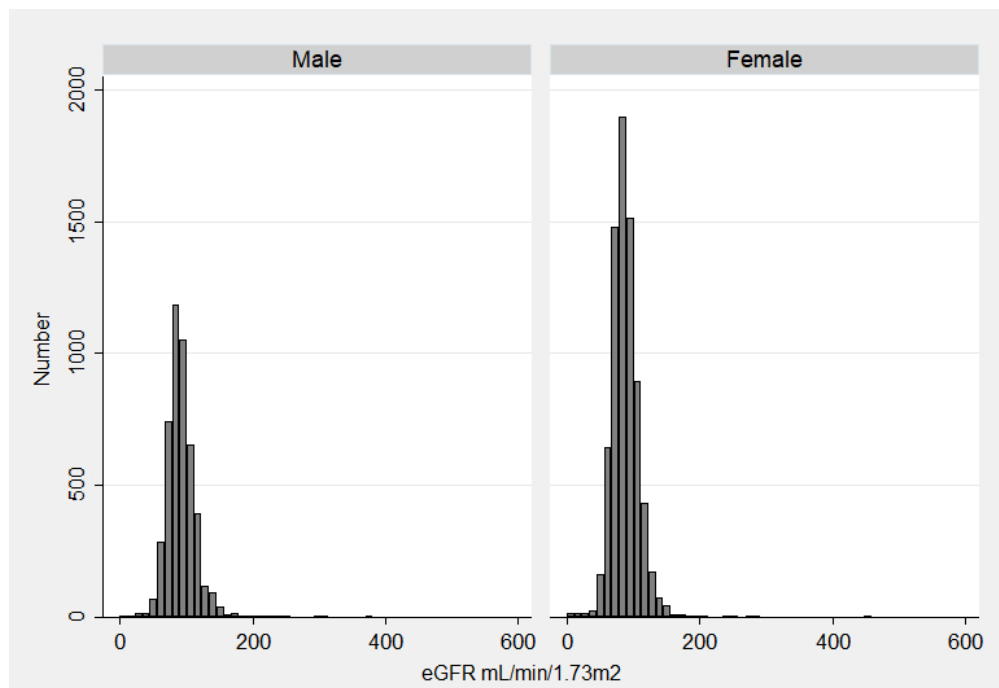

Figure 2: Histogram of estimated glomerular filtration rate (eGFR) distribution among 12097 participants in the baseline by sex

1  
2  
3  
4  
5  
6  
7  
8  
9  
10  
11  
12  
13  
14  
15  
16  
17  
18  
19  
20  
21  
22  
23  
24  
25  
26  
27  
28  
29  
30  
31  
32  
33  
34  
35  
36  
37  
38  
39  
40  
41  
42  
43  
44  
45  
46  
47  
48  
49  
50  
51  
52  
53  
54  
55  
56  
57  
58  
59  
60

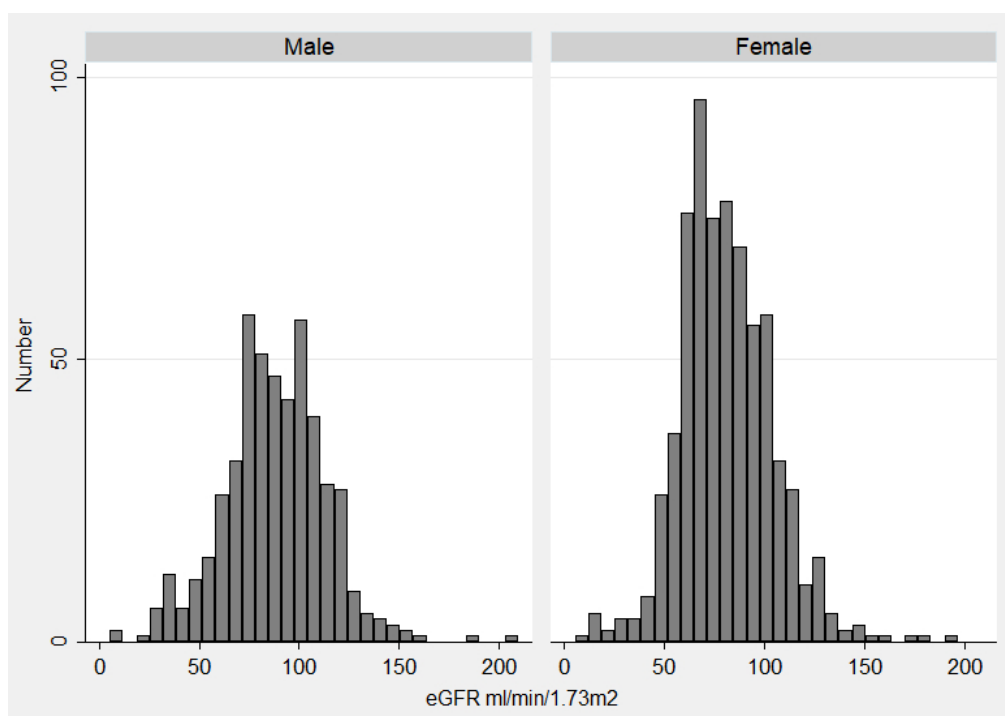

Figure 3: Histogram of estimated glomerular filtration rate (eGFR) distribution among 1194 participants in follow up by sex



STROBE Statement—Checklist of items that should be included in reports of *cross-sectional studies*

|                              | Item No | Recommendation                                                                                                                                                                                    | Page No |
|------------------------------|---------|---------------------------------------------------------------------------------------------------------------------------------------------------------------------------------------------------|---------|
| <b>Title and abstract</b>    | 1       | (a) Indicate the study's design with a commonly used term in the title or the abstract                                                                                                            | 2       |
|                              |         | (b) Provide in the abstract an informative and balanced summary of what was done and what was found                                                                                               | 2-3     |
| <b>Introduction</b>          |         |                                                                                                                                                                                                   |         |
| Background/rationale         | 2       | Explain the scientific background and rationale for the investigation being reported                                                                                                              | 4-5     |
| Objectives                   | 3       | State specific objectives, including any prespecified hypotheses                                                                                                                                  | 5       |
| <b>Methods</b>               |         |                                                                                                                                                                                                   |         |
| Study design                 | 4       | Present key elements of study design early in the paper                                                                                                                                           | 5-6     |
| Setting                      | 5       | Describe the setting, locations, and relevant dates, including periods of recruitment, exposure, follow-up, and data collection                                                                   | 5-7     |
| Participants                 | 6       | (a) Give the eligibility criteria, and the sources and methods of selection of participants                                                                                                       | 5-6     |
| Variables                    | 7       | Clearly define all outcomes, exposures, predictors, potential confounders, and effect modifiers. Give diagnostic criteria, if applicable                                                          | 8       |
| Data sources/<br>measurement | 8*      | For each variable of interest, give sources of data and details of methods of assessment (measurement). Describe comparability of assessment methods if there is more than one group              | 8-9     |
| Bias                         | 9       | Describe any efforts to address potential sources of bias                                                                                                                                         | 8-9     |
| Study size                   | 10      | Explain how the study size was arrived at                                                                                                                                                         | 5-6     |
| Quantitative variables       | 11      | Explain how quantitative variables were handled in the analyses. If applicable, describe which groupings were chosen and why                                                                      | 8-9     |
| Statistical methods          | 12      | (a) Describe all statistical methods, including those used to control for confounding                                                                                                             | 8-9     |
|                              |         | (b) Describe any methods used to examine subgroups and interactions                                                                                                                               | 8-9     |
|                              |         | (c) Explain how missing data were addressed                                                                                                                                                       | 10      |
|                              |         | (d) If applicable, describe analytical methods taking account of sampling strategy                                                                                                                | 5       |
|                              |         | (e) Describe any sensitivity analyses                                                                                                                                                             | na      |
| <b>Results</b>               |         |                                                                                                                                                                                                   |         |
| Participants                 | 13*     | (a) Report numbers of individuals at each stage of study—eg numbers potentially eligible, examined for eligibility, confirmed eligible, included in the study, completing follow-up, and analysed | 5-6     |
|                              |         | (b) Give reasons for non-participation at each stage                                                                                                                                              | 5-7     |
|                              |         | (c) Consider use of a flow diagram                                                                                                                                                                | na      |
| Descriptive data             | 14*     | (a) Give characteristics of study participants (eg demographic, clinical, social) and information on exposures and potential confounders                                                          | 10-17   |
|                              |         | (b) Indicate number of participants with missing data for each variable of interest                                                                                                               | 10-17   |
| Outcome data                 | 15*     | Report numbers of outcome events or summary measures                                                                                                                                              | 10-17   |
| Main results                 | 16      | (a) Give unadjusted estimates and, if applicable, confounder-adjusted estimates and their precision (eg, 95% confidence interval). Make clear                                                     | 10-17   |

|                          |    |                                                                                                                                                                            |       |
|--------------------------|----|----------------------------------------------------------------------------------------------------------------------------------------------------------------------------|-------|
|                          |    | which confounders were adjusted for and why they were included                                                                                                             |       |
|                          |    | (b) Report category boundaries when continuous variables were categorized                                                                                                  | 10-17 |
|                          |    | (c) If relevant, consider translating estimates of relative risk into absolute risk for a meaningful time period                                                           | na    |
| Other analyses           | 17 | Report other analyses done—eg analyses of subgroups and interactions, and sensitivity analyses                                                                             | 10-17 |
| <b>Discussion</b>        |    |                                                                                                                                                                            |       |
| Key results              | 18 | Summarise key results with reference to study objectives                                                                                                                   | 17    |
| Limitations              | 19 | Discuss limitations of the study, taking into account sources of potential bias or imprecision. Discuss both direction and magnitude of any potential bias                 | 21    |
| Interpretation           | 20 | Give a cautious overall interpretation of results considering objectives, limitations, multiplicity of analyses, results from similar studies, and other relevant evidence | 17-21 |
| Generalisability         | 21 | Discuss the generalisability (external validity) of the study results                                                                                                      | 21    |
| <b>Other information</b> |    |                                                                                                                                                                            |       |
| Funding                  | 22 | Give the source of funding and the role of the funders for the present study and, if applicable, for the original study on which the present article is based              | 22    |

\*Give information separately for exposed and unexposed groups.

**Note:** An Explanation and Elaboration article discusses each checklist item and gives methodological background and published examples of transparent reporting. The STROBE checklist is best used in conjunction with this article (freely available on the Web sites of PLoS Medicine at <http://www.plosmedicine.org/>, Annals of Internal Medicine at <http://www.annals.org/>, and Epidemiology at <http://www.epidem.com/>). Information on the STROBE Initiative is available at [www.strobe-statement.org](http://www.strobe-statement.org).
